# Supplementary material for: Hydrogen evolution, electron-transfer, and hydride-transfer reactions in a nickel–iron hydrogenase model complex: a theoretical study of the distinctive reactivities for the conformational isomers of nickel–iron hydride
Source: Royal Society of Chemistry journal article supplement (doi:10.1039/d1dt03582g), 2021-12-06
Supplement: d1dt03582g1.pdf [file d1dt03582g1.pdf]

## Supporting Information

# Hydrogen evolution, electron-transfer, hydride-transfer reactions in a nickel-iron hydrogenase model complex: A theoretical study of the distinctive reactivities for the conformational isomers of nickel-iron hydride

Miho Isegawa,<sup>\*†</sup> Takahiro Matsumoto, Seiji Ogo

<sup>†</sup>International Institute for Carbon-Neutral Energy Research (WPI- I<sup>2</sup>CNER), Kyushu University 744 Moto-oka, Nishi-ku, Fukuoka 819-0395, Japan

\*E-mail addresses: [isegawa.miho.169@m.kyushu-u.ac.jp](mailto:isegawa.miho.169@m.kyushu-u.ac.jp)

### Contents

|                                                                                                                   |            |
|-------------------------------------------------------------------------------------------------------------------|------------|
| 1. Metal hydride complexes produced by H <sub>2</sub> activation/evolution by hydrogenases                        | Page S2    |
| 2. Structures of intermediates of proton-transfer, hydrogen-atom-transfer, and hydride-transfer reactions         | Page S2    |
| 3. Relative energy (kcal/mol) for the singlet spin state                                                          | Page S3    |
| 4. Experimentally determined product yields                                                                       | Page S3    |
| 5. Reaction energies (kcal/mol) for coordination of H <sub>2</sub> O and CH <sub>3</sub> CN to vacant sites of Fe | Page S4    |
| 6. Kinetic isotope effect for hydride transfer                                                                    | Page S4    |
| 7. Imaginary frequencies (cm <sup>-1</sup> ) of optimized transition states                                       | Page S4    |
| 8. Total electronic energy, thermal corrections to enthalpy and free energy                                       | Page S5-S6 |
| 9. XYZ coordinate                                                                                                 | Page S7-   |

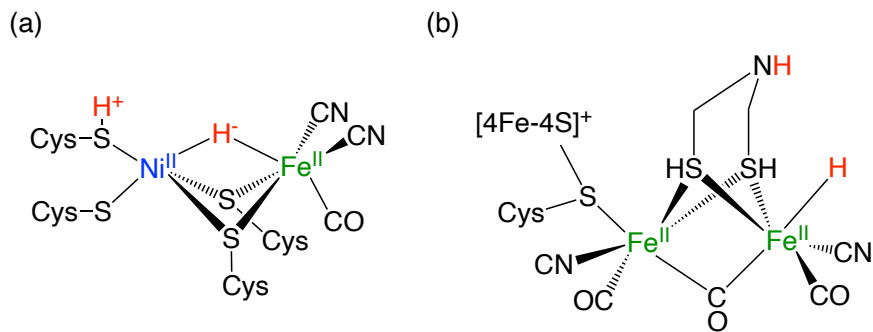

**Fig. S1** Metal hydride complexes produced by H<sub>2</sub> activation/evolution by (a) NiFe hydrogenase and (b) FeFe hydrogenase.

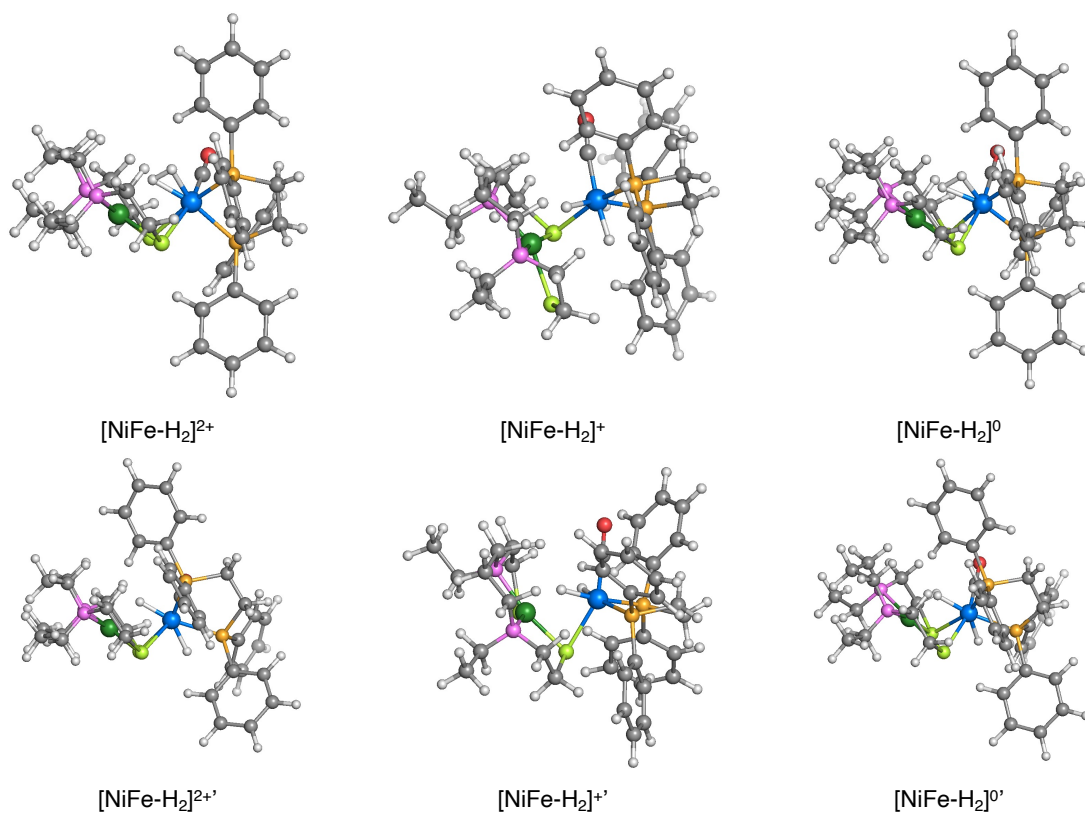

**Fig. S2** Structures of intermediates of proton-transfer, hydrogen-atom-transfer, and hydride-transfer reactions occurring between NiFe hydride complexes.

**Table S1** Relative energy (kcal/mol) for the singlet spin state. The spin multiplicity of the ground state is shown in bold

| [NiFe-H <sub>2</sub> ] <sup>2+</sup> |              |         |         |
|--------------------------------------|--------------|---------|---------|
| <b>S = 0</b>                         | S = 1        | S = 2   | S = 3   |
| <b>0.0</b>                           | 16.2         | 32.7    | 54.1    |
| [NiFe-H <sub>2</sub> ] <sup>+</sup>  |              |         |         |
| <b>S = 1/2</b>                       | S = 3/2      | S = 5/2 | S = 7/2 |
| <b>0.0</b>                           | 16.9         | 24.5    | 67.8    |
| [NiFe-H <sub>2</sub> ] <sup>0</sup>  |              |         |         |
| <b>S = 0</b>                         | S = 1        | S = 2   | S = 3   |
| <b>0.0</b>                           | 1.1          | 37.2    | 67.5    |
| [NiFe] <sup>0</sup>                  |              |         |         |
| S = 0                                | <b>S = 1</b> | S = 2   | S = 3   |
| 0.0                                  | <b>-4.8</b>  | 9.3     | 46.0    |
| [NiFe] <sup>+</sup>                  |              |         |         |
| <b>S = 1/2</b>                       | S = 3/2      | S = 5/2 | S = 7/2 |
| <b>0.0</b>                           | 12.3         | 33.1    | 82.1    |
| [NiFe] <sup>2+</sup>                 |              |         |         |
| <b>S = 0</b>                         | S = 1        | S = 2   | S = 3   |
| <b>0.0</b>                           | 8.6          | 25.7    | 53.1    |

**Table S2** Experimentally determined product yields at specific times for electron transfer, hydride transfer, and H<sub>2</sub> generation reactions in NiFe hydride complexes

|                                       | <b>2a</b> | <b>2b</b> | <b>2c</b> |
|---------------------------------------|-----------|-----------|-----------|
| Electron transfer (1 minute)          | 57%       | 27%       | 33%       |
| Hydride transfer (60 minutes)         | 4%        | 14%       | 31%       |
| H <sub>2</sub> evolution (30 minutes) | 16%       | 55%       | 9%        |

The data is taken from previous study.<sup>11</sup>

<sup>a</sup> [Fe<sup>III</sup>(C<sub>5</sub>Me<sub>5</sub>)<sub>2</sub>]<sup>+</sup> is used as electron acceptor in electron transfer reaction.

<sup>b</sup> MB is used as hydride acceptor in the hydride transfer reaction.

<sup>c</sup> CH<sub>3</sub>COOH is used as proton donor in the H<sub>2</sub> evolution reaction.

**Table S3** Reaction energies (kcal/mol) for coordination of H<sub>2</sub>O and CH<sub>3</sub>CN to vacant sites of Fe produced by hydride removal and H<sub>2</sub> removal, respectively

|            | <b>2a + X → 2a-X</b> | <b>2b + X → 2b-X</b> | <b>2c + X → 2c-X</b> |
|------------|----------------------|----------------------|----------------------|
|            |                      | H <sub>2</sub> O     |                      |
| $\Delta G$ | 14.6                 | 6.4                  | 3.3                  |
|            |                      | CH <sub>3</sub> CN   |                      |
| $\Delta G$ | 4.2                  | -2.7                 | -9.4                 |

**Table S4** Reaction barriers (kcal/mol), rate constant (s<sup>-1</sup>), and kinetic isotope effect for hydride transfer

|           | $\Delta G_H$ | $\Delta G_D$ | $k_H$                | $k_D$                | $k_H/k_D$ |
|-----------|--------------|--------------|----------------------|----------------------|-----------|
| <b>2a</b> | 21.3         | 24.4         | $0.2 \times 10^{-2}$ | $0.8 \times 10^{-5}$ | 187.2     |
| <b>2b</b> | 8.0          | 12.6         | $0.8 \times 10^7$    | $0.4 \times 10^4$    | 2354.1    |
| <b>2c</b> | 17.4         | 22.5         | $0.1 \times 10$      | $0.2 \times 10^{-3}$ | 5474.2    |

**Table S5.** Imaginary frequencies (cm<sup>-1</sup>) of optimized transition states

| label                                     | frequency |
|-------------------------------------------|-----------|
| <b>TS-2a2b<sup>+</sup>(acetone)</b>       | -499.3    |
| <b>TS-2a2c<sup>+</sup>(acetone)</b>       | -47.8     |
| <b>TS-2b2c<sup>+</sup>(acetone)</b>       | -189.7    |
| <b>TS-HD-a<sup>2+</sup>(water)</b>        | -269.0    |
| <b>TS-HD-b<sup>2+</sup>(water)</b>        | -542.3    |
| <b>TS-HD-c<sup>2+</sup>(water)</b>        | -4430.1   |
| <b>TS-HT-a<sup>2+</sup>(acetonitrile)</b> | -359.7    |
| <b>TS-HT-b<sup>2+</sup>(acetonitrile)</b> | -879.0    |
| <b>TS-HT-c<sup>2+</sup>(acetonitrile)</b> | -1051.3   |
| <b>TS-PTa<sup>+</sup>(water)</b>          | -467.6    |
| <b>TS-PTb<sup>+</sup>(water)</b>          | -758.5    |
| <b>TS-PTc<sup>+</sup>(water)</b>          | -595.8    |

**Table S6.** Total electronic energy ( $E_{\text{SCF}}$ ), thermal correction to enthalpy ( $H_{\text{corr}}$ ), and thermal correction to free energy ( $G_{\text{corr}}$ ). All are given in a.u.

| label                                     | $E_{\text{SCF}}$ | $H_{\text{corr}}$ | $G_{\text{corr}}$ |
|-------------------------------------------|------------------|-------------------|-------------------|
| <b>2a<sup>+</sup>(acetone)</b>            | -3437.5101454    | 0.824337          | 0.69449           |
| <b>2a<sup>+</sup>(acetonitrile)</b>       | -3437.5103864    | 0.824343          | 0.694976          |
| <b>2a<sup>+</sup>(water)</b>              | -3437.4781160    | 0.824615          | 0.694348          |
| <b>2ad<sup>+</sup>(acetone)</b>           | -3437.5057554    | 0.82399           | 0.693203          |
| <b>2add<sup>+</sup>(acetone)</b>          | -3437.5028890    | 0.824459          | 0.694048          |
| <b>2b<sup>+</sup>(acetone)</b>            | -3437.5022114    | 0.824166          | 0.695035          |
| <b>2b<sup>+</sup>(acetonitrile)</b>       | -3437.5025265    | 0.823982          | 0.694805          |
| <b>2b<sup>+</sup>(water)</b>              | -3437.4713328    | 0.824417          | 0.695475          |
| <b>2bd<sup>+</sup>(acetone)</b>           | -3437.5048390    | 0.824063          | 0.694861          |
| <b>2bdd<sup>+</sup>(acetone)</b>          | -3437.5018544    | 0.824112          | 0.693168          |
| <b>2c<sup>+</sup>(acetone)</b>            | -3437.5043176    | 0.824092          | 0.692302          |
| <b>2c<sup>+</sup>(acetonitrile)</b>       | -3437.5046509    | 0.824286          | 0.69382           |
| <b>2c<sup>+</sup>(water)</b>              | -3437.4729372    | 0.824706          | 0.695091          |
| <b>2cd<sup>+</sup>(acetone)</b>           | -3437.4968298    | 0.823683          | 0.693329          |
| <b>2cdd<sup>+</sup>(acetone)</b>          | -3437.5043053    | 0.824106          | 0.691933          |
| <b>3a<sup>2+</sup>(acetonitrile)</b>      | -3436.7712756    | 0.818508          | 0.692569          |
| <b>3a<sup>2+</sup>(water)</b>             | -3436.7442795    | 0.819588          | 0.692639          |
| <b>3ad<sup>2+</sup>(acetonitrile)</b>     | -4620.7370170    | 1.155859          | 0.982146          |
| <b>3b<sup>2+</sup>(acetonitrile)</b>      | -3569.6102010    | 0.868201          | 0.730326          |
| <b>3b<sup>2+</sup>(water)</b>             | -3436.7458124    | 0.819143          | 0.694351          |
| <b>3c<sup>2+</sup>(acetonitrile)</b>      | -3569.6018212    | 0.86847           | 0.731939          |
| <b>3c<sup>2+</sup>(water)</b>             | -3436.7195734    | 0.818223          | 0.688685          |
| <b>4a<sup>2+</sup>(water)</b>             | -3437.9168244    | 0.835226          | 0.705287          |
| <b>4b<sup>2+</sup>(water)</b>             | -3437.9180518    | 0.836137          | 0.706893          |
| <b>4c<sup>2+</sup>(water)</b>             | -3437.9163798    | 0.836088          | 0.707501          |
| <b>TS-2a2b<sup>+</sup>(acetone)</b>       | -3437.4571059    | 0.822135          | 0.691822          |
| <b>TS-2a2c<sup>+</sup>(acetone)</b>       | -3437.4682316    | 0.822519          | 0.693758          |
| <b>TS-2b2c<sup>+</sup>(acetone)</b>       | -3437.4653189    | 0.82181           | 0.691647          |
| <b>TS-HD-a<sup>2+</sup>(water)</b>        | -3437.9120168    | 0.832181          | 0.702649          |
| <b>TS-HD-b<sup>2+</sup>(water)</b>        | -3437.9146285    | 0.83201           | 0.702278          |
| <b>TS-HD-c<sup>2+</sup>(water)</b>        | -3437.8999451    | 0.831588          | 0.700124          |
| <b>TS-HT-a<sup>2+</sup>(acetonitrile)</b> | -4620.7242812    | 1.148991          | 0.978147          |
| <b>TS-HT-b<sup>2+</sup>(acetonitrile)</b> | -4620.7367498    | 1.147041          | 0.977048          |
| <b>TS-HT-c<sup>2+</sup>(acetonitrile)</b> | -4620.7208038    | 1.146888          | 0.972981          |

**Table S7 (Continue).** Total electronic energy ( $E_{\text{SCF}}$ ), thermal correction to enthalpy ( $H_{\text{corr}}$ ), and thermal correction to free energy ( $G_{\text{corr}}$ ). All are given in a.u.

| label                                           | $E_{\text{SCF}}$ | $H_{\text{corr}}$ | $G_{\text{corr}}$ |
|-------------------------------------------------|------------------|-------------------|-------------------|
| <b>TS-PT-a<sup>+</sup>(water)</b>               | -3743.1612580    | 0.912745          | 0.76415           |
| <b>TS-PT-b<sup>+</sup>(water)</b>               | -3743.1609015    | 0.913241          | 0.76599           |
| <b>TS-PT-c<sup>+</sup>(water)</b>               | -3743.1641398    | 0.913525          | 0.766868          |
| <b>CH<sub>3</sub>COOH-H<sub>2</sub>O(water)</b> | -305.6838927     | 0.091747          | 0.051747          |
| <b>CH<sub>3</sub>COO-H<sub>2</sub>O(water)</b>  | -305.2266496     | 0.078754          | 0.039644          |
| <b>H<sub>2</sub>(water)</b>                     | -1.1748220       | 0.013032          | -0.001822         |
| <b>H<sub>2</sub>O(water)</b>                    | -76.4755123      | 0.024229          | 0.002747          |
| <b>MBH(acetonitrile)</b>                        | -1183.9750398    | 0.333988          | 0.264365          |
| <b>MB(acetonitrile)</b>                         | -1183.2224384    | 0.324199          | 0.257719          |
| <b>MeCN(acetonitrile)</b>                       | -132.8155918     | 0.048157          | 0.019518          |

**XYZ coordinate**2a<sup>+</sup> (acetone)

|    |           |           |           |
|----|-----------|-----------|-----------|
| Ni | 1.624992  | -1.290651 | -0.854392 |
| Fe | -0.395313 | -0.152485 | 0.373523  |
| S  | 0.230338  | 0.073748  | -1.959142 |
| S  | -0.304708 | -2.341246 | -0.504100 |
| P  | -0.334146 | 1.922028  | 1.039856  |
| P  | -2.637180 | 0.080301  | 0.197710  |
| O  | -0.442528 | -0.980914 | 3.148803  |
| N  | 3.189464  | -0.155889 | -1.405088 |
| N  | 2.579702  | -2.721776 | 0.193841  |
| C  | -0.453855 | -0.638797 | 2.020477  |
| C  | -1.986689 | 2.262337  | 1.868052  |
| H  | -1.920228 | 1.748407  | 2.850750  |
| H  | -2.116957 | 3.347833  | 2.053914  |
| C  | -3.135621 | 1.700896  | 1.018532  |
| H  | -3.381507 | 2.406939  | 0.200658  |
| H  | -4.060473 | 1.567734  | 1.615432  |
| C  | -0.175017 | 3.264812  | -0.221263 |
| C  | -1.103344 | 3.316743  | -1.289548 |
| H  | -1.910271 | 2.573593  | -1.371073 |
| C  | -0.977538 | 4.288427  | -2.295589 |
| H  | -1.708890 | 4.314663  | -3.119081 |
| C  | 0.089974  | 5.206119  | -2.265280 |
| H  | 0.194984  | 5.959568  | -3.062191 |
| C  | 1.027639  | 5.147478  | -1.219366 |
| H  | 1.872773  | 5.854004  | -1.193025 |
| C  | 0.896032  | 4.185614  | -0.200445 |
| H  | 1.642086  | 4.150518  | 0.608014  |
| C  | 0.904723  | 2.379352  | 2.330086  |
| C  | 0.727651  | 3.515287  | 3.153661  |
| H  | -0.160675 | 4.155837  | 3.037910  |
| C  | 1.693968  | 3.843931  | 4.120190  |
| H  | 1.546469  | 4.729114  | 4.759558  |
| C  | 2.846351  | 3.048972  | 4.269989  |
| H  | 3.602052  | 3.311089  | 5.027827  |
| C  | 3.028628  | 1.919208  | 3.452041  |
| H  | 3.926684  | 1.290496  | 3.564052  |
| C  | 2.060088  | 1.584341  | 2.489950  |
| H  | 2.182996  | 0.692683  | 1.853546  |
| C  | -3.553866 | 0.068216  | -1.407874 |
| C  | -3.079155 | -0.769611 | -2.443476 |
| H  | -2.182005 | -1.385279 | -2.280908 |
| C  | -3.746924 | -0.825421 | -3.679556 |
| H  | -3.365733 | -1.485551 | -4.475240 |
| C  | -4.890207 | -0.036771 | -3.900172 |
| H  | -5.409963 | -0.074156 | -4.871029 |
| C  | -5.370356 | 0.798787  | -2.874290 |
| H  | -6.270253 | 1.413485  | -3.037882 |
| C  | -4.711440 | 0.849066  | -1.633201 |
| H  | -5.115818 | 1.496904  | -0.839934 |
| C  | -3.489538 | -1.243382 | 1.163114  |
| C  | -3.779954 | -2.486413 | 0.554256  |
| H  | -3.615722 | -2.626739 | -0.525495 |
| C  | -4.284462 | -3.551551 | 1.320247  |
| H  | -4.510221 | -4.513184 | 0.831493  |
| C  | -4.504697 | -3.391206 | 2.701304  |
| H  | -4.901555 | -4.226693 | 3.300024  |
| C  | -4.216217 | -2.157340 | 3.312499  |
| H  | -4.385532 | -2.021887 | 4.393048  |
| C  | -3.706929 | -1.090031 | 2.551372  |
| H  | -3.469048 | -0.139004 | 3.053289  |

|   |           |           |           |
|---|-----------|-----------|-----------|
| C | 1.476228  | 1.368415  | -2.385687 |
| H | 1.737395  | 1.211211  | -3.451879 |
| H | 1.017104  | 2.370172  | -2.303645 |
| C | 2.670169  | 1.252836  | -1.471764 |
| H | 3.483553  | 1.947568  | -1.779035 |
| H | 2.367071  | 1.523832  | -0.440359 |
| C | 3.607137  | -0.685267 | -2.754268 |
| H | 2.689476  | -0.773825 | -3.366560 |
| H | 3.957341  | -1.721137 | -2.589561 |
| C | 4.671997  | 0.117739  | -3.504530 |
| H | 4.873278  | -0.389232 | -4.470749 |
| H | 4.338395  | 1.149848  | -3.735507 |
| H | 5.633503  | 0.174551  | -2.955129 |
| C | 4.323305  | -0.145934 | -0.433593 |
| H | 3.961462  | 0.404119  | 0.457886  |
| H | 5.156936  | 0.450425  | -0.863227 |
| C | 4.821023  | -1.517535 | 0.002848  |
| H | 5.734312  | -1.355333 | 0.612278  |
| H | 5.143744  | -2.137606 | -0.858831 |
| C | 3.816202  | -2.245403 | 0.884670  |
| H | 4.298203  | -3.109032 | 1.391423  |
| H | 3.475414  | -1.553439 | 1.681810  |
| C | 2.861123  | -3.830123 | -0.788408 |
| H | 3.526419  | -3.404849 | -1.563391 |
| H | 1.906435  | -4.053294 | -1.302133 |
| C | 3.469436  | -5.113365 | -0.218851 |
| H | 3.605729  | -5.832331 | -1.052928 |
| H | 4.464809  | -4.950300 | 0.241610  |
| H | 2.810636  | -5.598335 | 0.529882  |
| C | 1.633113  | -3.143786 | 1.283536  |
| H | 1.516325  | -2.260125 | 1.937420  |
| H | 2.091412  | -3.953279 | 1.894322  |
| C | 0.279329  | -3.562358 | 0.753745  |
| H | -0.462948 | -3.611796 | 1.575783  |
| H | 0.302064  | -4.552395 | 0.254124  |
| H | 1.153095  | -0.282668 | 0.550358  |

2a<sup>+</sup> (acetonitrile)

|    |           |           |           |
|----|-----------|-----------|-----------|
| Ni | 1.620945  | -1.289057 | -0.864006 |
| Fe | -0.396899 | -0.153998 | 0.369439  |
| S  | 0.226708  | 0.079823  | -1.964251 |
| S  | -0.310374 | -2.339255 | -0.517020 |
| P  | -0.324129 | 1.917473  | 1.043749  |
| P  | -2.638003 | 0.088143  | 0.201251  |
| O  | -0.449204 | -0.991386 | 3.141850  |
| N  | 3.185640  | -0.153772 | -1.408545 |
| N  | 2.574197  | -2.724610 | 0.179276  |
| C  | -0.456982 | -0.645213 | 2.014310  |
| C  | -1.973117 | 2.260940  | 1.877450  |
| H  | -1.905225 | 1.742483  | 2.857558  |
| H  | -2.098664 | 3.345894  | 2.069097  |
| C  | -3.128154 | 1.706274  | 1.031534  |
| H  | -3.377335 | 2.416038  | 0.217942  |
| H  | -4.049799 | 1.572252  | 1.632989  |
| C  | -0.160890 | 3.266910  | -0.209715 |
| C  | -1.098305 | 3.335760  | -1.269038 |
| H  | -1.914732 | 2.602785  | -1.347034 |
| C  | -0.971035 | 4.312233  | -2.270341 |
| H  | -1.710161 | 4.351933  | -3.086319 |
| C  | 0.106599  | 5.218202  | -2.244175 |
| H  | 0.212202  | 5.975726  | -3.037081 |
| C  | 1.052973  | 5.142882  | -1.207107 |
| H  | 1.905642  | 5.840365  | -1.183986 |

|   |           |           |           |                         |           |           |           |
|---|-----------|-----------|-----------|-------------------------|-----------|-----------|-----------|
| C | 0.920208  | 4.176045  | -0.192989 | H                       | 4.427155  | -4.978684 | 0.236441  |
| H | 1.673667  | 4.127366  | 0.607869  | H                       | 2.760383  | -5.607975 | 0.493960  |
| C | 0.917739  | 2.360365  | 2.336078  | C                       | 1.626888  | -3.148940 | 1.267258  |
| C | 0.758020  | 3.508721  | 3.146134  | H                       | 1.509897  | -2.266915 | 1.923254  |
| H | -0.115981 | 4.165995  | 3.015811  | H                       | 2.084933  | -3.959857 | 1.876097  |
| C | 1.723528  | 3.827957  | 4.116557  | C                       | 0.273296  | -3.566049 | 0.735771  |
| H | 1.589894  | 4.723475  | 4.744470  | H                       | -0.468607 | -3.619066 | 1.557850  |
| C | 2.857723  | 3.010423  | 4.284124  | H                       | 0.297092  | -4.554012 | 0.232368  |
| H | 3.613313  | 3.265259  | 5.044566  | H                       | 1.151053  | -0.288303 | 0.543709  |
| C | 3.022042  | 1.867634  | 3.480433  | 2a <sup>+</sup> (water) |           |           |           |
| H | 3.905635  | 1.221404  | 3.606463  | Ni                      | 1.598365  | -1.260633 | -0.913111 |
| C | 2.054394  | 1.542292  | 2.513829  | Fe                      | -0.405536 | -0.164061 | 0.348129  |
| H | 2.164266  | 0.640370  | 1.889197  | S                       | 0.196866  | 0.148448  | -1.979476 |
| C | -3.560778 | 0.085176  | -1.400758 | S                       | -0.336596 | -2.327336 | -0.597157 |
| C | -3.091354 | -0.749773 | -2.441114 | P                       | -0.316589 | 1.882731  | 1.090693  |
| H | -2.194477 | -1.367189 | -2.283513 | P                       | -2.645202 | 0.091468  | 0.221644  |
| C | -3.764054 | -0.800321 | -3.674836 | O                       | -0.460269 | -1.073133 | 3.095046  |
| H | -3.387244 | -1.458284 | -4.474387 | N                       | 3.169891  | -0.107826 | -1.426513 |
| C | -4.907202 | -0.009238 | -3.887990 | N                       | 2.548810  | -2.714637 | 0.110844  |
| H | -5.430889 | -0.042629 | -4.856841 | C                       | -0.461435 | -0.700793 | 1.972014  |
| C | -5.381940 | 0.823678  | -2.857263 | C                       | -1.950389 | 2.201651  | 1.960110  |
| H | -6.281627 | 1.440103  | -3.015312 | H                       | -1.867559 | 1.647606  | 2.919375  |
| C | -4.717972 | 0.868760  | -1.618565 | H                       | -2.067668 | 3.279651  | 2.190770  |
| H | -5.117646 | 1.514610  | -0.821317 | C                       | -3.119683 | 1.679919  | 1.112840  |
| C | -3.491335 | -1.238310 | 1.162696  | H                       | -3.379139 | 2.418118  | 0.328216  |
| C | -3.788295 | -2.477153 | 0.548230  | H                       | -4.032682 | 1.526026  | 1.722391  |
| H | -3.630160 | -2.611628 | -0.533197 | C                       | -0.160044 | 3.264170  | -0.125737 |
| C | -4.290107 | -3.546073 | 1.310873  | C                       | -1.106770 | 3.365697  | -1.174041 |
| H | -4.520229 | -4.504313 | 0.817590  | H                       | -1.929763 | 2.641231  | -1.263067 |
| C | -4.501368 | -3.393790 | 2.694318  | C                       | -0.979339 | 4.364756  | -2.152523 |
| H | -4.895683 | -4.232246 | 3.290508  | H                       | -1.724565 | 4.430770  | -2.960745 |
| C | -4.207014 | -2.163945 | 3.311112  | C                       | 0.106931  | 5.259814  | -2.114911 |
| H | -4.369405 | -2.034802 | 4.393486  | H                       | 0.212860  | 6.034067  | -2.890990 |
| C | -3.700412 | -1.092908 | 2.553271  | C                       | 1.062701  | 5.150923  | -1.089750 |
| H | -3.457600 | -0.145305 | 3.059237  | H                       | 1.923073  | 5.838009  | -1.059577 |
| C | 1.474321  | 1.373489  | -2.388802 | C                       | 0.930247  | 4.161825  | -0.097694 |
| H | 1.735802  | 1.217206  | -3.455006 | H                       | 1.692316  | 4.084217  | 0.692456  |
| H | 1.015898  | 2.375586  | -2.306387 | C                       | 0.946554  | 2.272332  | 2.376986  |
| C | 2.667680  | 1.255536  | -1.474128 | C                       | 0.815410  | 3.405236  | 3.213059  |
| H | 3.482052  | 1.949689  | -1.779799 | H                       | -0.048230 | 4.079913  | 3.105076  |
| H | 2.365074  | 1.525565  | -0.442430 | C                       | 1.797307  | 3.685434  | 4.178839  |
| C | 3.607632  | -0.680360 | -2.757528 | H                       | 1.687504  | 4.568516  | 4.828026  |
| H | 2.693267  | -0.759389 | -3.375955 | C                       | 2.918611  | 2.844584  | 4.314837  |
| H | 3.949701  | -1.719339 | -2.595563 | H                       | 3.686982  | 3.069289  | 5.071476  |
| C | 4.682555  | 0.118922  | -3.496939 | C                       | 3.054291  | 1.717609  | 3.484251  |
| H | 4.888508  | -0.384904 | -4.463726 | H                       | 3.927671  | 1.053754  | 3.584003  |
| H | 4.357164  | 1.154065  | -3.725900 | C                       | 2.070317  | 1.430780  | 2.522500  |
| H | 5.639835  | 0.167667  | -2.939481 | H                       | 2.159376  | 0.543462  | 1.874400  |
| C | 4.316247  | -0.145952 | -0.432816 | C                       | -3.591236 | 0.134229  | -1.363771 |
| H | 3.949933  | 0.398641  | 0.460285  | C                       | -3.139283 | -0.671581 | -2.434333 |
| H | 5.149336  | 0.454787  | -0.857148 | H                       | -2.241985 | -1.295749 | -2.308312 |
| C | 4.816232  | -1.518939 | -0.003524 | C                       | -3.829396 | -0.682884 | -3.659102 |
| H | 5.728088  | -1.358264 | 0.608470  | H                       | -3.466871 | -1.318143 | -4.482773 |
| H | 5.141584  | -2.133210 | -0.868366 | C                       | -4.971233 | 0.119454  | -3.833067 |
| C | 3.811935  | -2.254157 | 0.872785  | H                       | -5.508013 | 0.117197  | -4.794928 |
| H | 4.293690  | -3.122446 | 1.371874  | C                       | -5.427387 | 0.924253  | -2.772373 |
| H | 3.472130  | -1.568481 | 1.675716  | H                       | -6.324983 | 1.550098  | -2.899922 |
| C | 2.852783  | -3.829870 | -0.807512 | C                       | -4.746525 | 0.930015  | -1.542287 |
| H | 3.532573  | -3.408156 | -1.571657 | H                       | -5.131287 | 1.554515  | -0.721411 |
| H | 1.901219  | -4.037522 | -1.333589 | C                       | -3.461519 | -1.272664 | 1.159567  |
| C | 3.436844  | -5.125202 | -0.240274 | C                       | -3.711967 | -2.509881 | 0.521350  |
| H | 3.576868  | -5.838397 | -1.078724 | H                       | -3.553611 | -2.616659 | -0.562946 |



|                            |           |           |           |   |           |           |           |
|----------------------------|-----------|-----------|-----------|---|-----------|-----------|-----------|
| C                          | -4.164164 | -3.613090 | 1.265242  | C | -2.090735 | 2.577081  | -1.357160 |
| H                          | -4.357990 | -4.570036 | 0.754886  | H | -1.943778 | 1.530511  | -1.666065 |
| C                          | -4.371147 | -3.497200 | 2.652840  | C | -2.774578 | 3.462514  | -2.208541 |
| H                          | -4.725342 | -4.363078 | 3.234222  | H | -3.163011 | 3.097008  | -3.172432 |
| C                          | -4.123259 | -2.269220 | 3.292661  | C | -2.958918 | 4.803789  | -1.829330 |
| H                          | -4.282516 | -2.168801 | 4.378170  | H | -3.490507 | 5.500243  | -2.497487 |
| C                          | -3.666623 | -1.163033 | 2.553883  | C | -2.465285 | 5.253331  | -0.589877 |
| H                          | -3.456028 | -0.217775 | 3.078219  | H | -2.612489 | 6.301304  | -0.282827 |
| C                          | 1.456308  | 1.441853  | -2.369342 | C | -1.787914 | 4.368182  | 0.266245  |
| H                          | 1.721628  | 1.301876  | -3.436843 | H | -1.421725 | 4.730887  | 1.239757  |
| H                          | 1.006699  | 2.446524  | -2.271247 | C | 0.343907  | 2.759623  | 2.081417  |
| C                          | 2.648926  | 1.300201  | -1.456469 | C | 1.183612  | 3.723277  | 1.474509  |
| H                          | 3.460987  | 2.004602  | -1.744624 | H | 1.037842  | 3.997281  | 0.417693  |
| H                          | 2.348558  | 1.544458  | -0.417953 | C | 2.203660  | 4.344154  | 2.215150  |
| C                          | 3.586790  | -0.603046 | -2.787958 | H | 2.848843  | 5.093986  | 1.729861  |
| H                          | 2.667045  | -0.698355 | -3.396781 | C | 2.398081  | 4.012428  | 3.568790  |
| H                          | 3.959971  | -1.634428 | -2.645801 | H | 3.198187  | 4.499669  | 4.148633  |
| C                          | 4.628866  | 0.236072  | -3.529717 | C | 1.562408  | 3.059422  | 4.180003  |
| H                          | 4.849943  | -0.259214 | -4.497216 | H | 1.703644  | 2.799256  | 5.241365  |
| H                          | 4.263145  | 1.258213  | -3.755230 | C | 0.541934  | 2.433442  | 3.442718  |
| H                          | 5.584369  | 0.319451  | -2.973738 | H | -0.093418 | 1.682798  | 3.936820  |
| C                          | 4.304725  | -0.123584 | -0.456098 | C | -3.431711 | -0.794933 | -1.242018 |
| H                          | 3.951800  | 0.418199  | 0.444109  | C | -2.774500 | -1.283658 | -2.393907 |
| H                          | 5.144676  | 0.469496  | -0.877922 | H | -1.713260 | -1.567807 | -2.338410 |
| C                          | 4.789178  | -1.506183 | -0.039676 | C | -3.467700 | -1.408111 | -3.611107 |
| H                          | 5.698676  | -1.359394 | 0.578639  | H | -2.942437 | -1.790956 | -4.500873 |
| H                          | 5.113084  | -2.113986 | -0.909419 | C | -4.822046 | -1.038268 | -3.692279 |
| C                          | 3.774259  | -2.242686 | 0.822793  | H | -5.363902 | -1.127713 | -4.647528 |
| H                          | 4.250541  | -3.110242 | 1.328387  | C | -5.484821 | -0.556104 | -2.547612 |
| H                          | 3.421352  | -1.558893 | 1.621861  | H | -6.548169 | -0.272216 | -2.603269 |
| C                          | 2.844221  | -3.792323 | -0.898662 | C | -4.797515 | -0.438773 | -1.327122 |
| H                          | 3.474838  | -3.331305 | -1.682461 | H | -5.337868 | -0.072181 | -0.440408 |
| H                          | 1.885156  | -4.039088 | -1.393244 | C | -2.813572 | -2.225574 | 1.192513  |
| C                          | 3.510183  | -5.062356 | -0.367284 | C | -2.783990 | -3.445059 | 0.477233  |
| H                          | 3.626429  | -5.772929 | -1.210987 | H | -2.683767 | -3.441866 | -0.619245 |
| H                          | 4.520558  | -4.872337 | 0.047393  | C | -2.886103 | -4.669838 | 1.159781  |
| H                          | 2.899339  | -5.566307 | 0.408943  | H | -2.864654 | -5.612973 | 0.590142  |
| C                          | 1.597501  | -3.171183 | 1.181045  | C | -3.019396 | -4.692745 | 2.560764  |
| H                          | 1.482227  | -2.310813 | 1.865202  | H | -3.100216 | -5.653555 | 3.093966  |
| H                          | 2.051751  | -4.001253 | 1.766302  | C | -3.052443 | -3.481853 | 3.276842  |
| C                          | 0.242280  | -3.572450 | 0.638455  | H | -3.159633 | -3.490178 | 4.373631  |
| H                          | -0.501353 | -3.630893 | 1.458910  | C | -2.945951 | -2.254207 | 2.599445  |
| H                          | 0.262336  | -4.553456 | 0.121782  | H | -2.955590 | -1.317075 | 3.177829  |
| H                          | 1.142969  | -0.301176 | 0.510214  | C | 1.211067  | 1.879114  | -2.114717 |
| 2ad <sup>+</sup> (acetone) |           |           |           | H | 1.432787  | 1.967171  | -3.197926 |
| Ni                         | 2.001154  | -0.818315 | -0.865424 | H | 0.530993  | 2.710199  | -1.841837 |
| Fe                         | -0.239138 | -0.201405 | 0.405201  | C | 2.454189  | 1.917517  | -1.257808 |
| S                          | 0.334433  | 0.268184  | -1.881715 | H | 2.156880  | 1.994725  | -0.194591 |
| S                          | 0.352667  | -2.272295 | -0.553356 | H | 3.082319  | 2.803795  | -1.500579 |
| P                          | -0.854441 | 1.796932  | 1.071027  | C | 3.718168  | 0.354489  | -2.763259 |
| P                          | -2.461727 | -0.637632 | 0.322751  | H | 4.266796  | -0.605647 | -2.714195 |
| O                          | 0.119983  | -1.069968 | 3.145911  | H | 2.808859  | 0.149329  | -3.359648 |
| N                          | 3.266311  | 0.658838  | -1.357882 | C | 4.573695  | 1.420079  | -3.451777 |
| N                          | 3.262507  | -2.077129 | 0.059418  | H | 4.814509  | 1.065030  | -4.475061 |
| C                          | -0.071052 | -0.710442 | 2.039203  | H | 4.040568  | 2.387212  | -3.554749 |
| C                          | -2.361978 | 1.503633  | 2.149433  | H | 5.535404  | 1.602578  | -2.930891 |
| H                          | -2.032917 | 0.936936  | 3.044654  | C | 4.419146  | 0.829352  | -0.423806 |
| H                          | -2.790746 | 2.470819  | 2.483307  | H | 5.088885  | 1.620768  | -0.823658 |
| C                          | -3.361926 | 0.691533  | 1.310847  | H | 3.994300  | 1.215873  | 0.524849  |
| H                          | -3.850998 | 1.351909  | 0.565280  | C | 5.207486  | -0.439204 | -0.127073 |
| H                          | -4.162540 | 0.244226  | 1.933481  | H | 6.104805  | -0.140332 | 0.453706  |
| C                          | -1.582955 | 3.021993  | -0.117223 | H | 5.594255  | -0.916667 | -1.051128 |

|                             |           |           |           |                           |           |           |           |
|-----------------------------|-----------|-----------|-----------|---------------------------|-----------|-----------|-----------|
| C                           | 4.417613  | -1.413446 | 0.735834  | H                         | 1.372281  | 6.058731  | -3.630429 |
| H                           | 3.993954  | -0.859462 | 1.597761  | C                         | 2.204570  | 5.270563  | -1.777257 |
| H                           | 5.086023  | -2.197325 | 1.152222  | H                         | 2.975813  | 6.053477  | -1.696416 |
| C                           | 3.709108  | -3.040978 | -1.011378 | C                         | 2.122000  | 4.272584  | -0.790000 |
| H                           | 4.194821  | -2.433153 | -1.798992 | H                         | 2.823283  | 4.298348  | 0.058369  |
| H                           | 2.793087  | -3.453175 | -1.475735 | C                         | -0.053408 | 2.874804  | 1.659594  |
| C                           | 4.634916  | -4.175901 | -0.569278 | C                         | -1.149375 | 3.656497  | 1.227427  |
| H                           | 4.831889  | -4.824787 | -1.447517 | H                         | -1.378736 | 3.741727  | 0.153492  |
| H                           | 5.615713  | -3.812771 | -0.201203 | C                         | -1.957166 | 4.332470  | 2.157195  |
| H                           | 4.178301  | -4.812411 | 0.216041  | H                         | -2.807685 | 4.935703  | 1.801319  |
| C                           | 2.467405  | -2.741066 | 1.150886  | C                         | -1.680042 | 4.242483  | 3.533823  |
| H                           | 2.209399  | -1.935344 | 1.862642  | H                         | -2.312775 | 4.773700  | 4.262674  |
| H                           | 3.103854  | -3.475768 | 1.692990  | C                         | -0.585888 | 3.476403  | 3.972835  |
| C                           | 1.199390  | -3.394458 | 0.644049  | H                         | -0.356590 | 3.402209  | 5.047914  |
| H                           | 0.507209  | -3.606764 | 1.483734  | C                         | 0.221530  | 2.794368  | 3.044254  |
| H                           | 1.390516  | -4.347803 | 0.110506  | H                         | 1.064086  | 2.194125  | 3.419221  |
| H                           | 1.295394  | 0.065823  | 0.596095  | C                         | -1.926579 | 0.144030  | 2.530990  |
| 2add <sup>+</sup> (acetone) |           |           |           | H                         | -2.436241 | -0.493516 | 3.282562  |
| Ni                          | -2.039930 | -1.068701 | -0.289033 | H                         | -1.326095 | 0.895699  | 3.077851  |
| Fe                          | 0.426476  | -0.075991 | -0.306735 | C                         | -2.891432 | 0.830729  | 1.596064  |
| S                           | -0.806422 | -0.972038 | 1.578171  | H                         | -2.334802 | 1.548788  | 0.968781  |
| S                           | -0.284381 | -2.247361 | -0.938175 | H                         | -3.660021 | 1.405192  | 2.160417  |
| P                           | 2.362898  | -0.801532 | 0.644662  | C                         | -4.335796 | -1.196307 | 1.334148  |
| P                           | 0.967429  | 1.950800  | 0.410234  | H                         | -4.767318 | -1.836025 | 0.541697  |
| O                           | 1.263626  | 0.363933  | -3.042117 | H                         | -3.607376 | -1.834245 | 1.870881  |
| N                           | -3.546674 | -0.117616 | 0.637397  | C                         | -5.435233 | -0.727487 | 2.289648  |
| N                           | -2.893019 | -1.377511 | -2.084158 | H                         | -5.933028 | -1.623802 | 2.713858  |
| C                           | 0.960107  | 0.226044  | -1.911094 | H                         | -5.033658 | -0.139177 | 3.139649  |
| C                           | 2.822893  | 0.497260  | 1.907019  | H                         | -6.216100 | -0.124711 | 1.783085  |
| H                           | 2.118148  | 0.378518  | 2.756384  | C                         | -4.401436 | 0.723197  | -0.254688 |
| H                           | 3.855349  | 0.336164  | 2.279897  | H                         | -5.237094 | 1.144963  | 0.344509  |
| C                           | 2.652125  | 1.868464  | 1.243052  | H                         | -3.767673 | 1.577367  | -0.569765 |
| H                           | 3.405193  | 2.008916  | 0.439922  | C                         | -4.937101 | 0.027847  | -1.498641 |
| H                           | 2.778593  | 2.700912  | 1.963779  | H                         | -5.631949 | 0.737359  | -1.994401 |
| C                           | 3.916563  | -0.881274 | -0.365968 | H                         | -5.550137 | -0.862598 | -1.248697 |
| C                           | 4.121397  | 0.086357  | -1.376949 | C                         | -3.836329 | -0.296300 | -2.499300 |
| H                           | 3.343701  | 0.833126  | -1.592244 | H                         | -3.215250 | 0.609666  | -2.655302 |
| C                           | 5.318655  | 0.111076  | -2.113811 | H                         | -4.274077 | -0.562737 | -3.485553 |
| H                           | 5.459430  | 0.874229  | -2.896062 | C                         | -3.566334 | -2.724165 | -1.998986 |
| C                           | 6.325681  | -0.836480 | -1.857797 | H                         | -4.320583 | -2.652998 | -1.193455 |
| H                           | 7.260174  | -0.823874 | -2.441444 | H                         | -2.807572 | -3.440282 | -1.630557 |
| C                           | 6.133845  | -1.799348 | -0.849800 | C                         | -4.213197 | -3.248078 | -3.282363 |
| H                           | 6.920287  | -2.541370 | -0.636794 | H                         | -4.635007 | -4.252769 | -3.072995 |
| C                           | 4.942505  | -1.818969 | -0.103519 | H                         | -5.046511 | -2.607507 | -3.635608 |
| H                           | 4.817196  | -2.570591 | 0.690948  | H                         | -3.482687 | -3.362326 | -4.108978 |
| C                           | 2.329898  | -2.403141 | 1.541999  | C                         | -1.768941 | -1.360604 | -3.082570 |
| C                           | 2.312730  | -3.596981 | 0.779943  | H                         | -1.354131 | -0.335305 | -3.052366 |
| H                           | 2.429295  | -3.552047 | -0.314184 | H                         | -2.165511 | -1.535097 | -4.107673 |
| C                           | 2.159431  | -4.842432 | 1.410063  | C                         | -0.680934 | -2.354412 | -2.741892 |
| H                           | 2.155364  | -5.762933 | 0.804383  | H                         | 0.233689  | -2.144562 | -3.331112 |
| C                           | 2.008588  | -4.914165 | 2.808179  | H                         | -0.978766 | -3.404061 | -2.940380 |
| H                           | 1.884403  | -5.891257 | 3.302118  | H                         | -0.989298 | 0.428280  | -0.758443 |
| C                           | 2.018306  | -3.732902 | 3.570991  | 2b <sup>+</sup> (acetone) |           |           |           |
| H                           | 1.903170  | -3.780287 | 4.665907  | Ni                        | 2.009857  | -1.018259 | -0.969549 |
| C                           | 2.176709  | -2.483340 | 2.943923  | Fe                        | -0.498766 | 0.108410  | -0.228005 |
| H                           | 2.179393  | -1.573254 | 3.562026  | S                         | 1.111097  | 0.793008  | -1.854357 |
| C                           | 1.145233  | 3.256116  | -0.887827 | S                         | 0.014065  | -1.856533 | -1.390017 |
| C                           | 0.243371  | 3.267401  | -1.975612 | P                         | -0.993909 | 2.110006  | 0.544797  |
| H                           | -0.522059 | 2.478964  | -2.053615 | P                         | -2.444312 | -0.586980 | 0.456268  |
| C                           | 0.320380  | 4.274154  | -2.953456 | O                         | 0.864206  | -0.737381 | 2.237286  |
| H                           | -0.389484 | 4.272492  | -3.796207 | N                         | 3.546400  | 0.081513  | -0.265725 |
| C                           | 1.305313  | 5.274180  | -2.859622 | N                         | 2.722012  | -2.870243 | -0.528078 |

|   |           |           |           |                                |           |           |           |
|---|-----------|-----------|-----------|--------------------------------|-----------|-----------|-----------|
| C | 0.411317  | -0.370084 | 1.208221  | H                              | 5.576444  | 2.058573  | -0.984464 |
| C | -2.423992 | 1.908839  | 1.740148  | H                              | 6.377887  | 0.700118  | -0.118516 |
| H | -1.980680 | 1.567760  | 2.698040  | C                              | 4.016756  | -0.426489 | 1.061498  |
| H | -2.915337 | 2.885467  | 1.926074  | H                              | 4.852757  | 0.215749  | 1.415197  |
| C | -3.392927 | 0.871012  | 1.172961  | H                              | 3.174908  | -0.271404 | 1.762867  |
| H | -3.961654 | 1.292221  | 0.316648  | C                              | 4.436078  | -1.889803 | 1.106522  |
| H | -4.122923 | 0.512161  | 1.926847  | H                              | 4.799447  | -2.083118 | 2.137810  |
| C | -1.608912 | 3.390149  | -0.642264 | H                              | 5.310968  | -2.081434 | 0.451678  |
| C | -2.109830 | 4.623613  | -0.161658 | C                              | 3.307952  | -2.888897 | 0.851741  |
| H | -2.113488 | 4.838298  | 0.919428  | H                              | 2.474599  | -2.688689 | 1.554938  |
| C | -2.593868 | 5.589725  | -1.059024 | H                              | 3.679930  | -3.919326 | 1.054111  |
| H | -2.983655 | 6.545818  | -0.674199 | C                              | 3.751116  | -3.307455 | -1.537047 |
| C | -2.579819 | 5.337585  | -2.444616 | H                              | 4.705962  | -2.812082 | -1.287377 |
| H | -2.959888 | 6.096744  | -3.147109 | H                              | 3.922243  | -4.398991 | -1.394896 |
| C | -2.080462 | 4.115488  | -2.928066 | C                              | 3.378181  | -2.992545 | -2.981291 |
| H | -2.066553 | 3.911753  | -4.010869 | H                              | 4.181156  | -3.356534 | -3.654916 |
| C | -1.598891 | 3.144557  | -2.030505 | H                              | 2.430269  | -3.476523 | -3.290557 |
| H | -1.214863 | 2.180395  | -2.399731 | H                              | 3.262103  | -1.899061 | -3.131360 |
| C | 0.267285  | 3.022208  | 1.547784  | C                              | 1.594414  | -3.882465 | -0.573237 |
| C | 0.924868  | 4.175578  | 1.063760  | H                              | 1.846034  | -4.733636 | 0.097194  |
| H | 0.623140  | 4.625074  | 0.105094  | H                              | 1.541263  | -4.282248 | -1.603952 |
| C | 1.971889  | 4.760951  | 1.798330  | C                              | 0.257035  | -3.271315 | -0.221063 |
| H | 2.477479  | 5.656474  | 1.402872  | H                              | 0.206472  | -2.902111 | 0.820786  |
| C | 2.370459  | 4.208990  | 3.028478  | H                              | -0.558910 | -4.006542 | -0.368837 |
| H | 3.192409  | 4.667386  | 3.601251  | H                              | -1.484044 | 0.469940  | -1.354066 |
| C | 1.708677  | 3.071185  | 3.527161  | 2b <sup>+</sup> (acetonitrile) |           |           |           |
| H | 2.007070  | 2.635437  | 4.494154  | Ni                             | 2.008944  | -1.024230 | -0.970177 |
| C | 0.667271  | 2.480659  | 2.792812  | Fe                             | -0.499822 | 0.107187  | -0.226579 |
| H | 0.175853  | 1.581091  | 3.192166  | S                              | 1.111875  | 0.787786  | -1.854062 |
| C | -2.439486 | -1.869244 | 1.787641  | S                              | 0.010355  | -1.859552 | -1.386854 |
| C | -2.614026 | -3.237961 | 1.481874  | P                              | -0.987207 | 2.110834  | 0.547603  |
| H | -2.850612 | -3.547346 | 0.451934  | P                              | -2.447763 | -0.580651 | 0.458683  |
| C | -2.486960 | -4.214357 | 2.485022  | O                              | 0.850678  | -0.742854 | 2.243357  |
| H | -2.626292 | -5.277405 | 2.230418  | N                              | 3.544759  | 0.074277  | -0.262963 |
| C | -2.186371 | -3.836664 | 3.806445  | N                              | 2.720899  | -2.875113 | -0.530690 |
| H | -2.088851 | -4.602151 | 4.592949  | C                              | 0.404419  | -0.373878 | 1.212110  |
| C | -2.011223 | -2.475684 | 4.118864  | C                              | -2.415054 | 1.913378  | 1.745320  |
| H | -1.775656 | -2.170605 | 5.151169  | H                              | -1.970270 | 1.570339  | 2.701745  |
| C | -2.129829 | -1.498237 | 3.116190  | H                              | -2.902204 | 2.891819  | 1.932643  |
| H | -1.968483 | -0.441065 | 3.376204  | C                              | -3.389479 | 0.879016  | 1.180976  |
| C | -3.664508 | -1.266144 | -0.756906 | H                              | -3.961221 | 1.302811  | 0.328073  |
| C | -3.395799 | -1.273551 | -2.140696 | H                              | -4.117102 | 0.521786  | 1.937840  |
| H | -2.424952 | -0.898180 | -2.500306 | C                              | -1.601066 | 3.392298  | -0.638999 |
| C | -4.361796 | -1.743391 | -3.049478 | C                              | -2.101271 | 4.626108  | -0.158455 |
| H | -4.138575 | -1.747702 | -4.128515 | H                              | -2.105394 | 4.840409  | 0.922692  |
| C | -5.605916 | -2.203140 | -2.582692 | C                              | -2.582845 | 5.593316  | -1.056142 |
| H | -6.362325 | -2.570822 | -3.294688 | H                              | -2.971776 | 6.549751  | -0.671410 |
| C | -5.883878 | -2.191263 | -1.202243 | C                              | -2.566977 | 5.342047  | -2.441967 |
| H | -6.858737 | -2.545937 | -0.830708 | H                              | -2.944884 | 6.102151  | -3.144514 |
| C | -4.919044 | -1.727747 | -0.292398 | C                              | -2.067919 | 4.119725  | -2.925433 |
| H | -5.143407 | -1.729791 | 0.786554  | H                              | -2.052150 | 3.916612  | -4.008304 |
| C | 2.329854  | 2.032859  | -1.237472 | C                              | -1.588793 | 3.147887  | -2.027437 |
| H | 3.033169  | 2.253035  | -2.066370 | H                              | -1.204067 | 2.183853  | -2.396245 |
| H | 1.799276  | 2.971732  | -0.989646 | C                              | 0.277476  | 3.022098  | 1.547660  |
| C | 3.010333  | 1.467188  | -0.015877 | C                              | 0.933439  | 4.175205  | 1.060650  |
| H | 2.264790  | 1.376089  | 0.796801  | H                              | 0.630327  | 4.622465  | 0.101500  |
| H | 3.823950  | 2.129741  | 0.351827  | C                              | 1.981582  | 4.762736  | 1.791889  |
| C | 4.625692  | 0.092558  | -1.316920 | H                              | 2.485557  | 5.657755  | 1.393316  |
| H | 4.137834  | 0.382045  | -2.267432 | C                              | 2.383286  | 4.212983  | 3.022030  |
| H | 4.954078  | -0.951660 | -1.456578 | H                              | 3.206176  | 4.672797  | 3.592242  |
| C | 5.839550  | 0.983186  | -1.045861 | C                              | 1.723760  | 3.074952  | 3.523455  |
| H | 6.551397  | 0.865646  | -1.888884 | H                              | 2.025314  | 2.640790  | 4.490144  |

|                         |           |           |           |    |           |           |           |
|-------------------------|-----------|-----------|-----------|----|-----------|-----------|-----------|
| C                       | 0.681146  | 2.482135  | 2.792357  | Fe | -0.517340 | 0.146639  | -0.260318 |
| H                       | 0.192361  | 1.582200  | 3.194184  | S  | 1.146815  | 0.731637  | -1.871792 |
| C                       | -2.447082 | -1.868864 | 1.784152  | S  | -0.124768 | -1.843350 | -1.428213 |
| C                       | -2.614262 | -3.236001 | 1.466930  | P  | -0.871153 | 2.174865  | 0.522975  |
| H                       | -2.843688 | -3.538452 | 0.433298  | P  | -2.501434 | -0.415612 | 0.427214  |
| C                       | -2.487520 | -4.219822 | 2.462841  | O  | 0.755732  | -0.834753 | 2.197408  |
| H                       | -2.620265 | -5.281403 | 2.198960  | N  | 3.508210  | -0.131536 | -0.249043 |
| C                       | -2.195012 | -3.851046 | 3.788698  | N  | 2.505210  | -3.021268 | -0.537660 |
| H                       | -2.097921 | -4.622258 | 4.569590  | C  | 0.349029  | -0.414301 | 1.166549  |
| C                       | -2.028040 | -2.491641 | 4.112658  | C  | -2.368337 | 2.108899  | 1.649384  |
| H                       | -1.799336 | -2.193584 | 5.148517  | H  | -1.998549 | 1.780585  | 2.641488  |
| C                       | -2.146454 | -1.506497 | 3.117237  | H  | -2.798687 | 3.123506  | 1.770060  |
| H                       | -1.992430 | -0.450809 | 3.387498  | C  | -3.378004 | 1.116711  | 1.071694  |
| C                       | -3.671588 | -1.252423 | -0.755522 | H  | -3.885162 | 1.546349  | 0.181834  |
| C                       | -3.401361 | -1.263527 | -2.139037 | H  | -4.157022 | 0.823580  | 1.804498  |
| H                       | -2.427451 | -0.895313 | -2.497891 | C  | -1.302306 | 3.522038  | -0.669281 |
| C                       | -4.369149 | -1.728550 | -3.048538 | C  | -1.671681 | 4.801408  | -0.189720 |
| H                       | -4.144447 | -1.735894 | -4.127226 | H  | -1.678278 | 5.007318  | 0.892997  |
| C                       | -5.616713 | -2.179965 | -2.582558 | C  | -2.020359 | 5.821566  | -1.089777 |
| H                       | -6.374679 | -2.543668 | -3.294854 | H  | -2.307636 | 6.813403  | -0.706235 |
| C                       | -5.895929 | -2.165089 | -1.202275 | C  | -2.001685 | 5.577441  | -2.476667 |
| H                       | -6.873235 | -2.513727 | -0.831559 | H  | -2.274698 | 6.379208  | -3.181003 |
| C                       | -4.929185 | -1.706546 | -0.291760 | C  | -1.634541 | 4.308914  | -2.958700 |
| H                       | -5.154355 | -1.706955 | 0.787045  | H  | -1.618534 | 4.111252  | -4.042266 |
| C                       | 2.332841  | 2.025829  | -1.238110 | C  | -1.287966 | 3.284320  | -2.058617 |
| H                       | 3.039381  | 2.241871  | -2.065252 | H  | -1.006101 | 2.285424  | -2.426906 |
| H                       | 1.804789  | 2.967104  | -0.994015 | C  | 0.433905  | 2.937072  | 1.591814  |
| C                       | 3.008606  | 1.459953  | -0.014103 | C  | 1.232048  | 4.016970  | 1.152422  |
| H                       | 2.260669  | 1.368483  | 0.796345  | H  | 1.009278  | 4.520298  | 0.199204  |
| H                       | 3.821311  | 2.121993  | 0.356188  | C  | 2.324856  | 4.455244  | 1.921480  |
| C                       | 4.627904  | 0.085363  | -1.310299 | H  | 2.942658  | 5.291813  | 1.558670  |
| H                       | 4.141053  | 0.360544  | -2.265476 | C  | 2.628389  | 3.829522  | 3.143088  |
| H                       | 4.966939  | -0.957024 | -1.437444 | H  | 3.488439  | 4.169507  | 3.741234  |
| C                       | 5.831223  | 0.991247  | -1.043047 | C  | 1.822384  | 2.770534  | 3.601407  |
| H                       | 6.551648  | 0.868115  | -1.877793 | H  | 2.044825  | 2.280486  | 4.562421  |
| H                       | 5.557107  | 2.064700  | -1.000344 | C  | 0.734580  | 2.325813  | 2.832826  |
| H                       | 6.364103  | 0.727329  | -0.106913 | H  | 0.131178  | 1.482282  | 3.200193  |
| C                       | 4.010953  | -0.434385 | 1.065539  | C  | -2.562632 | -1.642930 | 1.806155  |
| H                       | 4.847117  | 0.206694  | 1.420794  | C  | -2.763044 | -3.016682 | 1.542063  |
| H                       | 3.167593  | -0.277507 | 1.764769  | H  | -2.994459 | -3.353420 | 0.519714  |
| C                       | 4.428531  | -1.898089 | 1.112101  | C  | -2.665045 | -3.963138 | 2.576319  |
| H                       | 4.786800  | -2.091834 | 2.145010  | H  | -2.822958 | -5.030362 | 2.353731  |
| H                       | 5.306054  | -2.090538 | 0.461125  | C  | -2.367922 | -3.550110 | 3.887855  |
| C                       | 3.300516  | -2.895632 | 0.851893  | H  | -2.291642 | -4.292072 | 4.698362  |
| H                       | 2.464283  | -2.694682 | 1.551352  | C  | -2.167670 | -2.183904 | 4.159004  |
| H                       | 3.670130  | -3.926668 | 1.054900  | H  | -1.934197 | -1.851182 | 5.182804  |
| C                       | 3.754324  | -3.310949 | -1.535924 | C  | -2.257822 | -1.236072 | 3.125383  |
| H                       | 4.708223  | -2.816619 | -1.280879 | H  | -2.074294 | -0.175548 | 3.354597  |
| H                       | 3.923696  | -4.402777 | -1.395003 | C  | -3.743824 | -1.080088 | -0.769129 |
| C                       | 3.388419  | -2.993133 | -2.981355 | C  | -3.481159 | -1.109704 | -2.153840 |
| H                       | 4.196960  | -3.350807 | -3.651541 | H  | -2.502058 | -0.765149 | -2.521322 |
| H                       | 2.445015  | -3.481517 | -3.297753 | C  | -4.462956 | -1.564501 | -3.052997 |
| H                       | 3.268273  | -1.899594 | -3.128313 | H  | -4.244926 | -1.587261 | -4.132509 |
| C                       | 1.593469  | -3.886516 | -0.581724 | C  | -5.716221 | -1.987070 | -2.575635 |
| H                       | 1.846560  | -4.743118 | 0.081159  | H  | -6.484420 | -2.343983 | -3.279889 |
| H                       | 1.537709  | -4.277959 | -1.615474 | C  | -5.988012 | -1.951655 | -1.194522 |
| C                       | 0.257180  | -3.277279 | -0.221914 | H  | -6.969764 | -2.276693 | -0.815157 |
| H                       | 0.211730  | -2.910259 | 0.820965  | C  | -5.007892 | -1.502379 | -0.293994 |
| H                       | -0.558546 | -4.012834 | -0.367746 | H  | -5.227745 | -1.484364 | 0.785569  |
| H                       | -1.482930 | 0.470544  | -1.354213 | C  | 2.429488  | 1.892570  | -1.232717 |
| 2b <sup>+</sup> (water) |           |           |           | H  | 3.158757  | 2.066977  | -2.049472 |
| Ni                      | 1.915163  | -1.131363 | -0.976571 | H  | 1.953319  | 2.862530  | -0.994539 |

|                            |           |           |           |   |           |           |           |
|----------------------------|-----------|-----------|-----------|---|-----------|-----------|-----------|
| C                          | 3.055342  | 1.283953  | -0.002344 | C | -0.295290 | 4.344000  | 0.961066  |
| H                          | 2.296705  | 1.236340  | 0.801560  | H | -0.806270 | 4.649346  | 0.034743  |
| H                          | 3.901818  | 1.895583  | 0.379091  | C | 0.571145  | 5.248911  | 1.600032  |
| C                          | 4.601744  | -0.185309 | -1.283579 | H | 0.729868  | 6.248193  | 1.163894  |
| H                          | 4.148614  | 0.132636  | -2.242116 | C | 1.230266  | 4.881774  | 2.786572  |
| H                          | 4.869965  | -1.247046 | -1.419414 | H | 1.910351  | 5.591059  | 3.284809  |
| C                          | 5.861455  | 0.631051  | -0.991988 | C | 1.010954  | 3.605555  | 3.337846  |
| H                          | 6.578409  | 0.469978  | -1.822868 | H | 1.516902  | 3.310798  | 4.271205  |
| H                          | 5.660429  | 1.719735  | -0.934936 | C | 0.150385  | 2.697140  | 2.699370  |
| H                          | 6.364616  | 0.316056  | -0.055516 | H | 0.008535  | 1.698205  | 3.136480  |
| C                          | 3.928433  | -0.670607 | 1.082587  | C | -3.116715 | -2.259445 | -0.552483 |
| H                          | 4.802007  | -0.086157 | 1.445166  | C | -3.028108 | -2.162911 | -1.956122 |
| H                          | 3.093290  | -0.459053 | 1.776481  | H | -2.267809 | -1.503060 | -2.401694 |
| C                          | 4.249184  | -2.158122 | 1.129916  | C | -3.905543 | -2.896953 | -2.775520 |
| H                          | 4.580702  | -2.376996 | 2.166435  | H | -3.823078 | -2.816320 | -3.871370 |
| H                          | 5.120700  | -2.404097 | 0.489035  | C | -4.883352 | -3.726429 | -2.198756 |
| C                          | 3.064493  | -3.082208 | 0.851574  | H | -5.570351 | -4.300946 | -2.840839 |
| H                          | 2.232564  | -2.833250 | 1.540104  | C | -4.985042 | -3.818720 | -0.797275 |
| H                          | 3.368129  | -4.134636 | 1.053649  | H | -5.753294 | -4.462053 | -0.338888 |
| C                          | 3.522305  | -3.513767 | -1.532788 | C | -4.107481 | -3.090587 | 0.023170  |
| H                          | 4.502706  | -3.083181 | -1.262759 | H | -4.193808 | -3.173700 | 1.118700  |
| H                          | 3.620919  | -4.614923 | -1.398391 | C | -1.459250 | -2.456976 | 1.820433  |
| C                          | 3.195205  | -3.163206 | -2.979510 | C | -1.310103 | -3.832682 | 1.530990  |
| H                          | 3.974101  | -3.588971 | -3.644469 | H | -1.648629 | -4.235853 | 0.564209  |
| H                          | 2.214334  | -3.566417 | -3.301435 | C | -0.743229 | -4.705452 | 2.476588  |
| H                          | 3.172215  | -2.063373 | -3.124838 | H | -0.632305 | -5.774024 | 2.231562  |
| C                          | 1.320848  | -3.964096 | -0.608252 | C | -0.327695 | -4.219457 | 3.729254  |
| H                          | 1.512764  | -4.834051 | 0.057646  | H | 0.115445  | -4.903845 | 4.470319  |
| H                          | 1.258353  | -4.352291 | -1.642819 | C | -0.488180 | -2.854761 | 4.033054  |
| C                          | 0.017967  | -3.278371 | -0.266810 | H | -0.172760 | -2.464859 | 5.014183  |
| H                          | -0.019767 | -2.915093 | 0.777244  | C | -1.043402 | -1.978978 | 3.085298  |
| H                          | -0.838705 | -3.962054 | -0.430098 | H | -1.138572 | -0.912005 | 3.335262  |
| H                          | -1.485122 | 0.583746  | -1.381625 | C | 1.734512  | 2.730778  | -1.278979 |
| 2bd <sup>+</sup> (acetone) |           |           |           | H | 2.297878  | 3.137870  | -2.143222 |
| Ni                         | 2.035846  | -0.323054 | -1.041883 | H | 1.035878  | 3.515883  | -0.933251 |
| Fe                         | -0.512366 | 0.066355  | -0.315167 | C | 2.633573  | 2.292947  | -0.146926 |
| S                          | 0.769543  | 1.287420  | -1.909299 | H | 2.014310  | 2.059134  | 0.739943  |
| S                          | 0.371424  | -1.527167 | -1.855175 | H | 3.339348  | 3.101722  | 0.145374  |
| P                          | -1.515267 | 1.783682  | 0.605267  | C | 4.274286  | 1.214734  | -1.700548 |
| P                          | -2.030615 | -1.242466 | 0.545413  | H | 4.761077  | 0.238192  | -1.881605 |
| O                          | 1.258014  | -0.194067 | 2.027234  | H | 3.603795  | 1.377740  | -2.565952 |
| N                          | 3.395944  | 1.039319  | -0.484866 | C | 5.325169  | 2.324423  | -1.630181 |
| N                          | 2.939421  | -2.004336 | -0.412036 | H | 5.884829  | 2.333160  | -2.588195 |
| C                          | 0.657833  | -0.099937 | 1.008966  | H | 4.872300  | 3.328696  | -1.502887 |
| C                          | -2.661560 | 1.124286  | 1.930905  | H | 6.063568  | 2.167029  | -0.818170 |
| H                          | -2.029338 | 0.937801  | 2.822775  | C | 4.187541  | 0.676601  | 0.730594  |
| H                          | -3.416484 | 1.887681  | 2.208023  | H | 4.960249  | 1.457587  | 0.896460  |
| C                          | -3.304158 | -0.168637 | 1.426610  | H | 3.485786  | 0.730312  | 1.585191  |
| H                          | -4.073149 | 0.051259  | 0.655771  | C | 4.830987  | -0.705184 | 0.703721  |
| H                          | -3.788234 | -0.746935 | 2.239787  | H | 5.473428  | -0.779330 | 1.605959  |
| C                          | -2.622677 | 2.819345  | -0.458752 | H | 5.518874  | -0.825955 | -0.158698 |
| C                          | -2.630771 | 2.660793  | -1.859524 | C | 3.813920  | -1.837987 | 0.789392  |
| H                          | -1.977111 | 1.899583  | -2.314178 | H | 3.137296  | -1.648788 | 1.644388  |
| C                          | -3.469048 | 3.457458  | -2.661118 | H | 4.327558  | -2.802434 | 0.990378  |
| H                          | -3.465361 | 3.323819  | -3.754863 | C | 3.723495  | -2.484295 | -1.609928 |
| C                          | -4.309296 | 4.416207  | -2.068167 | H | 4.483979  | -1.708685 | -1.817495 |
| H                          | -4.968846 | 5.037499  | -2.695284 | H | 3.036325  | -2.469002 | -2.477199 |
| C                          | -4.304630 | 4.582279  | -0.669694 | C | 4.391046  | -3.855343 | -1.487238 |
| H                          | -4.958640 | 5.334045  | -0.199268 | H | 4.928739  | -4.064242 | -2.435090 |
| C                          | -3.463552 | 3.792435  | 0.131615  | H | 5.137056  | -3.899478 | -0.668132 |
| H                          | -3.454480 | 3.947513  | 1.222864  | H | 3.656134  | -4.672181 | -1.338009 |
| C                          | -0.508819 | 3.054106  | 1.499179  | C | 1.842804  | -2.963371 | -0.026361 |

|                             |           |           |           |                           |           |           |           |
|-----------------------------|-----------|-----------|-----------|---------------------------|-----------|-----------|-----------|
| H                           | 1.322559  | -2.522844 | 0.845534  | H                         | -5.284484 | -3.299720 | -4.320823 |
| H                           | 2.281834  | -3.930913 | 0.303544  | C                         | -5.320986 | -2.715833 | -2.220798 |
| C                           | 0.849082  | -3.163699 | -1.147109 | H                         | -6.316615 | -3.149096 | -2.033132 |
| H                           | -0.058338 | -3.677147 | -0.776420 | C                         | -4.631498 | -2.078410 | -1.175998 |
| H                           | 1.258595  | -3.766288 | -1.983634 | H                         | -5.095481 | -2.019057 | -0.178045 |
| H                           | -1.681308 | 0.190594  | -1.307961 | C                         | 2.528355  | 2.015179  | -0.841639 |
| 2bdd <sup>+</sup> (acetone) |           |           |           | H                         | 3.321236  | 2.279587  | -1.570661 |
| Ni                          | 2.224120  | -1.039930 | -0.532483 | H                         | 1.915844  | 2.923040  | -0.665050 |
| Fe                          | -0.470111 | 0.149358  | -0.369539 | C                         | 3.077049  | 1.479853  | 0.458883  |
| S                           | 1.467098  | 0.721610  | -1.618586 | H                         | 2.251300  | 1.394952  | 1.188364  |
| S                           | 0.303777  | -1.898335 | -1.177588 | H                         | 3.837795  | 2.162799  | 0.897403  |
| P                           | -1.280634 | 2.171584  | -0.113583 | C                         | 4.851608  | 0.065177  | -0.571585 |
| P                           | -2.493361 | -0.611153 | -0.028877 | H                         | 4.503964  | 0.384146  | -1.573097 |
| O                           | 0.465090  | -0.195308 | 2.399928  | H                         | 5.150570  | -0.992490 | -0.681739 |
| N                           | 3.644395  | 0.091486  | 0.327284  | C                         | 6.053693  | 0.901135  | -0.128950 |
| N                           | 2.834299  | -2.870537 | 0.122484  | H                         | 6.856176  | 0.785823  | -0.886498 |
| C                           | 0.152935  | -0.059034 | 1.270130  | H                         | 5.819777  | 1.982835  | -0.058604 |
| C                           | -3.115845 | 2.064365  | -0.447388 | H                         | 6.467457  | 0.567149  | 0.844233  |
| H                           | -3.635784 | 3.001182  | -0.159885 | C                         | 3.926312  | -0.357667 | 1.727560  |
| H                           | -3.199424 | 1.957968  | -1.549464 | H                         | 4.690098  | 0.317044  | 2.172593  |
| C                           | -3.665190 | 0.829507  | 0.271808  | H                         | 2.985182  | -0.196468 | 2.289787  |
| H                           | -4.684254 | 0.558069  | -0.070388 | C                         | 4.352118  | -1.808398 | 1.891670  |
| H                           | -3.707954 | 0.991695  | 1.367842  | H                         | 4.598561  | -1.950001 | 2.964887  |
| C                           | -0.702166 | 3.491659  | -1.269451 | H                         | 5.293813  | -2.022321 | 1.344862  |
| C                           | -0.595495 | 3.160474  | -2.640377 | C                         | 3.256680  | -2.817951 | 1.559376  |
| H                           | -0.861549 | 2.143632  | -2.972261 | H                         | 2.347926  | -2.576067 | 2.148292  |
| C                           | -0.139762 | 4.112871  | -3.566272 | H                         | 3.590631  | -3.837920 | 1.857867  |
| H                           | -0.060909 | 3.844064  | -4.631978 | C                         | 3.962791  | -3.381529 | -0.732514 |
| C                           | 0.226522  | 5.401568  | -3.132506 | H                         | 4.889215  | -2.872665 | -0.410692 |
| H                           | 0.595135  | 6.144753  | -3.857728 | H                         | 4.102969  | -4.462265 | -0.500611 |
| C                           | 0.121503  | 5.736589  | -1.770781 | C                         | 3.761921  | -3.160485 | -2.227757 |
| H                           | 0.402506  | 6.744635  | -1.425488 | H                         | 4.623052  | -3.590490 | -2.779802 |
| C                           | -0.343382 | 4.788269  | -0.840504 | H                         | 2.838675  | -3.640618 | -2.609344 |
| H                           | -0.423180 | 5.064814  | 0.222168  | H                         | 3.699362  | -2.077511 | -2.463525 |
| C                           | -1.154802 | 2.944979  | 1.561553  | C                         | 1.690781  | -3.860175 | 0.019381  |
| C                           | -2.277777 | 3.300859  | 2.340953  | H                         | 1.830395  | -4.657006 | 0.782668  |
| H                           | -3.299351 | 3.184291  | 1.950490  | H                         | 1.746981  | -4.346175 | -0.973593 |
| C                           | -2.107469 | 3.819142  | 3.638881  | C                         | 0.346324  | -3.180635 | 0.155226  |
| H                           | -2.994151 | 4.085711  | 4.236327  | H                         | 0.201508  | -2.695142 | 1.140020  |
| C                           | -0.818343 | 4.001690  | 4.168771  | H                         | -0.480025 | -3.901500 | -0.004897 |
| H                           | -0.689606 | 4.408741  | 5.184477  | H                         | -1.155041 | 0.388883  | -1.735706 |
| C                           | 0.306792  | 3.663516  | 3.393119  | 2c <sup>+</sup> (acetone) |           |           |           |
| H                           | 1.322695  | 3.807461  | 3.794539  | Ni                        | 2.076740  | -1.005565 | -0.174260 |
| C                           | 0.136380  | 3.132783  | 2.105287  | Fe                        | -0.378576 | 0.034258  | -0.205375 |
| H                           | 1.018916  | 2.865280  | 1.507204  | S                         | 0.272533  | -2.261452 | -0.396548 |
| C                           | -2.716476 | -1.702172 | 1.444212  | S                         | 1.004660  | -0.418918 | 1.696360  |
| C                           | -2.842072 | -3.104889 | 1.331358  | P                         | -1.150409 | 2.020300  | 0.295471  |
| H                           | -2.919405 | -3.576133 | 0.339422  | P                         | -2.300238 | -0.734182 | 0.717193  |
| C                           | -2.865243 | -3.911446 | 2.483014  | O                         | 1.279945  | 1.334525  | -2.216636 |
| H                           | -2.964544 | -5.003988 | 2.379270  | N                         | 2.797674  | -1.788980 | -1.887401 |
| C                           | -2.763166 | -3.328560 | 3.759035  | N                         | 3.608471  | 0.179222  | 0.341037  |
| H                           | -2.783226 | -3.961872 | 4.660455  | C                         | 0.740162  | 0.744655  | -1.338777 |
| C                           | -2.631211 | -1.932111 | 3.878887  | C                         | -2.371811 | 1.873018  | 1.699984  |
| H                           | -2.544187 | -1.467046 | 4.873996  | H                         | -1.782188 | 1.664904  | 2.616396  |
| C                           | -2.599960 | -1.124349 | 2.730184  | H                         | -2.913718 | 2.831573  | 1.838486  |
| H                           | -2.464539 | -0.035927 | 2.839100  | C                         | -3.310403 | 0.709522  | 1.370584  |
| C                           | -3.350889 | -1.517955 | -1.400392 | H                         | -4.007362 | 0.986039  | 0.550994  |
| C                           | -2.784475 | -1.595435 | -2.689156 | H                         | -3.918165 | 0.393500  | 2.242347  |
| H                           | -1.799537 | -1.137131 | -2.868826 | C                         | -2.175778 | 2.878664  | -0.995783 |
| C                           | -3.476592 | -2.234249 | -3.734610 | C                         | -2.705846 | 2.154785  | -2.083510 |
| H                           | -3.021192 | -2.288147 | -4.736568 | H                         | -2.445827 | 1.088963  | -2.192304 |
| C                           | -4.743206 | -2.798352 | -3.502348 | C                         | -3.550874 | 2.784835  | -3.015340 |

|   |           |           |           |                                |           |           |           |
|---|-----------|-----------|-----------|--------------------------------|-----------|-----------|-----------|
| H | -3.957271 | 2.207076  | -3.861090 | C                              | 4.471979  | -0.664277 | 1.246849  |
| C | -3.872078 | 4.145716  | -2.867940 | H                              | 4.858326  | -1.496887 | 0.629731  |
| H | -4.530833 | 4.641313  | -3.599170 | H                              | 3.801079  | -1.130541 | 1.993663  |
| C | -3.347842 | 4.874789  | -1.782945 | C                              | 5.629211  | 0.052851  | 1.944427  |
| H | -3.595792 | 5.941745  | -1.662415 | H                              | 6.169648  | -0.687107 | 2.570103  |
| C | -2.505676 | 4.246660  | -0.850111 | H                              | 6.362319  | 0.479186  | 1.230114  |
| H | -2.100849 | 4.827312  | -0.005266 | H                              | 5.281786  | 0.863343  | 2.616732  |
| C | 0.012726  | 3.358253  | 0.805365  | C                              | 3.006821  | 1.356396  | 1.058425  |
| C | 0.838805  | 3.941575  | -0.185069 | H                              | 2.377156  | 1.884302  | 0.318231  |
| H | 0.738400  | 3.633340  | -1.236960 | H                              | 3.807659  | 2.059594  | 1.377862  |
| C | 1.791116  | 4.912179  | 0.163389  | C                              | 2.145236  | 0.934408  | 2.224997  |
| H | 2.430024  | 5.354044  | -0.617869 | H                              | 1.550204  | 1.794089  | 2.588150  |
| C | 1.929287  | 5.317817  | 1.504695  | H                              | 2.737457  | 0.546467  | 3.078863  |
| H | 2.678247  | 6.077970  | 1.778507  | H                              | -1.177891 | -0.049448 | -1.460721 |
| C | 1.100552  | 4.756012  | 2.491211  | 2c <sup>+</sup> (acetonitrile) |           |           |           |
| H | 1.194739  | 5.075407  | 3.541419  | Ni                             | 2.056355  | -1.028587 | -0.173694 |
| C | 0.145504  | 3.781095  | 2.146380  | Fe                             | -0.386678 | 0.035104  | -0.203613 |
| H | -0.487631 | 3.353013  | 2.938030  | S                              | 0.240870  | -2.265420 | -0.419442 |
| C | -3.493170 | -1.626618 | -0.372489 | S                              | 0.980282  | -0.453568 | 1.698344  |
| C | -3.207370 | -1.844162 | -1.735248 | P                              | -1.139542 | 2.027497  | 0.297540  |
| H | -2.251177 | -1.478263 | -2.142563 | P                              | -2.320041 | -0.717185 | 0.706758  |
| C | -4.134214 | -2.508485 | -2.559321 | O                              | 1.306089  | 1.341198  | -2.183320 |
| H | -3.898540 | -2.675135 | -3.622733 | N                              | 2.775528  | -1.796709 | -1.893771 |
| C | -5.355851 | -2.956473 | -2.026309 | N                              | 3.597277  | 0.134250  | 0.364081  |
| H | -6.082915 | -3.476222 | -2.670901 | C                              | 0.750835  | 0.744356  | -1.319773 |
| C | -5.648755 | -2.740541 | -0.665474 | C                              | -2.386667 | 1.893202  | 1.679400  |
| H | -6.604948 | -3.089760 | -0.243641 | H                              | -1.815862 | 1.680859  | 2.606496  |
| C | -4.722042 | -2.082560 | 0.160030  | H                              | -2.923558 | 2.855597  | 1.809512  |
| H | -4.953257 | -1.929060 | 1.226814  | C                              | -3.328905 | 0.737053  | 1.335567  |
| C | -2.130866 | -1.886026 | 2.148073  | H                              | -4.006215 | 1.016419  | 0.500626  |
| C | -2.094759 | -3.283758 | 1.934604  | H                              | -3.957754 | 0.429842  | 2.195529  |
| H | -2.281676 | -3.692568 | 0.929542  | C                              | -2.115821 | 2.913180  | -1.013112 |
| C | -1.831639 | -4.160132 | 3.002028  | C                              | -2.511143 | 2.251805  | -2.193228 |
| H | -1.812778 | -5.247099 | 2.821473  | H                              | -2.191527 | 1.208276  | -2.351014 |
| C | -1.598171 | -3.653799 | 4.293880  | C                              | -3.300440 | 2.914450  | -3.151506 |
| H | -1.394256 | -4.341725 | 5.130106  | H                              | -3.600722 | 2.386023  | -4.070644 |
| C | -1.627919 | -2.264012 | 4.512588  | C                              | -3.701440 | 4.244703  | -2.936292 |
| H | -1.447836 | -1.858403 | 5.521257  | H                              | -4.318158 | 4.765101  | -3.686656 |
| C | -1.884785 | -1.384187 | 3.446649  | C                              | -3.310372 | 4.912067  | -1.758860 |
| H | -1.890259 | -0.300585 | 3.639455  | H                              | -3.620300 | 5.955227  | -1.585626 |
| C | 0.538563  | -2.856467 | -2.124110 | C                              | -2.521340 | 4.252264  | -0.802097 |
| H | 0.802584  | -3.931543 | -2.049267 | H                              | -2.216082 | 4.785820  | 0.112997  |
| H | -0.411799 | -2.780963 | -2.689368 | C                              | 0.033694  | 3.347904  | 0.832371  |
| C | 1.619508  | -2.035808 | -2.792216 | C                              | 0.868959  | 3.938128  | -0.146272 |
| H | 1.213868  | -1.042292 | -3.055442 | H                              | 0.768621  | 3.647596  | -1.203254 |
| H | 1.961747  | -2.515696 | -3.735956 | C                              | 1.831955  | 4.891290  | 0.220892  |
| C | 3.465487  | -3.072283 | -1.454976 | H                              | 2.479122  | 5.337533  | -0.550970 |
| H | 4.277001  | -2.784814 | -0.760735 | C                              | 1.970417  | 5.273760  | 1.569068  |
| H | 2.731831  | -3.629424 | -0.841981 | H                              | 2.727820  | 6.019898  | 1.857669  |
| C | 4.013626  | -3.968481 | -2.567072 | C                              | 1.131292  | 4.706471  | 2.543728  |
| H | 4.458898  | -4.869415 | -2.096805 | H                              | 1.225311  | 5.007819  | 3.599243  |
| H | 3.220884  | -4.316036 | -3.260284 | C                              | 0.166667  | 3.747806  | 2.180311  |
| H | 4.810772  | -3.478929 | -3.162155 | H                              | -0.474394 | 3.314471  | 2.962393  |
| C | 3.734023  | -0.900899 | -2.642389 | C                              | -3.508784 | -1.613502 | -0.384987 |
| H | 4.138882  | -1.465671 | -3.509321 | C                              | -3.227931 | -1.813414 | -1.751504 |
| H | 3.118263  | -0.077510 | -3.052917 | H                              | -2.277054 | -1.434732 | -2.159585 |
| C | 4.869000  | -0.301594 | -1.821958 | C                              | -4.152253 | -2.478100 | -2.578245 |
| H | 5.538339  | 0.227169  | -2.532129 | H                              | -3.919600 | -2.631426 | -3.644274 |
| H | 5.497497  | -1.082537 | -1.345847 | C                              | -5.366649 | -2.944210 | -2.044085 |
| C | 4.381730  | 0.731212  | -0.812768 | H                              | -6.091491 | -3.464750 | -2.690484 |
| H | 3.707073  | 1.445610  | -1.324878 | C                              | -5.654987 | -2.745414 | -0.679548 |
| H | 5.237651  | 1.319779  | -0.417938 | H                              | -6.605554 | -3.108667 | -0.256913 |

|                         |           |           |           |   |           |           |           |
|-------------------------|-----------|-----------|-----------|---|-----------|-----------|-----------|
| C                       | -4.730810 | -2.086846 | 0.148472  | H | -2.832014 | 2.864301  | 1.891998  |
| H                       | -4.958611 | -1.946364 | 1.217766  | C | -3.281018 | 0.755681  | 1.405408  |
| C                       | -2.166414 | -1.859654 | 2.147090  | H | -3.983439 | 1.055852  | 0.599096  |
| C                       | -2.111394 | -3.257555 | 1.937028  | H | -3.881374 | 0.439150  | 2.281737  |
| H                       | -2.275439 | -3.669637 | 0.929406  | C | -2.153658 | 2.896062  | -0.959451 |
| C                       | -1.857083 | -4.129722 | 3.010050  | C | -2.749074 | 2.165005  | -2.008265 |
| H                       | -1.823233 | -5.216568 | 2.831281  | H | -2.528854 | 1.089112  | -2.103113 |
| C                       | -1.651478 | -3.619018 | 4.305092  | C | -3.609030 | 2.801634  | -2.921493 |
| H                       | -1.454136 | -4.303264 | 5.145826  | H | -4.066825 | 2.218754  | -3.736458 |
| C                       | -1.700774 | -2.229230 | 4.520763  | C | -3.879966 | 4.175510  | -2.794653 |
| H                       | -1.542910 | -1.820101 | 5.531697  | H | -4.549783 | 4.675870  | -3.511931 |
| C                       | -1.948852 | -1.353452 | 3.449089  | C | -3.291946 | 4.910862  | -1.747485 |
| H                       | -1.969822 | -0.270029 | 3.641344  | H | -3.501594 | 5.987265  | -1.642336 |
| C                       | 0.505601  | -2.837402 | -2.155181 | C | -2.435458 | 4.276228  | -0.832202 |
| H                       | 0.755947  | -3.916753 | -2.097747 | H | -1.982543 | 4.860329  | -0.014872 |
| H                       | -0.442455 | -2.740075 | -2.720784 | C | 0.080982  | 3.346546  | 0.799572  |
| C                       | 1.598366  | -2.018606 | -2.806722 | C | 0.892846  | 3.923259  | -0.206562 |
| H                       | 1.204109  | -1.017250 | -3.057562 | H | 0.748466  | 3.639208  | -1.259827 |
| H                       | 1.940344  | -2.488059 | -3.755686 | C | 1.889615  | 4.851922  | 0.130473  |
| C                       | 3.428249  | -3.092719 | -1.476146 | H | 2.519754  | 5.286533  | -0.661389 |
| H                       | 4.235988  | -2.824579 | -0.769703 | C | 2.085401  | 5.222750  | 1.474646  |
| H                       | 2.683695  | -3.653432 | -0.879917 | H | 2.872030  | 5.946689  | 1.739451  |
| C                       | 3.978743  | -3.975181 | -2.597904 | C | 1.265377  | 4.674214  | 2.475568  |
| H                       | 4.403649  | -4.892048 | -2.139773 | H | 1.403044  | 4.968984  | 3.527776  |
| H                       | 3.190699  | -4.296967 | -3.308653 | C | 0.265732  | 3.741102  | 2.142613  |
| H                       | 4.791670  | -3.486197 | -3.171678 | H | -0.359048 | 3.319310  | 2.943938  |
| C                       | 3.724252  | -0.909063 | -2.633420 | C | -3.522584 | -1.550794 | -0.374925 |
| H                       | 4.126114  | -1.467447 | -3.505688 | C | -3.233531 | -1.784646 | -1.734231 |
| H                       | 3.119033  | -0.074157 | -3.035946 | H | -2.264298 | -1.450206 | -2.137502 |
| C                       | 4.861891  | -0.332984 | -1.800538 | C | -4.175063 | -2.424433 | -2.560843 |
| H                       | 5.539055  | 0.198640  | -2.501038 | H | -3.937578 | -2.604080 | -3.621342 |
| H                       | 5.480909  | -1.126559 | -1.333265 | C | -5.413592 | -2.831122 | -2.033819 |
| C                       | 4.382696  | 0.691858  | -0.779060 | H | -6.151864 | -3.331250 | -2.680603 |
| H                       | 3.719626  | 1.422019  | -1.283970 | C | -5.709065 | -2.598961 | -0.676252 |
| H                       | 5.244118  | 1.263696  | -0.372093 | H | -6.678270 | -2.915971 | -0.259589 |
| C                       | 4.446764  | -0.729397 | 1.264044  | C | -4.767914 | -1.965758 | 0.152121  |
| H                       | 4.830792  | -1.555928 | 0.637793  | H | -5.000214 | -1.799077 | 1.216528  |
| H                       | 3.765921  | -1.200647 | 1.998527  | C | -2.156033 | -1.873354 | 2.133069  |
| C                       | 5.604272  | -0.032660 | 1.981740  | C | -2.159108 | -3.268289 | 1.900786  |
| H                       | 6.135877  | -0.787544 | 2.596981  | H | -2.366207 | -3.657835 | 0.892056  |
| H                       | 6.344829  | 0.401760  | 1.280059  | C | -1.908996 | -4.165019 | 2.954345  |
| H                       | 5.258003  | 0.767290  | 2.667164  | H | -1.920917 | -5.249465 | 2.760490  |
| C                       | 3.004705  | 1.308633  | 1.093910  | C | -1.649444 | -3.681306 | 4.249944  |
| H                       | 2.385471  | 1.854571  | 0.358031  | H | -1.456306 | -4.384878 | 5.075192  |
| H                       | 3.811626  | 1.998025  | 1.427660  | C | -1.639269 | -2.294081 | 4.486485  |
| C                       | 2.133141  | 0.879678  | 2.250440  | H | -1.437839 | -1.906770 | 5.497933  |
| H                       | 1.545711  | 1.740103  | 2.623849  | C | -1.882808 | -1.393876 | 3.434639  |
| H                       | 2.717563  | 0.472959  | 3.100804  | H | -1.856823 | -0.312879 | 3.639881  |
| H                       | -1.187874 | -0.034767 | -1.458331 | C | 0.505070  | -2.842358 | -2.147544 |
| 2c <sup>+</sup> (water) |           |           |           | H | 0.764887  | -3.919033 | -2.085152 |
| Ni                      | 2.060009  | -1.025179 | -0.180080 | H | -0.445022 | -2.754701 | -2.711226 |
| Fe                      | -0.375298 | 0.037008  | -0.200858 | C | 1.589676  | -2.019734 | -2.806522 |
| S                       | 0.243379  | -2.265999 | -0.413055 | H | 1.189565  | -1.020814 | -3.057357 |
| S                       | 0.996868  | -0.456401 | 1.700694  | H | 1.925730  | -2.489577 | -3.757378 |
| P                       | -1.113939 | 2.031162  | 0.313693  | C | 3.430065  | -3.088210 | -1.488508 |
| P                       | -2.308140 | -0.698641 | 0.720881  | H | 4.252882  | -2.818129 | -0.800315 |
| O                       | 1.289490  | 1.343800  | -2.198629 | H | 2.697177  | -3.644571 | -0.873840 |
| N                       | 2.772082  | -1.793870 | -1.901910 | C | 3.955931  | -3.977981 | -2.615694 |
| N                       | 3.600096  | 0.139950  | 0.347421  | H | 4.399612  | -4.886478 | -2.159573 |
| C                       | 0.749366  | 0.742770  | -1.325099 | H | 3.150572  | -4.311065 | -3.301070 |
| C                       | -2.313802 | 1.895579  | 1.736322  | H | 4.748840  | -3.487674 | -3.215347 |
| H                       | -1.714782 | 1.663566  | 2.640950  | C | 3.714745  | -0.906583 | -2.649647 |



|                            |           |           |           |                             |           |           |           |
|----------------------------|-----------|-----------|-----------|-----------------------------|-----------|-----------|-----------|
| H                          | 4.118024  | -1.468795 | -3.518837 | C                           | 0.212393  | 3.757370  | 1.405462  |
| H                          | 3.104804  | -0.077796 | -3.056936 | H                           | -0.258344 | 4.041071  | 0.452201  |
| C                          | 4.851698  | -0.318187 | -1.824934 | C                           | -0.221046 | 4.361332  | 2.597943  |
| H                          | 5.518400  | 0.218503  | -2.531193 | H                           | -1.025842 | 5.113373  | 2.564473  |
| H                          | 5.481196  | -1.104638 | -1.359802 | C                           | 0.369945  | 4.011672  | 3.826195  |
| C                          | 4.368747  | 0.703670  | -0.803179 | H                           | 0.029803  | 4.487083  | 4.760166  |
| H                          | 3.692538  | 1.424147  | -1.304099 | C                           | 1.400448  | 3.054738  | 3.853398  |
| H                          | 5.226717  | 1.286990  | -0.405212 | H                           | 1.874000  | 2.777092  | 4.808831  |
| C                          | 4.461080  | -0.725049 | 1.233612  | C                           | 1.833598  | 2.444317  | 2.663259  |
| H                          | 4.820672  | -1.562936 | 0.607677  | H                           | 2.633061  | 1.689746  | 2.714461  |
| H                          | 3.794075  | -1.182319 | 1.989234  | C                           | 1.615304  | 3.131714  | -1.440991 |
| C                          | 5.642237  | -0.033610 | 1.915440  | C                           | 1.147380  | 2.805736  | -2.730381 |
| H                          | 6.175714  | -0.785456 | 2.532166  | H                           | 0.755629  | 1.790816  | -2.909057 |
| H                          | 6.372273  | 0.378672  | 1.190248  | C                           | 1.190035  | 3.756805  | -3.765810 |
| H                          | 5.319402  | 0.782786  | 2.592582  | H                           | 0.819611  | 3.489156  | -4.768533 |
| C                          | 3.012880  | 1.310527  | 1.087959  | C                           | 1.701263  | 5.043498  | -3.519513 |
| H                          | 2.386969  | 1.857811  | 0.359072  | H                           | 1.731926  | 5.791095  | -4.328532 |
| H                          | 3.821393  | 2.000454  | 1.416605  | C                           | 2.176586  | 5.374013  | -2.235649 |
| C                          | 2.154541  | 0.873099  | 2.250809  | H                           | 2.582192  | 6.379409  | -2.038196 |
| H                          | 1.570791  | 1.729263  | 2.638399  | C                           | 2.136530  | 4.424476  | -1.200575 |
| H                          | 2.749234  | 0.459455  | 3.090512  | H                           | 2.509989  | 4.693703  | -0.199305 |
| H                          | -1.173369 | -0.024560 | -1.458078 | C                           | -2.270612 | 1.398461  | -2.306234 |
| 2cd <sup>+</sup> (acetone) |           |           |           | H                           | -3.015294 | 2.219832  | -2.344176 |
| Ni                         | -2.368474 | -0.220770 | 0.342293  | H                           | -1.526665 | 1.576401  | -3.107651 |
| Fe                         | 0.393297  | -0.034491 | -0.473807 | C                           | -2.893246 | 0.029579  | -2.459226 |
| S                          | -1.436404 | 1.497688  | -0.664271 | H                           | -2.091295 | -0.712009 | -2.625751 |
| S                          | -0.589876 | -0.100881 | 1.653408  | H                           | -3.570557 | -0.013191 | -3.340608 |
| P                          | 2.325577  | -1.067836 | -0.386949 | C                           | -4.815333 | 0.484444  | -0.939025 |
| P                          | 1.635220  | 1.847371  | -0.108916 | H                           | -4.405242 | 1.491031  | -0.729189 |
| O                          | -0.745998 | -2.541024 | -1.441394 | H                           | -5.259507 | 0.139710  | 0.011280  |
| N                          | -3.636462 | -0.410430 | -1.223611 | C                           | -5.895723 | 0.560918  | -2.019131 |
| N                          | -3.219899 | -1.555021 | 1.618455  | H                           | -6.685488 | 1.258368  | -1.671308 |
| C                          | -0.370961 | -1.503137 | -1.019871 | H                           | -5.510467 | 0.953016  | -2.982243 |
| C                          | 3.659029  | 0.155140  | -0.877167 | H                           | -6.380052 | -0.418827 | -2.207084 |
| H                          | 4.660707  | -0.301505 | -0.739187 | C                           | -4.023948 | -1.835469 | -1.463253 |
| H                          | 3.520035  | 0.391580  | -1.952607 | H                           | -4.724399 | -1.875137 | -2.325909 |
| C                          | 3.454561  | 1.404185  | -0.015844 | H                           | -3.097700 | -2.354827 | -1.775296 |
| H                          | 4.069016  | 2.262518  | -0.355085 | C                           | -4.622131 | -2.571244 | -0.273226 |
| H                          | 3.712396  | 1.196498  | 1.043166  | H                           | -4.911455 | -3.579979 | -0.635887 |
| C                          | 2.515258  | -2.496570 | -1.533229 | H                           | -5.569137 | -2.101261 | 0.063833  |
| C                          | 2.858210  | -2.294121 | -2.888094 | C                           | -3.652100 | -2.789479 | 0.885972  |
| H                          | 3.093898  | -1.285662 | -3.262164 | H                           | -2.728125 | -3.271259 | 0.505645  |
| C                          | 2.893085  | -3.381500 | -3.779703 | H                           | -4.114385 | -3.482643 | 1.625273  |
| H                          | 3.169247  | -3.212795 | -4.833009 | C                           | -4.396322 | -0.927307 | 2.317899  |
| C                          | 2.577978  | -4.676929 | -3.330642 | H                           | -5.246846 | -0.924500 | 1.612501  |
| H                          | 2.607015  | -5.527334 | -4.030682 | H                           | -4.689114 | -1.598321 | 3.157657  |
| C                          | 2.220323  | -4.881457 | -1.985051 | C                           | -4.147677 | 0.494209  | 2.810840  |
| H                          | 1.964049  | -5.891746 | -1.627492 | H                           | -5.052163 | 0.860148  | 3.339208  |
| C                          | 2.183632  | -3.797802 | -1.091847 | H                           | -3.292846 | 0.558876  | 3.513284  |
| H                          | 1.893430  | -3.967267 | -0.042562 | H                           | -3.935888 | 1.178563  | 1.962929  |
| C                          | 3.042645  | -1.689318 | 1.210739  | C                           | -2.221550 | -1.976676 | 2.679842  |
| C                          | 4.140828  | -2.581803 | 1.227933  | H                           | -2.463502 | -3.009401 | 3.013440  |
| H                          | 4.537182  | -2.993262 | 0.286018  | H                           | -2.351532 | -1.311341 | 3.554716  |
| C                          | 4.734246  | -2.949362 | 2.447551  | C                           | -0.794805 | -1.860556 | 2.192150  |
| H                          | 5.584866  | -3.649985 | 2.449765  | H                           | -0.570595 | -2.534280 | 1.342416  |
| C                          | 4.249455  | -2.423676 | 3.661056  | H                           | -0.078338 | -2.079535 | 3.010136  |
| H                          | 4.717910  | -2.714759 | 4.615005  | H                           | 0.780686  | 0.161951  | -1.922192 |
| C                          | 3.169918  | -1.523385 | 3.649163  | 2cdd <sup>+</sup> (acetone) |           |           |           |
| H                          | 2.787309  | -1.098589 | 4.591034  | Ni                          | 2.079309  | -1.001246 | -0.176530 |
| C                          | 2.571450  | -1.160389 | 2.428996  | Fe                          | -0.378834 | 0.032486  | -0.207499 |
| H                          | 1.729773  | -0.450551 | 2.416948  | S                           | 0.278720  | -2.261175 | -0.401799 |
| C                          | 1.246955  | 2.791180  | 1.424921  | S                           | 1.004835  | -0.419175 | 1.694092  |

|   |           |           |           |                                 |           |           |           |
|---|-----------|-----------|-----------|---------------------------------|-----------|-----------|-----------|
| P | -1.154622 | 2.016373  | 0.297002  | C                               | 3.477618  | -3.059902 | -1.454702 |
| P | -2.298215 | -0.740843 | 0.716567  | H                               | 4.262551  | -2.772604 | -0.730291 |
| O | 1.275828  | 1.337800  | -2.218524 | H                               | 2.732609  | -3.636116 | -0.874097 |
| N | 2.804032  | -1.780408 | -1.889307 | C                               | 4.076163  | -3.930735 | -2.560754 |
| N | 3.608240  | 0.187345  | 0.342351  | H                               | 4.494404  | -4.845219 | -2.091791 |
| C | 0.737688  | 0.746471  | -1.340661 | H                               | 3.317662  | -4.257290 | -3.301081 |
| C | -2.371080 | 1.864082  | 1.705296  | H                               | 4.904022  | -3.429810 | -3.101978 |
| H | -1.778098 | 1.654892  | 2.619333  | C                               | 3.735687  | -0.886421 | -2.642441 |
| H | -2.914170 | 2.821423  | 1.847558  | H                               | 4.138854  | -1.445198 | -3.514122 |
| C | -3.308849 | 0.699773  | 1.376158  | H                               | 3.116910  | -0.062042 | -3.046300 |
| H | -4.009007 | 0.977025  | 0.559541  | C                               | 4.871140  | -0.289734 | -1.820826 |
| H | -3.913295 | 0.380859  | 2.249168  | H                               | 5.540896  | 0.240730  | -2.529320 |
| C | -2.188471 | 2.871651  | -0.989564 | H                               | 5.498791  | -1.072443 | -1.346566 |
| C | -2.729358 | 2.143173  | -2.068966 | C                               | 4.383420  | 0.741015  | -0.809456 |
| H | -2.471576 | 1.076580  | -2.175321 | H                               | 3.709781  | 1.456846  | -1.320979 |
| C | -3.582163 | 2.769773  | -2.995999 | H                               | 5.239175  | 1.328357  | -0.412456 |
| H | -3.997134 | 2.188359  | -3.835062 | C                               | 4.472038  | -0.652756 | 1.251136  |
| C | -3.900212 | 4.131827  | -2.852377 | H                               | 4.865909  | -1.482102 | 0.634564  |
| H | -4.564956 | 4.624752  | -3.579992 | H                               | 3.800284  | -1.123954 | 1.994082  |
| C | -3.365181 | 4.865435  | -1.775766 | C                               | 5.622291  | 0.069272  | 1.955209  |
| H | -3.610616 | 5.933311  | -1.658153 | H                               | 6.164366  | -0.669297 | 2.581127  |
| C | -2.515483 | 4.240689  | -0.847440 | H                               | 6.355892  | 0.501575  | 1.244998  |
| H | -2.102642 | 4.824886  | -0.008962 | H                               | 5.267503  | 0.875978  | 2.628233  |
| C | 0.005760  | 3.357804  | 0.804005  | C                               | 3.001516  | 1.362877  | 1.058027  |
| C | 0.828656  | 3.942900  | -0.188041 | H                               | 2.370973  | 1.888218  | 0.316740  |
| H | 0.727290  | 3.634050  | -1.239652 | H                               | 3.799462  | 2.069042  | 1.378228  |
| C | 1.778976  | 4.916180  | 0.158412  | C                               | 2.140021  | 0.938230  | 2.223767  |
| H | 2.415367  | 5.359434  | -0.624123 | H                               | 1.541452  | 1.795819  | 2.585989  |
| C | 1.918401  | 5.322701  | 1.499322  | H                               | 2.732611  | 0.552777  | 3.078509  |
| H | 2.665876  | 6.084896  | 1.771552  | H                               | -1.177436 | -0.051362 | -1.463440 |
| C | 1.092762  | 4.759184  | 2.487463  | 3a <sup>2+</sup> (acetonitrile) |           |           |           |
| H | 1.187883  | 5.079251  | 3.537391  | Ni                              | 1.647539  | -1.060766 | -1.039016 |
| C | 0.139632  | 3.781693  | 2.144636  | Fe                              | -0.485102 | -0.213134 | 0.212044  |
| H | -0.491160 | 3.352436  | 2.937567  | S                               | 0.243373  | 0.421960  | -1.898512 |
| C | -3.492007 | -1.632104 | -0.372987 | S                               | -0.236119 | -2.197933 | -0.903839 |
| C | -3.206543 | -1.849470 | -1.735852 | P                               | -0.339356 | 1.727937  | 1.275568  |
| H | -2.250193 | -1.484018 | -2.143254 | P                               | -2.679628 | 0.029185  | 0.288962  |
| C | -4.134067 | -2.512837 | -2.559941 | O                               | -0.554053 | -1.477048 | 2.829712  |
| H | -3.898784 | -2.679257 | -3.623485 | N                               | 3.168442  | 0.199057  | -1.357857 |
| C | -5.355951 | -2.960063 | -2.026825 | N                               | 2.604665  | -2.588566 | -0.173007 |
| H | -6.083593 | -3.478942 | -2.671480 | C                               | -0.549543 | -0.972323 | 1.772502  |
| C | -5.648384 | -2.744490 | -0.665821 | C                               | -1.914671 | 1.878438  | 2.269483  |
| H | -6.604744 | -3.093170 | -0.243895 | H                               | -1.794611 | 1.185093  | 3.128093  |
| C | -4.721006 | -2.087473 | 0.159709  | H                               | -2.021904 | 2.907479  | 2.666868  |
| H | -4.951856 | -1.934158 | 1.226612  | C                               | -3.107455 | 1.488131  | 1.388534  |
| C | -2.124847 | -1.895838 | 2.144387  | H                               | -3.366326 | 2.320871  | 0.704911  |
| C | -2.087187 | -3.292981 | 1.927376  | H                               | -4.013143 | 1.261002  | 1.984998  |
| H | -2.275131 | -3.699542 | 0.921575  | C                               | -0.214486 | 3.301878  | 0.330815  |
| C | -1.821243 | -4.171624 | 2.992239  | C                               | -1.138777 | 3.555389  | -0.712330 |
| H | -1.801213 | -5.258133 | 2.809010  | H                               | -1.911868 | 2.818239  | -0.977350 |
| C | -1.586445 | -3.668123 | 4.284971  | C                               | -1.042275 | 4.733564  | -1.470370 |
| H | -1.380321 | -4.357826 | 5.119202  | H                               | -1.766363 | 4.918270  | -2.279379 |
| C | -1.617780 | -2.278917 | 4.507175  | C                               | -0.011815 | 5.657922  | -1.214606 |
| H | -1.436676 | -1.875569 | 5.516577  | H                               | 0.069776  | 6.575349  | -1.818735 |
| C | -1.877553 | -1.396813 | 3.443821  | C                               | 0.921267  | 5.399453  | -0.195156 |
| H | -1.884245 | -0.313648 | 3.639203  | H                               | 1.738108  | 6.111638  | 0.002144  |
| C | 0.546307  | -2.853347 | -2.130162 | C                               | 0.822035  | 4.228718  | 0.578170  |
| H | 0.809059  | -3.928854 | -2.057248 | H                               | 1.566360  | 4.036825  | 1.365443  |
| H | -0.403393 | -2.775859 | -2.696315 | C                               | 1.021592  | 1.734605  | 2.501257  |
| C | 1.628499  | -2.032538 | -2.796457 | C                               | 1.051591  | 2.625117  | 3.597334  |
| H | 1.222228  | -1.040188 | -3.063236 | H                               | 0.257230  | 3.377089  | 3.726249  |
| H | 1.973988  | -2.514321 | -3.738124 | C                               | 2.105920  | 2.550334  | 4.524089  |

|   |           |           |           |                  |           |           |           |
|---|-----------|-----------|-----------|------------------|-----------|-----------|-----------|
| H | 2.129947  | 3.243694  | 5.379721  | H                | -0.451325 | -3.693459 | 1.025010  |
| C | 3.126981  | 1.593740  | 4.362664  | H                | 0.350786  | -4.474214 | -0.375621 |
| H | 3.949301  | 1.539780  | 5.093828  | 3a <sup>2+</sup> | (water)   |           |           |
| C | 3.096434  | 0.704500  | 3.272591  | Ni               | -1.750430 | -1.055355 | 1.048393  |
| H | 3.890182  | -0.048498 | 3.145223  | Fe               | 0.567287  | -0.194439 | -0.221638 |
| C | 2.043832  | 0.773048  | 2.345516  | S                | -0.351313 | 0.444020  | 1.920760  |
| H | 1.995760  | 0.074860  | 1.489046  | S                | 0.165055  | -2.171373 | 0.947008  |
| C | -3.550764 | 0.315536  | -1.306541 | P                | 0.467433  | 1.740282  | -1.298077 |
| C | -3.082499 | -0.299797 | -2.488352 | P                | 2.756917  | 0.035289  | -0.220026 |
| H | -2.182798 | -0.931229 | -2.465794 | O                | 0.730444  | -1.498894 | -2.809217 |
| C | -3.766406 | -0.113432 | -3.701546 | N                | -3.266130 | 0.217025  | 1.289989  |
| H | -3.390409 | -0.597091 | -4.616836 | N                | -2.654755 | -2.569471 | 0.119813  |
| C | -4.920127 | 0.689608  | -3.745280 | C                | 0.690345  | -0.976794 | -1.759140 |
| H | -5.451511 | 0.842317  | -4.698038 | C                | 2.089006  | 1.907043  | -2.208133 |
| C | -5.397924 | 1.293806  | -2.567959 | H                | 2.016111  | 1.210751  | -3.070083 |
| H | -6.306808 | 1.915726  | -2.593138 | H                | 2.211564  | 2.937908  | -2.595275 |
| C | -4.722231 | 1.107611  | -1.349822 | C                | 3.233599  | 1.517858  | -1.261580 |
| H | -5.124736 | 1.577397  | -0.439712 | H                | 3.434439  | 2.337329  | -0.542709 |
| C | -3.498846 | -1.452945 | 1.007484  | H                | 4.178439  | 1.317785  | -1.804358 |
| C | -3.761010 | -2.568748 | 0.180278  | C                | 0.255323  | 3.295244  | -0.341546 |
| H | -3.560641 | -2.519924 | -0.901524 | C                | 1.117135  | 3.556282  | 0.751575  |
| C | -4.282197 | -3.748539 | 0.736427  | H                | 1.899106  | 2.838395  | 1.041653  |
| H | -4.489130 | -4.612251 | 0.084864  | C                | 0.945124  | 4.716841  | 1.522935  |
| C | -4.542531 | -3.825139 | 2.117851  | H                | 1.620481  | 4.909139  | 2.371005  |
| H | -4.952157 | -4.751047 | 2.551871  | C                | -0.100190 | 5.613277  | 1.230785  |
| C | -4.278804 | -2.717024 | 2.943111  | H                | -0.241843 | 6.515332  | 1.846350  |
| H | -4.479486 | -2.771264 | 4.024905  | C                | -0.972023 | 5.345541  | 0.160892  |
| C | -3.754276 | -1.533781 | 2.394555  | H                | -1.800233 | 6.035297  | -0.064838 |
| H | -3.535022 | -0.684168 | 3.059129  | C                | -0.796943 | 4.193226  | -0.626265 |
| C | 1.422216  | 1.833453  | -2.091191 | H                | -1.493180 | 3.991667  | -1.454139 |
| H | 1.667237  | 1.861532  | -3.171523 | C                | -0.856036 | 1.722492  | -2.562375 |
| H | 0.925335  | 2.786019  | -1.835646 | C                | -0.837044 | 2.574961  | -3.687672 |
| C | 2.631070  | 1.596832  | -1.217003 | H                | -0.015821 | 3.295639  | -3.826525 |
| H | 3.431564  | 2.333999  | -1.444689 | C                | -1.878747 | 2.504375  | -4.628970 |
| H | 2.356423  | 1.724872  | -0.152965 | H                | -1.865190 | 3.167534  | -5.508081 |
| C | 3.554858  | -0.137142 | -2.782254 | C                | -2.936308 | 1.592016  | -4.450009 |
| H | 2.623064  | -0.193245 | -3.379113 | H                | -3.750113 | 1.543229  | -5.190572 |
| H | 3.962490  | -1.164408 | -2.760358 | C                | -2.954395 | 0.740534  | -3.329725 |
| C | 4.549270  | 0.809395  | -3.455374 | H                | -3.778442 | 0.023718  | -3.188198 |
| H | 4.756403  | 0.421755  | -4.473760 | C                | -1.913397 | 0.800852  | -2.389216 |
| H | 4.147365  | 1.836538  | -3.566713 | H                | -1.909547 | 0.129002  | -1.509040 |
| H | 5.517120  | 0.864019  | -2.917979 | C                | 3.558893  | 0.272470  | 1.417183  |
| C | 4.333844  | 0.076589  | -0.428157 | C                | 3.011433  | -0.338614 | 2.566281  |
| H | 4.015063  | 0.513158  | 0.537043  | H                | 2.092915  | -0.937890 | 2.489158  |
| H | 5.155369  | 0.716258  | -0.814437 | C                | 3.639756  | -0.186312 | 3.813467  |
| C | 4.835442  | -1.342590 | -0.195610 | H                | 3.203976  | -0.666088 | 4.703627  |
| H | 5.746545  | -1.261768 | 0.432544  | C                | 4.814604  | 0.578781  | 3.922554  |
| H | 5.167457  | -1.827515 | -1.136546 | H                | 5.302735  | 0.704270  | 4.901759  |
| C | 3.845172  | -2.207855 | 0.572729  | C                | 5.367973  | 1.181703  | 2.777948  |
| H | 4.340587  | -3.137777 | 0.923145  | H                | 6.292124  | 1.775494  | 2.856353  |
| H | 3.509684  | -1.663653 | 1.476411  | C                | 4.748251  | 1.030273  | 1.525896  |
| C | 2.894932  | -3.529688 | -1.321595 | H                | 5.205563  | 1.498482  | 0.640968  |
| H | 3.570926  | -2.988846 | -2.009553 | C                | 3.563193  | -1.447806 | -0.946912 |
| H | 1.948467  | -3.672332 | -1.879164 | C                | 3.624532  | -2.630185 | -0.173975 |
| C | 3.492364  | -4.886638 | -0.949169 | H                | 3.295629  | -2.627240 | 0.877289  |
| H | 3.655260  | -5.458473 | -1.885473 | C                | 4.100883  | -3.819534 | -0.747723 |
| H | 4.472985  | -4.796016 | -0.440758 | H                | 4.148848  | -4.736212 | -0.139445 |
| H | 2.815051  | -5.486382 | -0.308419 | C                | 4.512909  | -3.839495 | -2.094027 |
| C | 1.656461  | -3.180441 | 0.834888  | H                | 4.884107  | -4.773979 | -2.543213 |
| H | 1.528724  | -2.408803 | 1.615657  | C                | 4.446965  | -2.665379 | -2.865179 |
| H | 2.124527  | -4.065669 | 1.317796  | H                | 4.765138  | -2.676856 | -3.919391 |
| C | 0.312038  | -3.550106 | 0.234648  | C                | 3.968679  | -1.470470 | -2.299051 |

|                                  |           |           |           |   |           |           |           |
|----------------------------------|-----------|-----------|-----------|---|-----------|-----------|-----------|
| H                                | 3.901521  | -0.567305 | -2.924507 | C | 0.301645  | 3.601812  | 4.049748  |
| C                                | -1.531970 | 1.857660  | 2.054312  | H | 0.074219  | 2.805881  | 4.776608  |
| H                                | -1.815017 | 1.904866  | 3.124791  | C | 0.169004  | 0.564406  | 3.394413  |
| H                                | -1.026315 | 2.805677  | 1.799029  | C | -0.779488 | -0.165779 | 4.142085  |
| C                                | -2.711328 | 1.609460  | 1.144281  | H | -1.848765 | -0.118272 | 3.894994  |
| H                                | -3.515076 | 2.355427  | 1.329124  | C | -0.367997 | -0.964635 | 5.225248  |
| H                                | -2.397011 | 1.716186  | 0.089208  | H | -1.121052 | -1.529588 | 5.797135  |
| C                                | -3.713553 | -0.090906 | 2.702822  | C | 0.991740  | -1.048917 | 5.570511  |
| H                                | -2.805748 | -0.149511 | 3.335518  | H | 1.310345  | -1.677282 | 6.417310  |
| H                                | -4.133464 | -1.114103 | 2.681111  | C | 1.945562  | -0.326337 | 4.826719  |
| C                                | -4.717348 | 0.881459  | 3.322477  | H | 3.013753  | -0.381595 | 5.089983  |
| H                                | -4.973631 | 0.510186  | 4.335462  | C | 1.535810  | 0.474015  | 3.748834  |
| H                                | -4.299818 | 1.901709  | 3.437839  | H | 2.284836  | 1.062433  | 3.200589  |
| H                                | -5.660487 | 0.947237  | 2.744152  | C | -1.676500 | 3.971403  | -1.432299 |
| C                                | -4.394566 | 0.093708  | 0.315779  | C | -0.450435 | 4.534351  | -1.839444 |
| H                                | -4.041050 | 0.534637  | -0.635726 | H | 0.486129  | 3.984679  | -1.657972 |
| H                                | -5.232846 | 0.728979  | 0.671756  | C | -0.420844 | 5.791737  | -2.470552 |
| C                                | -4.880984 | -1.325037 | 0.054233  | H | 0.543379  | 6.222122  | -2.785302 |
| H                                | -5.767458 | -1.243018 | -0.607625 | C | -1.617887 | 6.493837  | -2.697987 |
| H                                | -5.243741 | -1.820750 | 0.977818  | H | -1.595744 | 7.478555  | -3.191919 |
| C                                | -3.854755 | -2.174844 | -0.681994 | C | -2.846822 | 5.935385  | -2.294730 |
| H                                | -4.330099 | -3.096909 | -1.078059 | H | -3.787160 | 6.481731  | -2.472673 |
| H                                | -3.472488 | -1.611616 | -1.555289 | C | -2.878420 | 4.678580  | -1.667316 |
| C                                | -3.002193 | -3.525058 | 1.237578  | H | -3.844414 | 4.243143  | -1.362926 |
| H                                | -3.700014 | -2.986737 | 1.906310  | C | -2.918720 | 1.386477  | -1.582703 |
| H                                | -2.080719 | -3.686988 | 1.830343  | C | -2.861070 | 1.480052  | -2.992093 |
| C                                | -3.597458 | -4.868479 | 0.818427  | H | -2.157080 | 2.180984  | -3.468942 |
| H                                | -3.791090 | -5.459424 | 1.736529  | C | -3.696581 | 0.683058  | -3.793544 |
| H                                | -4.562188 | -4.758339 | 0.284359  | H | -3.640576 | 0.765792  | -4.890904 |
| H                                | -2.905040 | -5.456986 | 0.183642  | C | -4.606233 | -0.209053 | -3.195134 |
| C                                | -1.659607 | -3.146072 | -0.853436 | H | -5.269294 | -0.827587 | -3.821024 |
| H                                | -1.491096 | -2.360611 | -1.613581 | C | -4.666148 | -0.307657 | -1.793197 |
| H                                | -2.107190 | -4.021207 | -1.372938 | H | -5.375354 | -1.002793 | -1.320285 |
| C                                | -0.345655 | -3.529202 | -0.199966 | C | -3.817575 | 0.473145  | -0.988407 |
| H                                | 0.447408  | -3.678034 | -0.959446 | H | -3.859713 | 0.356825  | 0.105435  |
| H                                | -0.418653 | -4.449545 | 0.412661  | C | 3.441539  | 2.106149  | 0.905231  |
| 3ad <sup>2+</sup> (acetonitrile) |           |           |           | H | 4.319648  | 2.761492  | 0.737811  |
| Ni                               | 2.507454  | 0.481352  | -1.556952 | H | 2.970106  | 2.408170  | 1.862287  |
| Fe                               | 0.084094  | 1.231773  | -0.121231 | C | 3.805364  | 0.636063  | 0.917083  |
| S                                | 2.239486  | 2.395255  | -0.462788 | H | 4.652348  | 0.433645  | 1.610470  |
| S                                | 0.601477  | 1.162144  | -2.438002 | H | 2.931808  | 0.046125  | 1.263534  |
| P                                | -0.318175 | 1.688548  | 2.011983  | C | 5.243047  | 0.869810  | -1.136091 |
| P                                | -1.716558 | 2.340545  | -0.551815 | H | 4.893020  | 1.909644  | -1.280036 |
| O                                | -1.382043 | -1.264683 | -0.371080 | H | 5.336370  | 0.441668  | -2.153159 |
| N                                | 4.125584  | 0.115366  | -0.459349 | C | 6.595849  | 0.861520  | -0.422536 |
| N                                | 2.424446  | -1.160014 | -2.709263 | H | 7.302150  | 1.485010  | -1.008401 |
| C                                | -0.606000 | -0.372791 | -0.118442 | H | 6.535523  | 1.296735  | 0.595794  |
| C                                | -2.178939 | 1.823620  | 2.152937  | H | 7.035744  | -0.153269 | -0.345628 |
| H                                | -2.576136 | 0.795284  | 2.016062  | C | 4.448133  | -1.333580 | -0.304810 |
| H                                | -2.470856 | 2.192795  | 3.157477  | H | 3.647227  | -1.761784 | 0.331364  |
| C                                | -2.651863 | 2.751362  | 1.030937  | H | 5.398548  | -1.429253 | 0.262224  |
| H                                | -2.403095 | 3.808333  | 1.263139  | C | 4.517772  | -2.118214 | -1.607491 |
| H                                | -3.745396 | 2.689591  | 0.860113  | H | 4.958196  | -3.109448 | -1.376812 |
| C                                | 0.237094  | 3.338692  | 2.661685  | H | 5.204023  | -1.647208 | -2.341165 |
| C                                | 0.524636  | 4.377261  | 1.750720  | C | 3.135510  | -2.367908 | -2.190685 |
| H                                | 0.479585  | 4.174801  | 0.671286  | H | 3.181146  | -3.130178 | -2.997087 |
| C                                | 0.876441  | 5.657323  | 2.213798  | H | 2.489795  | -2.783290 | -1.393880 |
| H                                | 1.098145  | 6.456533  | 1.488454  | C | 3.004787  | -0.701214 | -4.026468 |
| C                                | 0.947809  | 5.910943  | 3.595338  | H | 4.069533  | -0.468624 | -3.828255 |
| H                                | 1.229574  | 6.911535  | 3.960807  | H | 2.523238  | 0.263373  | -4.279540 |
| C                                | 0.658187  | 4.880982  | 4.510912  | C | 2.875966  | -1.668342 | -5.205106 |
| H                                | 0.709928  | 5.074320  | 5.594561  | H | 3.356608  | -1.201707 | -6.089488 |

|                                 |           |           |           |   |           |           |           |
|---------------------------------|-----------|-----------|-----------|---|-----------|-----------|-----------|
| H                               | 3.383654  | -2.637578 | -5.026443 | H | -3.970886 | 0.499500  | 1.105654  |
| H                               | 1.818046  | -1.868258 | -5.470868 | H | -3.655030 | -0.337789 | 2.664222  |
| C                               | 0.971274  | -1.543655 | -2.801894 | C | -2.302755 | 2.994392  | -0.232649 |
| H                               | 0.675940  | -1.855530 | -1.782915 | C | -3.649463 | 3.288626  | 0.069504  |
| H                               | 0.854211  | -2.430686 | -3.464022 | H | -4.110618 | 2.938378  | 1.005014  |
| C                               | 0.083734  | -0.407286 | -3.265132 | C | -4.426331 | 4.040138  | -0.832198 |
| H                               | -0.973998 | -0.610109 | -3.004331 | H | -5.478060 | 4.259187  | -0.588545 |
| H                               | 0.146357  | -0.226557 | -4.357054 | C | -3.866893 | 4.508105  | -2.033771 |
| H                               | 0.565878  | -0.641724 | 0.215096  | H | -4.479636 | 5.093346  | -2.737689 |
| C                               | -5.211745 | -2.956029 | 0.521001  | C | -2.522107 | 4.221921  | -2.337292 |
| C                               | -4.934771 | -2.225396 | 1.737240  | H | -2.076203 | 4.580357  | -3.278401 |
| C                               | -4.134412 | -3.662597 | -0.102340 | C | -1.747328 | 3.463113  | -1.446993 |
| C                               | -2.851786 | -3.621727 | 0.436953  | H | -0.705944 | 3.216615  | -1.707237 |
| C                               | -2.559429 | -2.882160 | 1.650906  | C | -0.085117 | 3.124095  | 1.670916  |
| C                               | -3.665333 | -2.204801 | 2.270003  | C | 0.046098  | 4.465024  | 1.243013  |
| C                               | -0.133819 | -4.068476 | 0.495187  | H | -0.578119 | 4.854109  | 0.425168  |
| C                               | -0.221901 | -3.243712 | 1.684959  | C | 0.984402  | 5.314896  | 1.854732  |
| C                               | 1.083941  | -4.580715 | 0.049896  | H | 1.078811  | 6.355806  | 1.506950  |
| C                               | 2.297698  | -4.308958 | 0.760109  | C | 1.795299  | 4.841717  | 2.901160  |
| C                               | 2.224760  | -3.457247 | 1.924568  | H | 2.533098  | 5.508599  | 3.374815  |
| C                               | 1.017007  | -2.951335 | 2.351427  | C | 1.654059  | 3.514623  | 3.346463  |
| N                               | -1.349410 | -2.737505 | 2.210713  | H | 2.277065  | 3.136546  | 4.172340  |
| H                               | -4.307576 | -4.222275 | -1.031427 | C | 0.721494  | 2.659477  | 2.737054  |
| H                               | -5.735589 | -1.675673 | 2.247613  | H | 0.631936  | 1.625951  | 3.102469  |
| H                               | -3.453850 | -1.645205 | 3.193615  | C | -1.669234 | -2.373440 | 2.046621  |
| H                               | 1.100751  | -5.211297 | -0.849259 | C | -1.684792 | -3.734400 | 1.666039  |
| H                               | 3.133950  | -3.203664 | 2.484024  | H | -2.035151 | -4.025252 | 0.663845  |
| H                               | 0.965651  | -2.310546 | 3.242087  | C | -1.253281 | -4.725803 | 2.563426  |
| S                               | -1.580980 | -4.495544 | -0.401836 | H | -1.270161 | -5.782819 | 2.253801  |
| N                               | 3.487062  | -4.827584 | 0.348122  | C | -0.807457 | -4.371067 | 3.849448  |
| N                               | -6.456185 | -2.947188 | -0.029786 | H | -0.470128 | -5.149256 | 4.552471  |
| C                               | -6.722498 | -3.682093 | -1.266998 | C | -0.798735 | -3.018452 | 4.236616  |
| H                               | -6.512715 | -4.765641 | -1.141820 | H | -0.457112 | -2.732218 | 5.244087  |
| H                               | -7.785535 | -3.562271 | -1.537902 | C | -1.223183 | -2.021846 | 3.341482  |
| H                               | -6.100501 | -3.298093 | -2.104363 | H | -1.197112 | -0.970742 | 3.664606  |
| C                               | 3.547349  | -5.709931 | -0.817433 | C | -3.374628 | -1.936700 | -0.253637 |
| H                               | 2.997657  | -6.659264 | -0.634452 | C | -2.978599 | -2.500530 | -1.466671 |
| H                               | 3.113012  | -5.218983 | -1.711978 | H | -1.940578 | -2.386488 | -1.814984 |
| H                               | 4.602316  | -5.950498 | -1.034351 | C | -3.905539 | -3.200431 | -2.257960 |
| C                               | -7.539600 | -2.170878 | 0.578262  | H | -3.583034 | -3.632310 | -3.218589 |
| H                               | -8.448140 | -2.277926 | -0.039379 | C | -5.236327 | -3.343587 | -1.825991 |
| H                               | -7.769612 | -2.532216 | 1.602921  | H | -5.964401 | -3.887998 | -2.448254 |
| H                               | -7.279964 | -1.092233 | 0.631822  | C | -5.634471 | -2.791835 | -0.594538 |
| C                               | 4.700253  | -4.642694 | 1.148090  | H | -6.673411 | -2.905960 | -0.246389 |
| H                               | 4.915588  | -3.568819 | 1.315135  | C | -4.710376 | -2.094008 | 0.202316  |
| H                               | 4.609180  | -5.141623 | 2.137130  | H | -5.040694 | -1.684014 | 1.168755  |
| H                               | 5.556400  | -5.083915 | 0.608990  | C | 2.180404  | 2.453828  | -0.850119 |
| 3b <sup>2+</sup> (acetonitrile) |           |           |           | H | 2.768972  | 2.900414  | -1.677118 |
| Ni                              | 2.327234  | -0.623912 | -1.007795 | H | 1.533795  | 3.246106  | -0.427536 |
| Fe                              | -0.478518 | 0.082201  | -0.173155 | C | 3.041536  | 1.838449  | 0.225445  |
| S                               | 1.141762  | 1.129776  | -1.602301 | H | 2.400758  | 1.544976  | 1.075773  |
| S                               | 0.444492  | -1.682945 | -1.426542 | H | 3.786138  | 2.564563  | 0.617604  |
| P                               | -1.250102 | 1.948434  | 0.855392  | C | 4.720374  | 0.893972  | -1.353130 |
| P                               | -2.151257 | -1.067568 | 0.838462  | H | 4.124106  | 1.201476  | -2.233870 |
| O                               | 1.220068  | -0.578123 | 2.102029  | H | 5.196684  | -0.062130 | -1.629153 |
| N                               | 3.739940  | 0.590005  | -0.247736 | C | 5.794203  | 1.937440  | -1.043353 |
| N                               | 3.284795  | -2.407469 | -0.822952 | H | 6.468902  | 2.009164  | -1.921077 |
| C                               | 0.590224  | -0.279259 | 1.156615  | H | 5.371269  | 2.947037  | -0.868301 |
| C                               | -2.324109 | 1.359423  | 2.251895  | H | 6.416868  | 1.658892  | -0.169212 |
| H                               | -1.616234 | 1.068913  | 3.054661  | C | 4.384158  | -0.008332 | 0.965351  |
| H                               | -2.940213 | 2.192513  | 2.647141  | H | 5.149389  | 0.702272  | 1.345868  |
| C                               | -3.173859 | 0.168911  | 1.803751  | H | 3.589055  | -0.068727 | 1.733871  |

|                          |           |           |           |                                 |           |           |           |
|--------------------------|-----------|-----------|-----------|---------------------------------|-----------|-----------|-----------|
| C                        | 5.002204  | -1.387363 | 0.783052  | C                               | 0.428843  | 3.200580  | 2.357882  |
| H                        | 5.487203  | -1.645843 | 1.747603  | H                               | 0.667674  | 2.247463  | 2.855655  |
| H                        | 5.826493  | -1.370671 | 0.040871  | C                               | -1.671044 | -2.935063 | 1.355019  |
| C                        | 3.997307  | -2.499421 | 0.493396  | C                               | -2.026562 | -4.011706 | 0.513525  |
| H                        | 3.213926  | -2.501267 | 1.278719  | H                               | -2.597471 | -3.830301 | -0.410177 |
| H                        | 4.516548  | -3.483341 | 0.532407  | C                               | -1.638785 | -5.319981 | 0.850670  |
| C                        | 4.256278  | -2.584768 | -1.962729 | H                               | -1.918348 | -6.156687 | 0.191685  |
| H                        | 5.163052  | -1.999661 | -1.729210 | C                               | -0.893004 | -5.558432 | 2.019222  |
| H                        | 4.567263  | -3.653679 | -1.974510 | H                               | -0.586173 | -6.584104 | 2.277277  |
| C                        | 3.709739  | -2.151743 | -3.318509 | C                               | -0.538309 | -4.485456 | 2.858528  |
| H                        | 4.468345  | -2.361619 | -4.100215 | H                               | 0.047136  | -4.668124 | 3.773032  |
| H                        | 2.779902  | -2.688732 | -3.594148 | C                               | -0.922713 | -3.175496 | 2.530335  |
| H                        | 3.490735  | -1.063604 | -3.332675 | H                               | -0.618700 | -2.339443 | 3.179711  |
| C                        | 2.285994  | -3.547024 | -0.891191 | C                               | -3.346549 | -1.294037 | -0.406601 |
| H                        | 2.684138  | -4.413166 | -0.320316 | C                               | -3.112167 | -0.824002 | -1.716520 |
| H                        | 2.199918  | -3.863473 | -1.948174 | H                               | -2.124699 | -0.431203 | -2.004101 |
| C                        | 0.919865  | -3.133856 | -0.388501 | C                               | -4.154020 | -0.815331 | -2.658632 |
| H                        | 0.922758  | -2.850800 | 0.681248  | H                               | -3.967485 | -0.427687 | -3.671723 |
| H                        | 0.175490  | -3.941109 | -0.536279 | C                               | -5.431018 | -1.281122 | -2.299389 |
| N                        | -1.704330 | 0.368118  | -1.635593 | H                               | -6.249953 | -1.265377 | -3.035521 |
| C                        | -2.479890 | 0.555441  | -2.488635 | C                               | -5.664810 | -1.763394 | -0.997683 |
| C                        | -3.473867 | 0.806582  | -3.508073 | H                               | -6.662969 | -2.133230 | -0.715490 |
| H                        | -4.160091 | -0.062898 | -3.579932 | C                               | -4.627669 | -1.771746 | -0.050802 |
| H                        | -2.983585 | 0.969334  | -4.489573 | H                               | -4.817549 | -2.151452 | 0.966071  |
| H                        | -4.052123 | 1.714116  | -3.234983 | C                               | 1.769362  | 2.622673  | -1.024248 |
| 3b <sup>2+</sup> (water) |           |           |           | H                               | 2.304662  | 3.061195  | -1.889547 |
| Ni                       | 2.318784  | -0.431531 | -0.893729 | H                               | 1.019389  | 3.355309  | -0.669038 |
| Fe                       | -0.334000 | -0.007940 | 0.013442  | C                               | 2.684012  | 2.207284  | 0.104282  |
| S                        | 0.922531  | 1.097823  | -1.621990 | H                               | 2.067122  | 1.901159  | 0.967345  |
| S                        | 0.581039  | -1.745786 | -1.238183 | H                               | 3.321375  | 3.053472  | 0.439131  |
| P                        | -1.439077 | 1.709888  | 0.907353  | C                               | 4.517288  | 1.345169  | -1.347671 |
| P                        | -2.007019 | -1.209270 | 0.852548  | H                               | 3.910181  | 1.565801  | -2.246804 |
| O                        | 1.196520  | -0.415932 | 2.409761  | H                               | 5.071909  | 0.419969  | -1.579785 |
| N                        | 3.545334  | 1.018458  | -0.242163 | C                               | 5.500382  | 2.481832  | -1.071152 |
| N                        | 3.487553  | -2.045301 | -0.565457 | H                               | 6.154345  | 2.594726  | -1.959615 |
| C                        | 0.595698  | -0.238807 | 1.410645  | H                               | 4.994355  | 3.453978  | -0.905839 |
| C                        | -2.209579 | 1.092629  | 2.481432  | H                               | 6.154905  | 2.270892  | -0.201793 |
| H                        | -1.374513 | 1.121651  | 3.210336  | C                               | 4.204215  | 0.608663  | 1.040311  |
| H                        | -2.979161 | 1.810738  | 2.828267  | H                               | 4.859437  | 1.439165  | 1.380467  |
| C                        | -2.748742 | -0.342380 | 2.341525  | H                               | 3.388643  | 0.515232  | 1.782799  |
| H                        | -3.848168 | -0.360080 | 2.209909  | C                               | 4.992526  | -0.691829 | 1.002986  |
| H                        | -2.510658 | -0.945517 | 3.238568  | H                               | 5.459581  | -0.805983 | 2.003151  |
| C                        | -2.787598 | 2.144692  | -0.259283 | H                               | 5.840194  | -0.633250 | 0.290012  |
| C                        | -4.148557 | 1.966798  | 0.076312  | C                               | 4.144738  | -1.941696 | 0.778307  |
| H                        | -4.447703 | 1.648936  | 1.085502  | H                               | 3.331917  | -1.978448 | 1.532316  |
| C                        | -5.142409 | 2.180812  | -0.893797 | H                               | 4.777466  | -2.846642 | 0.917216  |
| H                        | -6.199637 | 2.025135  | -0.629225 | C                               | 4.519367  | -2.172048 | -1.656601 |
| C                        | -4.790589 | 2.581763  | -2.194888 | H                               | 5.337961  | -1.463799 | -1.439348 |
| H                        | -5.573119 | 2.737056  | -2.953767 | H                               | 4.961649  | -3.190473 | -1.581003 |
| C                        | -3.437289 | 2.773847  | -2.528826 | C                               | 3.970878  | -1.908507 | -3.054185 |
| H                        | -3.154988 | 3.086902  | -3.545925 | H                               | 4.778586  | -2.064479 | -3.797528 |
| C                        | -2.438618 | 2.545066  | -1.570561 | H                               | 3.131543  | -2.583121 | -3.315864 |
| H                        | -1.380027 | 2.666733  | -1.847723 | H                               | 3.610651  | -0.863005 | -3.153927 |
| C                        | -0.592169 | 3.266340  | 1.380396  | C                               | 2.655226  | -3.314056 | -0.588711 |
| C                        | -0.883217 | 4.499291  | 0.755280  | H                               | 3.154459  | -4.082248 | 0.040178  |
| H                        | -1.679490 | 4.568609  | -0.000871 | H                               | 2.645955  | -3.696733 | -1.626816 |
| C                        | -0.144462 | 5.647077  | 1.091895  | C                               | 1.234076  | -3.080652 | -0.132402 |
| H                        | -0.373836 | 6.603681  | 0.597011  | H                               | 1.170835  | -2.747432 | 0.919064  |
| C                        | 0.881532  | 5.574825  | 2.050710  | H                               | 0.616597  | -3.992061 | -0.253518 |
| H                        | 1.463212  | 6.474586  | 2.305341  | 3c <sup>2+</sup> (acetonitrile) |           |           |           |
| C                        | 1.160708  | 4.351745  | 2.688538  | Ni                              | 2.222558  | -0.793299 | -0.261804 |
| H                        | 1.959074  | 4.289226  | 3.444232  | Fe                              | -0.328092 | 0.006259  | -0.174907 |

|   |           |           |           |                          |           |           |           |
|---|-----------|-----------|-----------|--------------------------|-----------|-----------|-----------|
| S | 0.534721  | -2.212289 | -0.517403 | H                        | 1.357880  | -0.701385 | -3.125546 |
| S | 1.131688  | -0.416326 | 1.642743  | H                        | 2.170691  | -2.091313 | -3.891290 |
| P | -1.148430 | 1.968468  | 0.558429  | C                        | 3.707318  | -2.728863 | -1.653031 |
| P | -2.093609 | -0.921462 | 1.081887  | H                        | 4.487671  | -2.463128 | -0.916078 |
| O | 1.493843  | 1.525747  | -1.898469 | H                        | 2.988542  | -3.369077 | -1.108214 |
| N | 2.984461  | -1.446272 | -2.003744 | C                        | 4.324207  | -3.500469 | -2.819576 |
| N | 3.704863  | 0.399745  | 0.362293  | H                        | 4.785263  | -4.423488 | -2.412046 |
| C | 0.972838  | 0.808408  | -1.118380 | H                        | 3.568305  | -3.811372 | -3.568767 |
| C | -1.924447 | 1.627352  | 2.217879  | H                        | 5.122851  | -2.932159 | -3.336753 |
| H | -1.091041 | 1.380526  | 2.909161  | C                        | 3.887701  | -0.468534 | -2.687348 |
| H | -2.436176 | 2.539840  | 2.586848  | H                        | 4.318547  | -0.959907 | -3.584771 |
| C | -2.894077 | 0.450307  | 2.074784  | H                        | 3.245670  | 0.355741  | -3.050918 |
| H | -3.801702 | 0.764690  | 1.520792  | C                        | 4.999349  | 0.109485  | -1.818234 |
| H | -3.225778 | 0.064414  | 3.058940  | H                        | 5.648104  | 0.712571  | -2.486606 |
| C | -2.537081 | 2.723962  | -0.412320 | H                        | 5.655705  | -0.682941 | -1.403488 |
| C | -3.550216 | 1.895077  | -0.950962 | C                        | 4.488214  | 1.051373  | -0.733444 |
| H | -3.505649 | 0.803308  | -0.842534 | H                        | 3.822026  | 1.808577  | -1.189709 |
| C | -4.640046 | 2.452239  | -1.640652 | H                        | 5.334714  | 1.603665  | -0.273799 |
| H | -5.415985 | 1.786562  | -2.050622 | C                        | 4.567847  | -0.511869 | 1.206919  |
| C | -4.733666 | 3.845354  | -1.808542 | H                        | 4.966996  | -1.285151 | 0.525369  |
| H | -5.583687 | 4.281917  | -2.356712 | H                        | 3.897131  | -1.045248 | 1.907201  |
| C | -3.737494 | 4.677900  | -1.268363 | C                        | 5.708600  | 0.156873  | 1.973222  |
| H | -3.805402 | 5.771227  | -1.385778 | H                        | 6.255513  | -0.631387 | 2.530054  |
| C | -2.648403 | 4.124903  | -0.571714 | H                        | 6.438003  | 0.657971  | 1.305704  |
| H | -1.887740 | 4.797752  | -0.148685 | H                        | 5.343510  | 0.894464  | 2.715939  |
| C | 0.016148  | 3.364382  | 0.828841  | C                        | 3.074073  | 1.500850  | 1.174382  |
| C | 0.625854  | 3.968523  | -0.297234 | H                        | 2.470775  | 2.112872  | 0.478360  |
| H | 0.349893  | 3.650127  | -1.312964 | H                        | 3.863339  | 2.164080  | 1.589782  |
| C | 1.577694  | 4.985791  | -0.128854 | C                        | 2.188276  | 0.958944  | 2.273451  |
| H | 2.045842  | 5.444518  | -1.014029 | H                        | 1.545669  | 1.757967  | 2.688145  |
| C | 1.932487  | 5.414656  | 1.164028  | H                        | 2.764336  | 0.519302  | 3.113072  |
| H | 2.686281  | 6.207018  | 1.296052  | C                        | -1.867653 | -0.136813 | -2.790157 |
| C | 1.311362  | 4.838180  | 2.285347  | N                        | -1.305814 | -0.068064 | -1.765679 |
| H | 1.570963  | 5.179504  | 3.299897  | C                        | -2.636225 | -0.243380 | -4.012006 |
| C | 0.352399  | 3.821764  | 2.122694  | H                        | -3.220086 | -1.187750 | -3.994733 |
| H | -0.122433 | 3.392062  | 3.016805  | H                        | -1.966096 | -0.242503 | -4.895916 |
| C | -3.451925 | -1.721074 | 0.129574  | H                        | -3.337962 | 0.614039  | -4.084213 |
| C | -3.130860 | -2.491339 | -1.011633 | 3c <sup>2+</sup> (water) |           |           |           |
| H | -2.081400 | -2.610628 | -1.316809 | Ni                       | 2.180397  | -0.874325 | -0.216766 |
| C | -4.146180 | -3.106170 | -1.763449 | Fe                       | -0.416041 | 0.056068  | -0.175429 |
| H | -3.880453 | -3.702821 | -2.650316 | S                        | 0.427984  | -2.227782 | -0.548295 |
| C | -5.492801 | -2.953929 | -1.386479 | S                        | 0.981247  | -0.385705 | 1.581048  |
| H | -6.290130 | -3.428488 | -1.980289 | P                        | -1.292220 | 1.985954  | 0.461586  |
| C | -5.818275 | -2.197672 | -0.245606 | P                        | -2.278874 | -0.840338 | 0.891323  |
| H | -6.870233 | -2.082864 | 0.060692  | O                        | 1.378263  | 1.578738  | -1.931987 |
| C | -4.805404 | -1.586057 | 0.513793  | N                        | 2.950452  | -1.496525 | -1.950960 |
| H | -5.082969 | -1.008455 | 1.408757  | N                        | 3.617197  | 0.371910  | 0.410545  |
| C | -1.601668 | -2.195371 | 2.316586  | C                        | 0.812377  | 0.883445  | -1.167662 |
| C | -1.556799 | -3.560262 | 1.952490  | C                        | -2.284491 | 1.717383  | 2.008621  |
| H | -1.901791 | -3.884819 | 0.958954  | H                        | -1.558950 | 1.500368  | 2.820861  |
| C | -1.083379 | -4.519815 | 2.864306  | H                        | -2.838177 | 2.642561  | 2.269531  |
| H | -1.060139 | -5.581631 | 2.571601  | C                        | -3.220142 | 0.527863  | 1.758232  |
| C | -0.647454 | -4.128608 | 4.143538  | H                        | -4.046242 | 0.811744  | 1.073713  |
| H | -0.277516 | -4.882583 | 4.856542  | H                        | -3.668082 | 0.142526  | 2.695294  |
| C | -0.688674 | -2.771006 | 4.509807  | C                        | -2.525485 | 2.499029  | -0.802347 |
| H | -0.351001 | -2.455774 | 5.509996  | C                        | -2.644272 | 1.739084  | -1.985930 |
| C | -1.157328 | -1.806013 | 3.601672  | H                        | -1.966993 | 0.886739  | -2.164999 |
| H | -1.168538 | -0.748242 | 3.905563  | C                        | -3.627418 | 2.062007  | -2.936742 |
| C | 0.773710  | -2.607149 | -2.306564 | H                        | -3.719310 | 1.460566  | -3.854474 |
| H | 1.068871  | -3.675353 | -2.345523 | C                        | -4.489656 | 3.149298  | -2.708546 |
| H | -0.194578 | -2.502420 | -2.836069 | H                        | -5.262359 | 3.403319  | -3.451183 |
| C | 1.811464  | -1.687815 | -2.919676 | C                        | -4.366999 | 3.915789  | -1.532589 |

|   |           |           |           |                          |           |           |           |
|---|-----------|-----------|-----------|--------------------------|-----------|-----------|-----------|
| H | -5.041487 | 4.768666  | -1.357581 | H                        | 6.098244  | -0.564353 | 2.699885  |
| C | -3.388197 | 3.594334  | -0.577793 | H                        | 6.325083  | 0.671355  | 1.428623  |
| H | -3.296219 | 4.193554  | 0.342537  | H                        | 5.179882  | 0.966812  | 2.786735  |
| C | -0.233652 | 3.453301  | 0.735398  | C                        | 2.946957  | 1.498572  | 1.157407  |
| C | 0.316387  | 4.102591  | -0.394460 | H                        | 2.375709  | 2.087302  | 0.415074  |
| H | 0.034600  | 3.778941  | -1.408283 | H                        | 3.715567  | 2.176147  | 1.587765  |
| C | 1.223993  | 5.159529  | -0.225335 | C                        | 2.009201  | 0.995573  | 2.229004  |
| H | 1.651122  | 5.657667  | -1.109708 | H                        | 1.347492  | 1.805461  | 2.590484  |
| C | 1.586628  | 5.579329  | 1.068658  | H                        | 2.536912  | 0.571728  | 3.108288  |
| H | 2.304124  | 6.404544  | 1.199306  | 4a <sup>2+</sup> (water) |           |           |           |
| C | 1.022377  | 4.952189  | 2.193522  | Ni                       | -1.760706 | -1.382297 | 0.540044  |
| H | 1.290427  | 5.287647  | 3.207502  | Fe                       | 0.342295  | 0.023477  | -0.444963 |
| C | 0.111492  | 3.892912  | 2.032539  | S                        | -0.373639 | -0.174930 | 1.847653  |
| H | -0.322090 | 3.414939  | 2.923820  | S                        | 0.154864  | -2.333530 | 0.026630  |
| C | -3.439339 | -1.600429 | -0.300637 | P                        | 0.657736  | 2.205822  | -0.692388 |
| C | -3.054642 | -1.722293 | -1.653340 | P                        | 2.582062  | -0.113803 | 0.054113  |
| H | -2.061011 | -1.370455 | -1.975441 | O                        | 0.840794  | -0.440178 | -3.273177 |
| C | -3.939618 | -2.288695 | -2.586773 | N                        | -3.310212 | -0.296277 | 1.185912  |
| H | -3.636196 | -2.381099 | -3.641174 | N                        | -2.673577 | -2.551775 | -0.807615 |
| C | -5.207026 | -2.734642 | -2.170516 | C                        | 0.673725  | -0.242445 | -2.133642 |
| H | -5.900645 | -3.179338 | -2.901424 | C                        | 2.448404  | 2.428974  | -1.156413 |
| C | -5.591731 | -2.615563 | -0.820585 | H                        | 2.484431  | 2.134213  | -2.226544 |
| H | -6.583830 | -2.966777 | -0.495966 | H                        | 2.724334  | 3.499599  | -1.079378 |
| C | -4.711564 | -2.050676 | 0.116937  | C                        | 3.359501  | 1.550545  | -0.299704 |
| H | -5.009961 | -1.962557 | 1.174010  | H                        | 3.534076  | 2.028271  | 0.683409  |
| C | -1.935742 | -2.119095 | 2.152182  | H                        | 4.351151  | 1.402100  | -0.771281 |
| C | -1.902190 | -3.483323 | 1.785705  | C                        | 0.308928  | 3.248430  | 0.779183  |
| H | -2.187825 | -3.790090 | 0.767528  | C                        | 1.114800  | 3.140846  | 1.937804  |
| C | -1.511358 | -4.452160 | 2.726045  | H                        | 1.977792  | 2.460144  | 1.970256  |
| H | -1.494769 | -5.514901 | 2.437542  | C                        | 0.798505  | 3.884668  | 3.086264  |
| C | -1.145273 | -4.067646 | 4.029293  | H                        | 1.434429  | 3.795922  | 3.980643  |
| H | -0.838902 | -4.829257 | 4.763527  | C                        | -0.332127 | 4.723140  | 3.100654  |
| C | -1.171963 | -2.708662 | 4.393749  | H                        | -0.582384 | 5.296511  | 4.006824  |
| H | -0.886304 | -2.402446 | 5.412382  | C                        | -1.147563 | 4.816009  | 1.959009  |
| C | -1.560011 | -1.733688 | 3.459382  | H                        | -2.040494 | 5.460252  | 1.966068  |
| H | -1.563629 | -0.672984 | 3.754349  | C                        | -0.831078 | 4.084007  | 0.800960  |
| C | 0.740398  | -2.640367 | -2.321702 | H                        | -1.482150 | 4.160104  | -0.083022 |
| H | 1.046566  | -3.706235 | -2.340421 | C                        | -0.243191 | 3.038809  | -2.064358 |
| H | -0.206281 | -2.547689 | -2.890426 | C                        | 0.147994  | 4.348746  | -2.431711 |
| C | 1.795757  | -1.718784 | -2.894590 | H                        | 0.964763  | 4.857815  | -1.896578 |
| H | 1.351970  | -0.725113 | -3.089584 | C                        | -0.517567 | 5.016594  | -3.471688 |
| H | 2.174466  | -2.106643 | -3.865458 | H                        | -0.206808 | 6.035634  | -3.750386 |
| C | 3.658350  | -2.781290 | -1.585982 | C                        | -1.578828 | 4.389345  | -4.151427 |
| H | 4.422920  | -2.518708 | -0.830000 | H                        | -2.099783 | 4.916401  | -4.966076 |
| H | 2.925052  | -3.420283 | -1.058524 | C                        | -1.973963 | 3.091014  | -3.786934 |
| C | 4.296653  | -3.554420 | -2.739322 | H                        | -2.804603 | 2.594579  | -4.312205 |
| H | 4.743593  | -4.480629 | -2.324283 | C                        | -1.309399 | 2.416047  | -2.747450 |
| H | 3.554151  | -3.857935 | -3.504621 | H                        | -1.633533 | 1.399002  | -2.479148 |
| H | 5.108510  | -2.988034 | -3.237332 | C                        | 3.176982  | -0.570590 | 1.740153  |
| C | 3.868499  | -0.521366 | -2.616690 | C                        | 2.551381  | -1.614554 | 2.460665  |
| H | 4.306755  | -1.009601 | -3.512434 | H                        | 1.695883  | -2.154045 | 2.030735  |
| H | 3.232992  | 0.309232  | -2.979152 | C                        | 3.018927  | -1.982594 | 3.733255  |
| C | 4.968186  | 0.047092  | -1.729466 | H                        | 2.518166  | -2.798033 | 4.278129  |
| H | 5.641313  | 0.635687  | -2.386039 | C                        | 4.113200  | -1.312117 | 4.306455  |
| H | 5.602134  | -0.748639 | -1.287244 | H                        | 4.475665  | -1.597158 | 5.306599  |
| C | 4.430489  | 1.004746  | -0.674445 | C                        | 4.746231  | -0.278436 | 3.593694  |
| H | 3.773074  | 1.748467  | -1.164811 | H                        | 5.610711  | 0.246904  | 4.029040  |
| H | 5.261721  | 1.569974  | -0.202940 | C                        | 4.286125  | 0.091007  | 2.318037  |
| C | 4.459919  | -0.502815 | 1.312267  | H                        | 4.813239  | 0.892691  | 1.780887  |
| H | 4.881825  | -1.299026 | 0.670051  | C                        | 3.398610  | -1.323307 | -1.069786 |
| H | 3.772354  | -1.015644 | 2.012368  | C                        | 3.482912  | -2.687955 | -0.710777 |
| C | 5.572390  | 0.198479  | 2.090518  | H                        | 3.176854  | -3.024826 | 0.290729  |



|                          |           |           |           |   |           |           |           |
|--------------------------|-----------|-----------|-----------|---|-----------|-----------|-----------|
| C                        | 3.971872  | -3.629810 | -1.632306 | C | -2.273264 | 3.071541  | -0.450269 |
| H                        | 4.034450  | -4.690229 | -1.341818 | C | -3.459858 | 3.684893  | 0.007264  |
| C                        | 4.384861  | -3.220810 | -2.913161 | H | -3.812380 | 3.535483  | 1.038585  |
| H                        | 4.768671  | -3.960851 | -3.632803 | C | -4.206442 | 4.501465  | -0.860376 |
| C                        | 4.310252  | -1.862302 | -3.270275 | H | -5.135068 | 4.970053  | -0.498618 |
| H                        | 4.635295  | -1.533150 | -4.269736 | C | -3.771095 | 4.721144  | -2.179518 |
| C                        | 3.815493  | -0.915434 | -2.357413 | H | -4.358902 | 5.362915  | -2.854440 |
| H                        | 3.742401  | 0.138644  | -2.666454 | C | -2.584397 | 4.118474  | -2.636000 |
| C                        | -1.618919 | 1.043483  | 2.442535  | H | -2.235773 | 4.288107  | -3.666623 |
| H                        | -1.899881 | 0.708398  | 3.461304  | C | -1.841019 | 3.291764  | -1.778303 |
| H                        | -1.150888 | 2.038993  | 2.538893  | H | -0.916066 | 2.817393  | -2.143937 |
| C                        | -2.790792 | 1.082836  | 1.497814  | C | -0.038325 | 3.177891  | 1.412890  |
| H                        | -3.611357 | 1.713843  | 1.903082  | C | 0.188875  | 4.458251  | 0.858867  |
| H                        | -2.476675 | 1.532750  | 0.533627  | H | -0.387431 | 4.798133  | -0.014821 |
| C                        | -3.765016 | -1.042722 | 2.418092  | C | 1.164852  | 5.304111  | 1.413617  |
| H                        | -2.867939 | -1.225474 | 3.040732  | H | 1.337405  | 6.296443  | 0.968609  |
| H                        | -4.099229 | -2.039880 | 2.074368  | C | 1.916367  | 4.886321  | 2.525812  |
| C                        | -4.857355 | -0.373947 | 3.251507  | H | 2.684279  | 5.549054  | 2.954587  |
| H                        | -5.080508 | -1.030911 | 4.116609  | C | 1.678947  | 3.621487  | 3.093900  |
| H                        | -4.537965 | 0.608527  | 3.653819  | H | 2.257436  | 3.289066  | 3.969801  |
| H                        | -5.801227 | -0.236467 | 2.687166  | C | 0.709169  | 2.768694  | 2.542619  |
| C                        | -4.416531 | -0.109495 | 0.197776  | H | 0.552554  | 1.778536  | 2.994614  |
| H                        | -4.022398 | 0.573897  | -0.581930 | C | -2.028801 | -2.322443 | 1.700091  |
| H                        | -5.250968 | 0.421775  | 0.702431  | C | -2.237849 | -3.647368 | 1.256705  |
| C                        | -4.916095 | -1.381277 | -0.470185 | H | -2.646690 | -3.839326 | 0.252799  |
| H                        | -5.808930 | -1.105826 | -1.068057 | C | -1.909731 | -4.728639 | 2.091424  |
| H                        | -5.267405 | -2.133935 | 0.264837  | H | -2.071905 | -5.758046 | 1.735512  |
| C                        | -3.890529 | -1.951048 | -1.437056 | C | -1.375864 | -4.497935 | 3.371842  |
| H                        | -4.354912 | -2.713883 | -2.096715 | H | -1.116312 | -5.347309 | 4.023059  |
| H                        | -3.526675 | -1.134684 | -2.093071 | C | -1.179514 | -3.179117 | 3.821822  |
| C                        | -2.986845 | -3.816115 | -0.043499 | H | -0.770065 | -2.991735 | 4.826784  |
| H                        | -3.619279 | -3.517970 | 0.814859  | C | -1.501985 | -2.092782 | 2.991812  |
| H                        | -2.036248 | -4.172855 | 0.396478  | H | -1.335083 | -1.067987 | 3.354835  |
| C                        | -3.658072 | -4.937577 | -0.834943 | C | -3.610881 | -1.574332 | -0.590100 |
| H                        | -3.776265 | -5.810226 | -0.160970 | C | -3.278100 | -1.934432 | -1.912617 |
| H                        | -4.667288 | -4.658475 | -1.197580 | H | -2.251819 | -1.796127 | -2.284349 |
| H                        | -3.047806 | -5.265921 | -1.700344 | C | -4.255425 | -2.484027 | -2.761270 |
| C                        | -1.698866 | -2.773184 | -1.936798 | H | -3.985583 | -2.761847 | -3.792077 |
| H                        | -1.566428 | -1.787001 | -2.422722 | C | -5.567586 | -2.676276 | -2.295537 |
| H                        | -2.144119 | -3.457617 | -2.690951 | H | -6.332881 | -3.103700 | -2.962343 |
| C                        | -0.360226 | -3.287669 | -1.460655 | C | -5.901898 | -2.324577 | -0.974178 |
| H                        | 0.414570  | -3.173446 | -2.244896 | H | -6.927420 | -2.477229 | -0.602899 |
| H                        | -0.387110 | -4.352752 | -1.153933 | C | -4.929562 | -1.779938 | -0.119982 |
| H                        | -1.291534 | -0.205447 | -0.693437 | H | -5.201883 | -1.523954 | 0.915669  |
| H                        | -1.044852 | 0.684201  | -0.822812 | C | 2.182385  | 2.338459  | -1.104640 |
| 4b <sup>2+</sup> (water) |           |           |           | H | 2.847097  | 2.677955  | -1.924412 |
| Ni                       | 2.188311  | -0.750229 | -0.947044 | H | 1.539122  | 3.189905  | -0.813013 |
| Fe                       | -0.552873 | 0.110800  | -0.350503 | C | 2.931877  | 1.796166  | 0.086596  |
| S                        | 1.146894  | 0.985573  | -1.801555 | H | 2.218576  | 1.613184  | 0.908867  |
| S                        | 0.306999  | -1.788569 | -1.452608 | H | 3.679047  | 2.526569  | 0.465043  |
| P                        | -1.242197 | 2.013905  | 0.646756  | C | 4.666165  | 0.624453  | -1.263284 |
| P                        | -2.349409 | -0.907456 | 0.572380  | H | 4.150310  | 0.919116  | -2.197427 |
| O                        | 0.972809  | -0.532228 | 2.048217  | H | 5.078188  | -0.380534 | -1.456246 |
| N                        | 3.599774  | 0.476998  | -0.206931 | C | 5.802598  | 1.597628  | -0.952277 |
| N                        | 3.060658  | -2.530491 | -0.531651 | H | 6.506061  | 1.588442  | -1.809612 |
| C                        | 0.437388  | -0.259122 | 1.041341  | H | 5.449440  | 2.640493  | -0.825229 |
| C                        | -2.323581 | 1.476244  | 2.056593  | H | 6.376293  | 1.305488  | -0.049945 |
| H                        | -1.630763 | 1.107365  | 2.840103  | C | 4.124620  | -0.013202 | 1.107980  |
| H                        | -2.868257 | 2.342977  | 2.481850  | H | 4.900106  | 0.697775  | 1.464888  |
| C                        | -3.270254 | 0.372150  | 1.584423  | H | 3.278945  | 0.052563  | 1.817966  |
| H                        | -4.045049 | 0.786172  | 0.905588  | C | 4.675016  | -1.430778 | 1.123769  |
| H                        | -3.778889 | -0.126098 | 2.433402  | H | 5.055058  | -1.609328 | 2.151053  |

|                          |           |           |           |                                |           |           |           |
|--------------------------|-----------|-----------|-----------|--------------------------------|-----------|-----------|-----------|
| H                        | 5.561328  | -1.530207 | 0.464383  | H                              | -3.982560 | -3.015481 | -3.471421 |
| C                        | 3.639852  | -2.519851 | 0.851347  | C                              | -5.497603 | -2.954819 | -1.906021 |
| H                        | 2.787372  | -2.407293 | 1.551697  | H                              | -6.271659 | -3.435375 | -2.524817 |
| H                        | 4.100671  | -3.516269 | 1.034584  | C                              | -5.788499 | -2.579494 | -0.580398 |
| C                        | 4.129623  | -2.836433 | -1.550914 | H                              | -6.788799 | -2.766233 | -0.159147 |
| H                        | 5.033782  | -2.263875 | -1.278761 | C                              | -4.804115 | -1.967475 | 0.212078  |
| H                        | 4.397904  | -3.910789 | -1.440289 | H                              | -5.037037 | -1.688331 | 1.251989  |
| C                        | 3.727490  | -2.510563 | -2.984609 | C                              | -1.886267 | -2.191501 | 2.003307  |
| H                        | 4.551222  | -2.800024 | -3.668042 | C                              | -1.801732 | -3.548568 | 1.617552  |
| H                        | 2.814197  | -3.051710 | -3.303077 | H                              | -2.036712 | -3.846769 | 0.583970  |
| H                        | 3.539194  | -1.424004 | -3.110109 | C                              | -1.428930 | -4.524522 | 2.557338  |
| C                        | 2.038675  | -3.648830 | -0.608059 | H                              | -1.371383 | -5.580854 | 2.251146  |
| H                        | 2.354298  | -4.473600 | 0.066064  | C                              | -1.136489 | -4.154847 | 3.883190  |
| H                        | 2.048292  | -4.049673 | -1.639405 | H                              | -0.846209 | -4.921842 | 4.618348  |
| C                        | 0.641733  | -3.177594 | -0.275738 | C                              | -1.218837 | -2.804349 | 4.269178  |
| H                        | 0.543237  | -2.827874 | 0.768911  | H                              | -0.993415 | -2.510039 | 5.306200  |
| H                        | -0.101319 | -3.979531 | -0.450963 | C                              | -1.585724 | -1.821593 | 3.333888  |
| H                        | -1.244779 | 0.320058  | -1.897831 | H                              | -1.633424 | -0.768362 | 3.650654  |
| H                        | -1.839977 | 0.536524  | -1.368829 | C                              | 0.808374  | -2.592437 | -2.447961 |
| 4c <sup>2+</sup> (water) |           |           |           | H                              | 1.103413  | -3.661272 | -2.464871 |
| Ni                       | 2.123160  | -0.831460 | -0.267773 | H                              | -0.113387 | -2.482048 | -3.053042 |
| Fe                       | -0.406776 | 0.005200  | -0.348411 | C                              | 1.897810  | -1.675755 | -2.964291 |
| S                        | 0.425704  | -2.208773 | -0.679935 | H                              | 1.472707  | -0.680761 | -3.189812 |
| S                        | 0.910628  | -0.475140 | 1.561471  | H                              | 2.326026  | -2.067856 | -3.912312 |
| P                        | -1.240692 | 1.968691  | 0.337690  | C                              | 3.679477  | -2.758051 | -1.571261 |
| P                        | -2.249179 | -0.917382 | 0.735743  | H                              | 4.411084  | -2.512584 | -0.779281 |
| O                        | 1.530388  | 1.554819  | -1.922084 | H                              | 2.916877  | -3.392765 | -1.081945 |
| N                        | 3.000294  | -1.461974 | -1.958165 | C                              | 4.361490  | -3.527495 | -2.701100 |
| N                        | 3.570357  | 0.338153  | 0.477291  | H                              | 4.786655  | -4.457624 | -2.272272 |
| C                        | 0.940216  | 0.825246  | -1.207850 | H                              | 3.651481  | -3.824163 | -3.499127 |
| C                        | -2.188617 | 1.622345  | 1.900177  | H                              | 5.196126  | -2.962074 | -3.161066 |
| H                        | -1.445978 | 1.355796  | 2.680946  | C                              | 3.958297  | -0.484079 | -2.563488 |
| H                        | -2.725562 | 2.540028  | 2.216375  | H                              | 4.447011  | -0.969060 | -3.434288 |
| C                        | -3.147515 | 0.460736  | 1.624965  | H                              | 3.348582  | 0.349652  | -2.959736 |
| H                        | -3.967363 | 0.776215  | 0.946241  | C                              | 5.010350  | 0.076603  | -1.614369 |
| H                        | -3.607383 | 0.072379  | 2.554917  | H                              | 5.700917  | 0.689544  | -2.229362 |
| C                        | -2.512528 | 2.767243  | -0.746627 | H                              | 5.638450  | -0.723572 | -1.172002 |
| C                        | -3.276129 | 2.021566  | -1.671129 | C                              | 4.428435  | 1.003168  | -0.552765 |
| H                        | -3.098238 | 0.944652  | -1.817730 | H                              | 3.795035  | 1.767568  | -1.042046 |
| C                        | -4.294029 | 2.640595  | -2.417630 | H                              | 5.242707  | 1.546107  | -0.028548 |
| H                        | -4.879395 | 2.043858  | -3.134409 | C                              | 4.372772  | -0.589106 | 1.363560  |
| C                        | -4.559612 | 4.010634  | -2.249906 | H                              | 4.825650  | -1.345997 | 0.697582  |
| H                        | -5.353263 | 4.496095  | -2.839273 | H                              | 3.656777  | -1.141298 | 2.001633  |
| C                        | -3.808404 | 4.759196  | -1.325123 | C                              | 5.451556  | 0.065962  | 2.224856  |
| H                        | -4.012725 | 5.832272  | -1.184527 | H                              | 5.960166  | -0.733498 | 2.801016  |
| C                        | -2.792761 | 4.143833  | -0.575205 | H                              | 6.224134  | 0.583543  | 1.622036  |
| H                        | -2.216130 | 4.741046  | 0.148210  | H                              | 5.030616  | 0.785394  | 2.955591  |
| C                        | -0.089005 | 3.343954  | 0.720529  | C                              | 2.891994  | 1.430371  | 1.262961  |
| C                        | 0.571723  | 3.986024  | -0.353746 | H                              | 2.341893  | 2.059273  | 0.538499  |
| H                        | 0.333428  | 3.709845  | -1.391741 | H                              | 3.654489  | 2.080897  | 1.742886  |
| C                        | 1.529629  | 4.979186  | -0.100864 | C                              | 1.934028  | 0.873454  | 2.290695  |
| H                        | 2.043348  | 5.467312  | -0.943607 | H                              | 1.273216  | 1.667170  | 2.685640  |
| C                        | 1.832932  | 5.347422  | 1.223720  | H                              | 2.451141  | 0.406548  | 3.153630  |
| H                        | 2.592244  | 6.120174  | 1.421309  | H                              | -0.788946 | -0.064638 | -1.880841 |
| C                        | 1.152122  | 4.739422  | 2.292216  | H                              | -1.547628 | 0.063185  | -1.441300 |
| H                        | 1.368269  | 5.038273  | 3.329687  | TS-2a2b <sup>+</sup> (acetone) |           |           |           |
| C                        | 0.188122  | 3.745107  | 2.045787  | Ni                             | 2.168904  | -0.509960 | -0.864956 |
| H                        | -0.336934 | 3.288296  | 2.897478  | Fe                             | -0.277608 | -0.016342 | 0.056246  |
| C                        | -3.519932 | -1.716072 | -0.324496 | S                              | 0.580347  | 0.315195  | -2.166181 |
| C                        | -3.229642 | -2.100208 | -1.650580 | S                              | 0.639185  | -2.108538 | -0.677859 |
| H                        | -2.231909 | -1.922955 | -2.077103 | P                              | -1.414754 | 1.623258  | 0.950090  |
| C                        | -4.217893 | -2.718830 | -2.437407 | P                              | -2.142233 | -1.155130 | 0.431282  |

|   |           |           |           |                                |           |           |           |
|---|-----------|-----------|-----------|--------------------------------|-----------|-----------|-----------|
| O | 1.667405  | 0.734068  | 2.128334  | H                              | 3.221804  | 0.552251  | -3.251943 |
| N | 3.281387  | 1.125161  | -1.215554 | C                              | 4.798334  | 2.047136  | -3.091489 |
| N | 3.460876  | -1.592348 | 0.220013  | H                              | 5.244549  | 1.724883  | -4.054924 |
| C | 0.982590  | 0.391935  | 1.216602  | H                              | 4.169781  | 2.936771  | -3.299763 |
| C | -2.556032 | 0.927683  | 2.253738  | H                              | 5.631916  | 2.353357  | -2.427581 |
| H | -1.918417 | 0.541311  | 3.074996  | C                              | 4.237336  | 1.449707  | -0.114430 |
| H | -3.223049 | 1.718824  | 2.655225  | H                              | 4.827600  | 2.344710  | -0.406767 |
| C | -3.328386 | -0.199782 | 1.558804  | H                              | 3.618944  | 1.740800  | 0.758006  |
| H | -4.126809 | 0.213709  | 0.907314  | C                              | 5.164330  | 0.309697  | 0.291647  |
| H | -3.800176 | -0.893776 | 2.282540  | H                              | 5.911490  | 0.731260  | 0.995919  |
| C | -2.655354 | 2.504613  | -0.124945 | H                              | 5.750559  | -0.076931 | -0.567590 |
| C | -2.981925 | 2.026555  | -1.409936 | C                              | 4.433125  | -0.800806 | 1.035283  |
| H | -2.457137 | 1.145527  | -1.814068 | H                              | 3.847517  | -0.348389 | 1.858333  |
| C | -3.976926 | 2.661461  | -2.175750 | H                              | 5.160270  | -1.501020 | 1.499128  |
| H | -4.222833 | 2.274549  | -3.177568 | C                              | 4.153031  | -2.453357 | -0.810169 |
| C | -4.653438 | 3.780827  | -1.660766 | H                              | 4.660541  | -1.762884 | -1.510096 |
| H | -5.432465 | 4.280133  | -2.259021 | H                              | 3.359885  | -2.950192 | -1.401011 |
| C | -4.332522 | 4.263780  | -0.376905 | C                              | 5.146664  | -3.490734 | -0.282967 |
| H | -4.857610 | 5.142743  | 0.030389  | H                              | 5.553774  | -4.050461 | -1.150226 |
| C | -3.341077 | 3.629229  | 0.389531  | H                              | 6.006140  | -3.032547 | 0.246945  |
| H | -3.095084 | 4.017362  | 1.391439  | H                              | 4.670582  | -4.230416 | 0.392430  |
| C | -0.508199 | 3.035861  | 1.700152  | C                              | 2.655434  | -2.408921 | 1.196847  |
| C | 0.064222  | 3.996045  | 0.834851  | H                              | 2.224212  | -1.694821 | 1.921545  |
| H | -0.105682 | 3.927746  | -0.252108 | H                              | 3.327316  | -3.091755 | 1.762709  |
| C | 0.846206  | 5.039743  | 1.354892  | C                              | 1.540051  | -3.178646 | 0.532083  |
| H | 1.288672  | 5.783078  | 0.672534  | H                              | 0.822757  | -3.552666 | 1.287893  |
| C | 1.060037  | 5.135865  | 2.743637  | H                              | 1.902868  | -4.050099 | -0.051041 |
| H | 1.673496  | 5.954736  | 3.152403  | H                              | -0.796547 | 1.016447  | -0.877058 |
| C | 0.485124  | 4.186592  | 3.607735  | TS-2a2c <sup>+</sup> (acetone) |           |           |           |
| H | 0.645536  | 4.260679  | 4.695349  | Ni                             | -2.555342 | -0.289476 | -0.082452 |
| C | -0.294848 | 3.135870  | 3.090558  | Fe                             | 0.199128  | 0.122384  | -0.105084 |
| H | -0.728001 | 2.394669  | 3.779398  | S                              | -1.162960 | -1.462572 | -1.309706 |
| C | -3.246720 | -1.748046 | -0.928946 | S                              | -1.539552 | 1.283829  | -1.220162 |
| C | -2.795095 | -1.612124 | -2.257994 | P                              | 1.615063  | 1.717384  | -0.594227 |
| H | -1.797685 | -1.179876 | -2.442323 | P                              | 2.023494  | -1.160301 | -0.574098 |
| C | -3.613887 | -2.008971 | -3.330821 | O                              | -0.206873 | 0.972997  | 2.659852  |
| H | -3.252955 | -1.898941 | -4.366145 | N                              | -3.156295 | -1.958997 | 0.848005  |
| C | -4.892729 | -2.538880 | -3.079843 | N                              | -3.704570 | 1.075841  | 0.833908  |
| H | -5.537945 | -2.844866 | -3.919156 | C                              | -0.070531 | 0.554661  | 1.542981  |
| C | -5.349221 | -2.677653 | -1.754394 | C                              | 2.754662  | 1.151031  | -1.965700 |
| H | -6.350662 | -3.092921 | -1.556156 | H                              | 2.128745  | 0.977241  | -2.865048 |
| C | -4.529460 | -2.288021 | -0.681105 | H                              | 3.520335  | 1.919810  | -2.199979 |
| H | -4.889012 | -2.409742 | 0.353638  | C                              | 3.370540  | -0.149315 | -1.445587 |
| C | -1.812232 | -2.689904 | 1.416624  | H                              | 4.159376  | 0.072593  | -0.698030 |
| C | -2.014620 | -3.988525 | 0.903559  | H                              | 3.820741  | -0.763770 | -2.249752 |
| H | -2.449948 | -4.126167 | -0.098522 | C                              | 2.901406  | 2.136466  | 0.688538  |
| C | -1.653350 | -5.116308 | 1.666226  | C                              | 3.053077  | 1.347547  | 1.846211  |
| H | -1.809874 | -6.125305 | 1.251591  | H                              | 2.344913  | 0.531025  | 2.045039  |
| C | -1.096847 | -4.958906 | 2.947726  | C                              | 4.110122  | 1.588194  | 2.743303  |
| H | -0.816818 | -5.842996 | 3.542599  | H                              | 4.216652  | 0.956324  | 3.639594  |
| C | -0.887253 | -3.663881 | 3.462418  | C                              | 5.024944  | 2.624983  | 2.491967  |
| H | -0.439393 | -3.530481 | 4.460376  | H                              | 5.853298  | 2.815295  | 3.193351  |
| C | -1.229943 | -2.536909 | 2.696980  | C                              | 4.880394  | 3.420423  | 1.338102  |
| H | -1.018332 | -1.527671 | 3.086385  | H                              | 5.594110  | 4.235175  | 1.135099  |
| C | 1.238259  | 2.040798  | -2.338457 | C                              | 3.829147  | 3.175816  | 0.439284  |
| H | 1.618297  | 2.139095  | -3.375375 | H                              | 3.730002  | 3.801017  | -0.463097 |
| H | 0.404067  | 2.759193  | -2.207714 | C                              | 0.998244  | 3.375084  | -1.101361 |
| C | 2.303219  | 2.265395  | -1.288426 | C                              | 0.822111  | 4.398116  | -0.141254 |
| H | 1.819207  | 2.316816  | -0.293642 | H                              | 1.138221  | 4.236300  | 0.901544  |
| H | 2.840063  | 3.225494  | -1.455478 | C                              | 0.239805  | 5.624050  | -0.509304 |
| C | 3.988456  | 0.880015  | -2.524511 | H                              | 0.111759  | 6.415408  | 0.246485  |
| H | 4.642172  | 0.001301  | -2.369495 | C                              | -0.187069 | 5.833876  | -1.833575 |

|   |           |           |           |                                |           |           |           |
|---|-----------|-----------|-----------|--------------------------------|-----------|-----------|-----------|
| H | -0.648926 | 6.792182  | -2.120364 | H                              | -0.100334 | -0.734816 | 1.231672  |
| C | -0.023951 | 4.814974  | -2.790697 | TS-2b2c <sup>+</sup> (acetone) |           |           |           |
| H | -0.357228 | 4.973386  | -3.828910 | Ni                             | -2.076460 | -1.281298 | -0.113831 |
| C | 0.564876  | 3.590477  | -2.429508 | Fe                             | 0.337938  | 0.140340  | 0.321656  |
| H | 0.677712  | 2.799048  | -3.186838 | S                              | -1.280246 | -0.672564 | 1.849896  |
| C | 2.885991  | -1.948035 | 0.862390  | S                              | -0.022151 | -2.030096 | -0.402528 |
| C | 2.131382  | -2.329965 | 1.991892  | P                              | 1.121345  | 2.172598  | 0.364755  |
| H | 1.046217  | -2.138952 | 2.011371  | P                              | 2.463901  | -0.466614 | 0.659100  |
| C | 2.753785  | -2.939238 | 3.095209  | O                              | -1.162905 | 1.313112  | -1.918088 |
| H | 2.151304  | -3.228767 | 3.971130  | N                              | -3.687858 | -0.101449 | 0.195698  |
| C | 4.141508  | -3.169110 | 3.082284  | N                              | -2.687965 | -2.268883 | -1.768642 |
| H | 4.633277  | -3.636632 | 3.950376  | C                              | -0.646543 | 0.778054  | -0.990438 |
| C | 4.899107  | -2.802927 | 1.954379  | C                              | 2.672426  | 2.214680  | 1.401854  |
| H | 5.985287  | -2.987178 | 1.934267  | H                              | 3.172097  | 3.198690  | 1.293630  |
| C | 4.276042  | -2.202596 | 0.846237  | H                              | 2.378336  | 2.079261  | 2.462508  |
| H | 4.884756  | -1.939707 | -0.032796 | C                              | 3.546828  | 1.053184  | 0.918915  |
| C | 1.840869  | -2.586549 | -1.742854 | H                              | 4.361475  | 0.816238  | 1.632532  |
| C | 2.030344  | -3.929897 | -1.354736 | H                              | 4.014433  | 1.303227  | -0.055448 |
| H | 2.338527  | -4.171612 | -0.325483 | C                              | -0.063037 | 3.390001  | 1.075091  |
| C | 1.827881  | -4.969444 | -2.282453 | C                              | -0.177384 | 3.549955  | 2.474309  |
| H | 1.979071  | -6.014968 | -1.968788 | H                              | 0.518391  | 3.035816  | 3.155989  |
| C | 1.438847  | -4.676680 | -3.601470 | C                              | -1.198625 | 4.351793  | 3.013523  |
| H | 1.281731  | -5.492000 | -4.325773 | H                              | -1.275818 | 4.472643  | 4.105927  |
| C | 1.250617  | -3.337166 | -3.994165 | C                              | -2.122707 | 4.989031  | 2.164843  |
| H | 0.945321  | -3.100293 | -5.026096 | H                              | -2.927285 | 5.609910  | 2.590236  |
| C | 1.440279  | -2.298186 | -3.068782 | C                              | -2.013560 | 4.831664  | 0.770522  |
| H | 1.273143  | -1.252310 | -3.375316 | H                              | -2.732694 | 5.327802  | 0.099225  |
| C | -1.287749 | -3.069933 | -0.404313 | C                              | -0.987859 | 4.040386  | 0.225900  |
| H | -1.859941 | -3.762004 | -1.054856 | H                              | -0.914350 | 3.918895  | -0.866098 |
| H | -0.272939 | -3.494180 | -0.271889 | C                              | 1.703270  | 2.974508  | -1.202888 |
| C | -1.943546 | -2.842800 | 0.937968  | C                              | 2.084058  | 4.335878  | -1.215043 |
| H | -1.232334 | -2.313241 | 1.604039  | H                              | 1.961164  | 4.954363  | -0.310665 |
| H | -2.204852 | -3.807361 | 1.427097  | C                              | 2.616620  | 4.907588  | -2.383062 |
| C | -4.230965 | -2.539955 | -0.037336 | H                              | 2.910835  | 5.969488  | -2.386911 |
| H | -5.049353 | -1.795927 | -0.067942 | C                              | 2.774658  | 4.126201  | -3.544494 |
| H | -3.819008 | -2.575433 | -1.063959 | H                              | 3.194248  | 4.576938  | -4.458308 |
| C | -4.779138 | -3.912211 | 0.359364  | C                              | 2.394449  | 2.772217  | -3.536611 |
| H | -5.536739 | -4.213393 | -0.393304 | H                              | 2.514807  | 2.156082  | -4.442104 |
| H | -3.993821 | -4.695262 | 0.368133  | C                              | 1.857952  | 2.199383  | -2.369381 |
| H | -5.281423 | -3.906602 | 1.347802  | H                              | 1.556458  | 1.140047  | -2.352605 |
| C | -3.632140 | -1.750108 | 2.248656  | C                              | 3.237014  | -1.379047 | -0.756239 |
| H | -3.996868 | -2.718956 | 2.652913  | C                              | 3.168890  | -2.792966 | -0.792072 |
| H | -2.736250 | -1.470434 | 2.839823  | H                              | 2.794475  | -3.350245 | 0.080386  |
| C | -4.688667 | -0.666426 | 2.417316  | C                              | 3.574679  | -3.498139 | -1.938632 |
| H | -5.061380 | -0.729177 | 3.460844  | H                              | 3.511273  | -4.598244 | -1.950332 |
| H | -5.573582 | -0.845328 | 1.772131  | C                              | 4.062067  | -2.805866 | -3.062544 |
| C | -4.113237 | 0.730824  | 2.229659  | H                              | 4.378896  | -3.359599 | -3.960875 |
| H | -3.198026 | 0.822696  | 2.848661  | C                              | 4.149339  | -1.401750 | -3.028208 |
| H | -4.828338 | 1.499453  | 2.593953  | H                              | 4.539132  | -0.848631 | -3.897968 |
| C | -4.892766 | 1.227023  | -0.084384 | C                              | 3.736672  | -0.693419 | -1.886184 |
| H | -5.400146 | 0.243963  | -0.109445 | H                              | 3.800661  | 0.405099  | -1.890983 |
| H | -4.493948 | 1.386791  | -1.104873 | C                              | 2.906605  | -1.555241 | 2.094999  |
| C | -5.897134 | 2.327284  | 0.266170  | C                              | 1.905125  | -1.948117 | 3.004348  |
| H | -6.707222 | 2.310848  | -0.491932 | H                              | 0.868073  | -1.613735 | 2.841649  |
| H | -6.370519 | 2.177504  | 1.257587  | C                              | 2.227180  | -2.759657 | 4.108962  |
| H | -5.443645 | 3.338979  | 0.242211  | H                              | 1.435626  | -3.064090 | 4.812677  |
| C | -2.892167 | 2.338512  | 0.935165  | C                              | 3.553170  | -3.180762 | 4.310627  |
| H | -2.078653 | 2.124837  | 1.651500  | H                              | 3.806588  | -3.815897 | 5.174798  |
| H | -3.512462 | 3.155774  | 1.366507  | C                              | 4.559212  | -2.791349 | 3.403699  |
| C | -2.291872 | 2.751826  | -0.387040 | H                              | 5.599479  | -3.121149 | 3.557463  |
| H | -1.513481 | 3.523528  | -0.233700 | C                              | 4.238806  | -1.985624 | 2.298824  |
| H | -3.038251 | 3.160450  | -1.098887 | H                              | 5.028064  | -1.696631 | 1.585188  |

|                               |           |           |           |   |           |           |           |
|-------------------------------|-----------|-----------|-----------|---|-----------|-----------|-----------|
| C                             | -2.487859 | 0.667962  | 2.261394  | C | -1.329215 | 3.662522  | 1.055411  |
| H                             | -3.169177 | 0.264449  | 3.038237  | H | -1.742366 | 3.635676  | 0.034667  |
| H                             | -1.943354 | 1.533403  | 2.687888  | C | 0.533396  | 3.329563  | -1.462707 |
| C                             | -3.205641 | 1.080881  | 0.996740  | C | 0.908858  | 4.686962  | -1.318281 |
| H                             | -2.494000 | 1.630757  | 0.353235  | H | 1.319103  | 5.051182  | -0.362859 |
| H                             | -4.054368 | 1.766158  | 1.213679  | C | 0.753607  | 5.579886  | -2.390134 |
| C                             | -4.699175 | -0.916904 | 0.957697  | H | 1.050783  | 6.633422  | -2.268787 |
| H                             | -4.162883 | -1.368512 | 1.814553  | C | 0.217604  | 5.131009  | -3.612332 |
| H                             | -4.988344 | -1.761160 | 0.306834  | H | 0.093904  | 5.833817  | -4.451287 |
| C                             | -5.950145 | -0.180616 | 1.440850  | C | -0.162763 | 3.785973  | -3.757264 |
| H                             | -6.605463 | -0.911505 | 1.958146  | H | -0.587729 | 3.428752  | -4.708329 |
| H                             | -5.716716 | 0.624449  | 2.166675  | C | -0.006559 | 2.886576  | -2.686835 |
| H                             | -6.537680 | 0.256968  | 0.608180  | H | -0.320107 | 1.841998  | -2.811378 |
| C                             | -4.226803 | 0.453830  | -1.085100 | C | 2.755996  | -1.483660 | 2.026145  |
| H                             | -5.122879 | 1.071713  | -0.858454 | C | 1.970228  | -2.643719 | 2.198247  |
| H                             | -3.450753 | 1.141919  | -1.470567 | H | 1.165405  | -2.879494 | 1.488076  |
| C                             | -4.562800 | -0.565051 | -2.166517 | C | 2.213354  | -3.513102 | 3.274768  |
| H                             | -4.991959 | 0.006470  | -3.016309 | H | 1.590226  | -4.413077 | 3.394977  |
| H                             | -5.371656 | -1.252222 | -1.842672 | C | 3.240750  | -3.232828 | 4.192367  |
| C                             | -3.362753 | -1.330288 | -2.723795 | H | 3.427434  | -3.911888 | 5.039074  |
| H                             | -2.589930 | -0.609506 | -3.059468 | C | 4.031975  | -2.082626 | 4.022402  |
| H                             | -3.686093 | -1.918209 | -3.612893 | H | 4.844132  | -1.858300 | 4.731576  |
| C                             | -3.624819 | -3.382574 | -1.379626 | C | 3.796956  | -1.210462 | 2.945640  |
| H                             | -4.612019 | -2.934633 | -1.169395 | H | 4.442084  | -0.327051 | 2.831578  |
| H                             | -3.760406 | -4.037582 | -2.270445 | C | 3.675744  | -1.026747 | -0.681447 |
| C                             | -3.170811 | -4.188215 | -0.167395 | C | 3.503000  | -2.364894 | -1.105619 |
| H                             | -3.892094 | -5.011615 | 0.014065  | H | 2.748801  | -3.009035 | -0.626483 |
| H                             | -2.167728 | -4.638792 | -0.306477 | C | 4.289095  | -2.881100 | -2.147142 |
| H                             | -3.129987 | -3.551466 | 0.740619  | H | 4.149337  | -3.925060 | -2.468551 |
| C                             | -1.500914 | -2.893438 | -2.480373 | C | 5.248487  | -2.066727 | -2.778490 |
| H                             | -1.734106 | -2.981661 | -3.564034 | H | 5.861981  | -2.471211 | -3.598775 |
| H                             | -1.373863 | -3.920999 | -2.088783 | C | 5.420458  | -0.735672 | -2.360120 |
| C                             | -0.221561 | -2.120110 | -2.243521 | H | 6.169605  | -0.093805 | -2.849656 |
| H                             | -0.249383 | -1.096279 | -2.661854 | C | 4.636674  | -0.211247 | -1.316602 |
| H                             | 0.658213  | -2.650149 | -2.664288 | H | 4.780547  | 0.837009  | -1.015675 |
| H                             | 0.524281  | 0.731059  | 1.701572  | C | -1.920340 | 0.522379  | 2.478331  |
| TS-HD-a <sup>2+</sup> (water) |           |           |           | H | -2.270591 | -0.015042 | 3.382399  |
| Ni                            | -1.973296 | -1.304154 | -0.014289 | H | -1.412141 | 1.444832  | 2.812417  |
| Fe                            | 0.494950  | -0.021136 | -0.282616 | C | -3.037505 | 0.834082  | 1.510804  |
| S                             | -0.705927 | -0.617547 | 1.681128  | H | -3.874564 | 1.350787  | 2.029508  |
| S                             | -0.075640 | -2.257895 | -0.566310 | H | -2.666162 | 1.518043  | 0.726595  |
| P                             | 0.811309  | 2.202125  | -0.025473 | C | -4.082940 | -1.445461 | 1.729057  |
| P                             | 2.517504  | -0.356506 | 0.582481  | H | -3.231034 | -1.811719 | 2.334767  |
| O                             | 1.669714  | 0.072483  | -2.943660 | H | -4.391257 | -2.297931 | 1.093732  |
| N                             | -3.548092 | -0.384938 | 0.792848  | C | -5.228785 | -1.019565 | 2.646127  |
| N                             | -2.762897 | -1.986758 | -1.719800 | H | -5.505104 | -1.887537 | 3.278567  |
| C                             | 1.192944  | 0.063422  | -1.873318 | H | -4.938086 | -0.192119 | 3.324189  |
| C                             | 2.636093  | 2.423523  | 0.300627  | H | -6.134338 | -0.715817 | 2.084041  |
| H                             | 3.096054  | 2.432444  | -0.709836 | C | -4.592524 | 0.094733  | -0.164904 |
| H                             | 2.816244  | 3.410741  | 0.771490  | H | -4.173110 | 0.989441  | -0.663844 |
| C                             | 3.192119  | 1.280248  | 1.150145  | H | -5.472207 | 0.436055  | 0.420374  |
| H                             | 2.862466  | 1.367068  | 2.205365  | C | -5.018333 | -0.910395 | -1.225831 |
| H                             | 4.300435  | 1.262530  | 1.144948  | H | -5.864893 | -0.456414 | -1.780552 |
| C                             | -0.067760 | 3.084654  | 1.325913  | H | -5.419463 | -1.842426 | -0.777438 |
| C                             | 0.457132  | 3.139816  | 2.636674  | C | -3.919376 | -1.194740 | -2.241399 |
| H                             | 1.432825  | 2.691726  | 2.873960  | H | -4.335875 | -1.723305 | -3.124793 |
| C                             | -0.275177 | 3.764460  | 3.661587  | H | -3.506189 | -0.234317 | -2.609346 |
| H                             | 0.143013  | 3.805776  | 4.679317  | C | -3.163706 | -3.411981 | -1.407338 |
| C                             | -1.537403 | 4.324548  | 3.391552  | H | -3.961223 | -3.350618 | -0.642758 |
| H                             | -2.112049 | 4.804678  | 4.198890  | H | -2.304734 | -3.897811 | -0.905357 |
| C                             | -2.061495 | 4.273513  | 2.086626  | C | -3.625067 | -4.258247 | -2.593013 |
| H                             | -3.046484 | 4.713978  | 1.867068  | H | -3.891239 | -5.265620 | -2.213452 |

|                               |           |           |           |                               |           |           |           |
|-------------------------------|-----------|-----------|-----------|-------------------------------|-----------|-----------|-----------|
| H                             | -4.523825 | -3.842135 | -3.090232 | H                             | -2.192609 | -2.003250 | -2.134750 |
| H                             | -2.828522 | -4.388613 | -3.352844 | C                             | -4.219076 | -2.579070 | -2.663784 |
| C                             | -1.670503 | -1.901439 | -2.755510 | H                             | -3.919060 | -2.985454 | -3.642263 |
| H                             | -1.433005 | -0.825776 | -2.873547 | C                             | -5.566310 | -2.614809 | -2.263277 |
| H                             | -2.048036 | -2.272310 | -3.733442 | H                             | -6.329342 | -3.047055 | -2.929543 |
| C                             | -0.421984 | -2.651557 | -2.338662 | C                             | -5.937465 | -2.100732 | -1.007162 |
| H                             | 0.447795  | -2.359552 | -2.958844 | H                             | -6.989895 | -2.132691 | -0.684418 |
| H                             | -0.534066 | -3.752445 | -2.395416 | C                             | -4.968559 | -1.547827 | -0.153219 |
| H                             | -2.036056 | 0.954149  | -1.647543 | H                             | -5.275868 | -1.168920 | 0.833303  |
| H                             | -1.720265 | 1.256757  | -1.005583 | C                             | 2.217212  | 2.317155  | -1.088766 |
| TS-HD-b <sup>2+</sup> (water) |           |           |           | H                             | 2.883975  | 2.646006  | -1.910845 |
| Ni                            | 2.170551  | -0.775367 | -0.947770 | H                             | 1.592631  | 3.179012  | -0.786876 |
| Fe                            | -0.503582 | 0.118469  | -0.322449 | C                             | 2.961311  | 1.752045  | 0.097079  |
| S                             | 1.149733  | 0.982709  | -1.775427 | H                             | 2.246512  | 1.579809  | 0.919878  |
| S                             | 0.274454  | -1.758374 | -1.478221 | H                             | 3.723629  | 2.466506  | 0.475142  |
| P                             | -1.188230 | 2.036312  | 0.665488  | C                             | 4.672608  | 0.551252  | -1.256369 |
| P                             | -2.341242 | -0.847554 | 0.601491  | H                             | 4.161668  | 0.844488  | -2.193861 |
| O                             | 0.976468  | -0.538666 | 2.057793  | H                             | 5.075391  | -0.459330 | -1.439975 |
| N                             | 3.602944  | 0.421197  | -0.201522 | C                             | 5.817842  | 1.515379  | -0.949587 |
| N                             | 2.995776  | -2.578919 | -0.548671 | H                             | 6.528701  | 1.484923  | -1.800271 |
| C                             | 0.437778  | -0.263941 | 1.047408  | H                             | 5.475915  | 2.564059  | -0.841299 |
| C                             | -2.269618 | 1.534786  | 2.086885  | H                             | 6.379728  | 1.229774  | -0.037774 |
| H                             | -1.577349 | 1.168622  | 2.872111  | C                             | 4.115914  | -0.089392 | 1.110535  |
| H                             | -2.797924 | 2.418143  | 2.498999  | H                             | 4.912273  | 0.597503  | 1.468794  |
| C                             | -3.233040 | 0.436622  | 1.634353  | H                             | 3.273690  | -0.003565 | 1.822073  |
| H                             | -4.021671 | 0.856771  | 0.976704  | C                             | 4.626524  | -1.522346 | 1.119198  |
| H                             | -3.725350 | -0.061034 | 2.493110  | H                             | 4.998206  | -1.716000 | 2.146843  |
| C                             | -2.227376 | 3.042258  | -0.470739 | H                             | 5.512641  | -1.641686 | 0.463008  |
| C                             | -3.483576 | 3.555538  | -0.079650 | C                             | 3.565407  | -2.584882 | 0.838307  |
| H                             | -3.882857 | 3.368894  | 0.928392  | H                             | 2.710971  | -2.452386 | 1.532658  |
| C                             | -4.241730 | 4.319295  | -0.985018 | H                             | 4.000709  | -3.592452 | 1.022694  |
| H                             | -5.223682 | 4.709602  | -0.674838 | C                             | 4.064205  | -2.898741 | -1.564323 |
| C                             | -3.750534 | 4.584981  | -2.275492 | H                             | 4.978806  | -2.348561 | -1.281678 |
| H                             | -4.348172 | 5.183645  | -2.980728 | H                             | 4.308591  | -3.979560 | -1.462516 |
| C                             | -2.494909 | 4.082431  | -2.665178 | C                             | 3.677314  | -2.549146 | -2.996628 |
| H                             | -2.102815 | 4.287701  | -3.673474 | H                             | 4.502133  | -2.841025 | -3.677610 |
| C                             | -1.740011 | 3.308211  | -1.770742 | H                             | 2.758861  | -3.072576 | -3.329261 |
| H                             | -0.765474 | 2.903589  | -2.086433 | H                             | 3.506048  | -1.458253 | -3.109467 |
| C                             | 0.012795  | 3.217506  | 1.404193  | C                             | 1.950359  | -3.675725 | -0.641591 |
| C                             | 0.215690  | 4.502708  | 0.852741  | H                             | 2.240350  | -4.507995 | 0.034615  |
| H                             | -0.379601 | 4.840406  | -0.008868 | H                             | 1.965111  | -4.073978 | -1.673707 |
| C                             | 1.192026  | 5.356061  | 1.395223  | C                             | 0.558427  | -3.178276 | -0.325655 |
| H                             | 1.345874  | 6.352886  | 0.953357  | H                             | 0.452363  | -2.836699 | 0.720631  |
| C                             | 1.967747  | 4.940038  | 2.491477  | H                             | -0.202076 | -3.958453 | -0.523373 |
| H                             | 2.736038  | 5.608792  | 2.910119  | H                             | -2.164115 | 0.533619  | -2.032096 |
| C                             | 1.754813  | 3.669383  | 3.056505  | H                             | -1.449595 | 0.396767  | -2.322075 |
| H                             | 2.353436  | 3.338415  | 3.919328  | TS-HD-c <sup>2+</sup> (water) |           |           |           |
| C                             | 0.784181  | 2.809350  | 2.518175  | Ni                            | 2.297709  | -0.754410 | -0.218167 |
| H                             | 0.645068  | 1.813839  | 2.965170  | Fe                            | -0.462087 | 0.026774  | -0.379257 |
| C                             | -2.047155 | -2.269257 | 1.732605  | S                             | 0.694350  | -2.239059 | -0.649805 |
| C                             | -2.294510 | -3.592654 | 1.305387  | S                             | 0.940572  | -0.342512 | 1.485823  |
| H                             | -2.718639 | -3.785175 | 0.308132  | P                             | -1.462348 | 1.906597  | 0.317699  |
| C                             | -1.987990 | -4.673695 | 2.148828  | P                             | -2.226585 | -1.052579 | 0.765447  |
| H                             | -2.181146 | -5.701919 | 1.805088  | O                             | 1.407569  | 1.620698  | -1.996087 |
| C                             | -1.438288 | -4.444794 | 3.422833  | N                             | 3.228621  | -1.320276 | -1.898519 |
| H                             | -1.196201 | -5.294087 | 4.080849  | N                             | 3.585555  | 0.607635  | 0.487885  |
| C                             | -1.204278 | -3.127116 | 3.857429  | C                             | 0.789930  | 0.924916  | -1.278046 |
| H                             | -0.782069 | -2.939778 | 4.857142  | C                             | -2.313419 | 1.493350  | 1.922593  |
| C                             | -1.504812 | -2.041398 | 3.018429  | H                             | -1.516437 | 1.301678  | 2.671813  |
| H                             | -1.307224 | -1.018121 | 3.370151  | H                             | -2.910879 | 2.366025  | 2.256995  |
| C                             | -3.614685 | -1.497411 | -0.559970 | C                             | -3.185967 | 0.253000  | 1.702700  |
| C                             | -3.245993 | -2.022300 | -1.816502 | H                             | -4.065842 | 0.502969  | 1.074573  |

|   |           |           |           |                                      |           |           |           |
|---|-----------|-----------|-----------|--------------------------------------|-----------|-----------|-----------|
| H | -3.562034 | -0.162639 | 2.658174  | H                                    | 5.748230  | 1.037947  | -2.180058 |
| C | -2.833279 | 2.586154  | -0.727065 | H                                    | 5.761812  | -0.339934 | -1.073342 |
| C | -3.645034 | 1.729139  | -1.504618 | C                                    | 4.402161  | 1.305915  | -0.552837 |
| H | -3.451186 | 0.645230  | -1.540166 | H                                    | 3.708971  | 1.982350  | -1.089273 |
| C | -4.730070 | 2.244247  | -2.234130 | H                                    | 5.147906  | 1.948624  | -0.039242 |
| H | -5.352970 | 1.561918  | -2.833228 | C                                    | 4.443335  | -0.199855 | 1.436009  |
| C | -5.015385 | 3.620501  | -2.198061 | H                                    | 4.948169  | -0.970840 | 0.824998  |
| H | -5.861730 | 4.024812  | -2.775263 | H                                    | 3.760235  | -0.751445 | 2.110497  |
| C | -4.216950 | 4.478675  | -1.420304 | C                                    | 5.470443  | 0.581284  | 2.254735  |
| H | -4.436581 | 5.557282  | -1.383001 | H                                    | 6.012213  | -0.138573 | 2.901344  |
| C | -3.133922 | 3.967694  | -0.685132 | H                                    | 6.223596  | 1.090345  | 1.620849  |
| H | -2.522790 | 4.651904  | -0.076741 | H                                    | 4.997918  | 1.333233  | 2.918180  |
| C | -0.397715 | 3.363402  | 0.651697  | C                                    | 2.791515  | 1.673950  | 1.199207  |
| C | 0.226173  | 4.004372  | -0.444818 | H                                    | 2.221353  | 2.223671  | 0.427466  |
| H | 0.006668  | 3.678246  | -1.472355 | H                                    | 3.480721  | 2.403659  | 1.676174  |
| C | 1.122566  | 5.061501  | -0.228672 | C                                    | 1.838319  | 1.088686  | 2.212906  |
| H | 1.607487  | 5.548691  | -1.088846 | H                                    | 1.109624  | 1.844549  | 2.559740  |
| C | 1.402717  | 5.493284  | 1.081706  | H                                    | 2.351175  | 0.680895  | 3.108266  |
| H | 2.115402  | 6.315564  | 1.251081  | H                                    | -0.973437 | -0.379073 | -2.226987 |
| C | 0.759152  | 4.883143  | 2.171845  | H                                    | -1.641357 | 0.020586  | -1.986708 |
| H | 0.958160  | 5.229095  | 3.198057  | TS-HT-a <sup>2+</sup> (acetonitrile) |           |           |           |
| C | -0.144710 | 3.825912  | 1.961795  | Ni                                   | -0.656235 | -1.849255 | -1.830361 |
| H | -0.640914 | 3.367284  | 2.829654  | Fe                                   | 1.175564  | -0.475540 | -0.183864 |
| C | -3.457410 | -1.933540 | -0.277983 | S                                    | 1.141383  | -2.733435 | -0.925406 |
| C | -3.056458 | -2.503815 | -1.506146 | S                                    | 0.853106  | -0.392858 | -2.473805 |
| H | -2.014727 | -2.408530 | -1.845072 | P                                    | 1.643623  | -0.864198 | 1.979554  |
| C | -3.986561 | -3.199455 | -2.298030 | P                                    | 3.127854  | 0.511244  | -0.250283 |
| H | -3.664404 | -3.641680 | -3.253723 | O                                    | 0.285920  | 2.267771  | -0.407734 |
| C | -5.321027 | -3.325187 | -1.872826 | N                                    | -1.745007 | -3.342846 | -1.058654 |
| H | -6.050923 | -3.863848 | -2.497431 | N                                    | -2.058986 | -0.773911 | -2.743548 |
| C | -5.722593 | -2.764021 | -0.646195 | C                                    | 0.374895  | 1.138167  | 0.021434  |
| H | -6.765506 | -2.864216 | -0.306704 | C                                    | 2.687777  | 0.595962  | 2.503799  |
| C | -4.795874 | -2.075005 | 0.154062  | H                                    | 2.031048  | 1.489895  | 2.465214  |
| H | -5.122622 | -1.652000 | 1.116552  | H                                    | 3.058257  | 0.461461  | 3.540601  |
| C | -1.718528 | -2.306614 | 2.007251  | C                                    | 3.825452  | 0.708926  | 1.485465  |
| C | -1.557993 | -3.654355 | 1.613719  | H                                    | 4.557941  | -0.114791 | 1.615916  |
| H | -1.818341 | -3.970236 | 0.591728  | H                                    | 4.379529  | 1.664111  | 1.573607  |
| C | -1.074573 | -4.602655 | 2.531484  | C                                    | 2.782401  | -2.273494 | 2.384752  |
| H | -0.959384 | -5.652261 | 2.218368  | C                                    | 3.590549  | -2.843806 | 1.377668  |
| C | -0.743931 | -4.214931 | 3.842963  | H                                    | 3.491151  | -2.504681 | 0.337093  |
| H | -0.365912 | -4.960197 | 4.560410  | C                                    | 4.523039  | -3.848172 | 1.691661  |
| C | -0.899699 | -2.873221 | 4.236586  | H                                    | 5.143243  | -4.281818 | 0.891061  |
| H | -0.643759 | -2.563225 | 5.261939  | C                                    | 4.659190  | -4.293283 | 3.018215  |
| C | -1.378998 | -1.918491 | 3.323423  | H                                    | 5.385208  | -5.084270 | 3.265410  |
| H | -1.481027 | -0.871042 | 3.645908  | C                                    | 3.865596  | -3.721628 | 4.031031  |
| C | 1.144014  | -2.634114 | -2.396611 | H                                    | 3.971095  | -4.060666 | 5.074095  |
| H | 1.539890  | -3.670386 | -2.385891 | C                                    | 2.935950  | -2.714836 | 3.720055  |
| H | 0.229806  | -2.623718 | -3.023059 | H                                    | 2.327372  | -2.272997 | 4.524614  |
| C | 2.152308  | -1.627899 | -2.908615 | C                                    | 0.335808  | -1.026026 | 3.269641  |
| H | 1.643058  | -0.671991 | -3.130878 | C                                    | -0.053115 | 0.071755  | 4.068020  |
| H | 2.617183  | -1.980223 | -3.855254 | H                                    | 0.427370  | 1.051419  | 3.946311  |
| C | 4.012261  | -2.550786 | -1.499942 | C                                    | -1.061532 | -0.077238 | 5.037132  |
| H | 4.757567  | -2.222729 | -0.751060 | H                                    | -1.353759 | 0.789127  | 5.651368  |
| H | 3.317753  | -3.221179 | -0.958358 | C                                    | -1.695567 | -1.318824 | 5.218179  |
| C | 4.700264  | -3.311505 | -2.632910 | H                                    | -2.488592 | -1.430479 | 5.974475  |
| H | 5.232266  | -4.177804 | -2.189807 | C                                    | -1.310600 | -2.419863 | 4.429252  |
| H | 3.977950  | -3.709509 | -3.373689 | H                                    | -1.794833 | -3.399393 | 4.567793  |
| H | 5.452741  | -2.697311 | -3.166450 | C                                    | -0.302067 | -2.275038 | 3.462895  |
| C | 4.105217  | -0.274116 | -2.512471 | H                                    | 0.010328  | -3.151679 | 2.876637  |
| H | 4.645329  | -0.728910 | -3.369305 | C                                    | 4.513800  | -0.289933 | -1.179933 |
| H | 3.427460  | 0.495800  | -2.928454 | C                                    | 4.301504  | -1.411386 | -2.005802 |
| C | 5.089050  | 0.394818  | -1.561501 | H                                    | 3.290510  | -1.830376 | -2.111609 |

|   |           |           |           |                                      |           |           |           |
|---|-----------|-----------|-----------|--------------------------------------|-----------|-----------|-----------|
| C | 5.380580  | -2.005683 | -2.685756 | C                                    | -2.815628 | 0.986736  | 1.399114  |
| H | 5.202427  | -2.883833 | -3.326748 | C                                    | -5.034222 | 0.862212  | 0.305986  |
| C | 6.677511  | -1.482118 | -2.544680 | C                                    | -5.254678 | -0.449105 | 0.826954  |
| H | 7.523041  | -1.949167 | -3.074610 | C                                    | -4.239906 | -1.002997 | 1.681777  |
| C | 6.894038  | -0.356644 | -1.725737 | C                                    | -3.067674 | -0.309241 | 1.932536  |
| H | 7.907904  | 0.060394  | -1.615221 | N                                    | -1.630709 | 1.601043  | 1.746483  |
| C | 5.818621  | 0.240955  | -1.048095 | H                                    | -2.472531 | 5.674715  | -0.327850 |
| H | 5.996908  | 1.127900  | -0.418722 | H                                    | 0.952232  | 5.271382  | 2.383955  |
| C | 3.128227  | 2.206477  | -0.975437 | H                                    | 0.315092  | 2.932936  | 2.799277  |
| C | 3.130314  | 2.342224  | -2.381305 | H                                    | -5.786094 | 1.336763  | -0.339384 |
| H | 3.233956  | 1.450947  | -3.021584 | H                                    | -4.373061 | -1.992714 | 2.136523  |
| C | 2.996308  | 3.611364  | -2.969349 | H                                    | -2.294062 | -0.754739 | 2.571068  |
| H | 3.000254  | 3.707778  | -4.066912 | S                                    | -3.616142 | 3.115419  | -0.215150 |
| C | 2.859043  | 4.754242  | -2.158306 | N                                    | -6.372395 | -1.169523 | 0.500084  |
| H | 2.752041  | 5.749313  | -2.619096 | N                                    | -0.332548 | 6.963805  | 0.702223  |
| C | 2.856334  | 4.621751  | -0.758079 | C                                    | -1.063321 | 7.748982  | -0.289776 |
| H | 2.737487  | 5.510389  | -0.118301 | H                                    | -2.108742 | 7.949871  | 0.034119  |
| C | 2.983105  | 3.353289  | -0.166632 | H                                    | -0.552231 | 8.717252  | -0.434681 |
| H | 2.936807  | 3.265073  | 0.929871  | H                                    | -1.097013 | 7.225484  | -1.269051 |
| C | 0.339601  | -3.951807 | 0.204278  | C                                    | -7.347799 | -0.623708 | -0.437750 |
| H | 0.527046  | -4.962253 | -0.210894 | H                                    | -7.808790 | 0.311868  | -0.051343 |
| H | 0.824264  | -3.897746 | 1.199269  | H                                    | -6.882032 | -0.397968 | -1.423006 |
| C | -1.135285 | -3.615631 | 0.291567  | H                                    | -8.152871 | -1.362412 | -0.598238 |
| H | -1.699496 | -4.423166 | 0.809366  | C                                    | 0.772611  | 7.590116  | 1.426574  |
| H | -1.266437 | -2.680513 | 0.873872  | H                                    | 0.842525  | 8.651204  | 1.129235  |
| C | -1.570797 | -4.477330 | -2.040380 | H                                    | 0.611620  | 7.548783  | 2.525017  |
| H | -0.494558 | -4.538899 | -2.293055 | H                                    | 1.744719  | 7.101523  | 1.198098  |
| H | -2.085063 | -4.160245 | -2.968412 | C                                    | -6.560825 | -2.518350 | 1.028457  |
| C | -2.079501 | -5.847284 | -1.588676 | H                                    | -5.745661 | -3.202645 | 0.705393  |
| H | -1.894061 | -6.572462 | -2.407484 | H                                    | -6.596274 | -2.521170 | 2.139503  |
| H | -1.545255 | -6.217814 | -0.690464 | H                                    | -7.518334 | -2.922273 | 0.654944  |
| H | -3.168120 | -5.855752 | -1.379573 | TS-HT-b <sup>2+</sup> (acetonitrile) |           |           |           |
| C | -3.190291 | -3.049888 | -0.821202 | Ni                                   | -2.738935 | 0.712646  | 0.538210  |
| H | -3.229005 | -2.406554 | 0.076078  | Fe                                   | -0.238909 | -0.872182 | 0.107044  |
| H | -3.708027 | -3.997360 | -0.561417 | S                                    | -1.926821 | -0.096782 | -1.321470 |
| C | -3.915134 | -2.331351 | -1.950234 | S                                    | -0.636405 | 1.257286  | 0.879514  |
| H | -4.981521 | -2.263191 | -1.651008 | P                                    | 0.236692  | -2.663831 | -1.124725 |
| H | -3.900394 | -2.906265 | -2.899001 | P                                    | 1.580802  | -1.359865 | 1.323090  |
| C | -3.412185 | -0.905918 | -2.129380 | O                                    | -1.904594 | -2.162056 | 2.147739  |
| H | -4.133932 | -0.303840 | -2.721828 | N                                    | -4.443868 | -0.312685 | 0.229714  |
| H | -3.337821 | -0.426973 | -1.136442 | N                                    | -3.291344 | 1.805132  | 2.162400  |
| C | -2.028759 | -1.247788 | -4.175166 | C                                    | -1.264978 | -1.663316 | 1.291570  |
| H | -2.238996 | -2.334677 | -4.150119 | C                                    | 1.427060  | -3.723116 | -0.161898 |
| H | -0.984292 | -1.151634 | -4.529095 | H                                    | 0.789395  | -4.277543 | 0.556509  |
| C | -2.981108 | -0.541181 | -5.140222 | H                                    | 1.905313  | -4.482575 | -0.812152 |
| H | -2.823125 | -0.961293 | -6.154702 | C                                    | 2.445604  | -2.834753 | 0.552494  |
| H | -4.047121 | -0.697076 | -4.879036 | H                                    | 3.175960  | -2.413675 | -0.168815 |
| H | -2.788328 | 0.549366  | -5.198882 | H                                    | 3.007867  | -3.394632 | 1.326626  |
| C | -1.663168 | 0.672019  | -2.591411 | C                                    | 1.039961  | -2.376473 | -2.760521 |
| H | -1.724548 | 0.889974  | -1.507410 | C                                    | 2.190918  | -3.079224 | -3.183520 |
| H | -2.405259 | 1.323504  | -3.102995 | H                                    | 2.647044  | -3.851608 | -2.546622 |
| C | -0.259401 | 0.948871  | -3.086718 | C                                    | 2.784076  | -2.784994 | -4.424361 |
| H | 0.111121  | 1.918839  | -2.703375 | H                                    | 3.687819  | -3.331809 | -4.737252 |
| H | -0.177351 | 0.949921  | -4.191800 | C                                    | 2.230783  | -1.796774 | -5.258821 |
| H | -0.495831 | 0.898199  | 0.905490  | H                                    | 2.701381  | -1.565095 | -6.227701 |
| C | -0.696244 | 5.674508  | 0.967988  | C                                    | 1.075402  | -1.105489 | -4.850595 |
| C | 0.063870  | 4.863673  | 1.885085  | H                                    | 0.635010  | -0.329118 | -5.496242 |
| C | -1.844616 | 5.084045  | 0.353402  | C                                    | 0.488989  | -1.390005 | -3.607531 |
| C | -2.195958 | 3.757015  | 0.614236  | H                                    | -0.400217 | -0.832087 | -3.278844 |
| C | -1.424148 | 2.931112  | 1.504609  | C                                    | -1.114861 | -3.861149 | -1.533367 |
| C | -0.294424 | 3.552387  | 2.125037  | C                                    | -1.433592 | -4.218717 | -2.862603 |
| C | -3.842291 | 1.548721  | 0.572415  | H                                    | -0.842656 | -3.820706 | -3.701453 |



|   |           |           |           |                                      |           |           |           |
|---|-----------|-----------|-----------|--------------------------------------|-----------|-----------|-----------|
| C | -2.521659 | -5.071002 | -3.125465 | C                                    | -0.897990 | 1.331111  | 2.711172  |
| H | -2.764916 | -5.335310 | -4.167026 | H                                    | -1.102039 | 0.313252  | 3.095229  |
| C | -3.296585 | -5.579245 | -2.067971 | H                                    | 0.018126  | 1.716338  | 3.202119  |
| H | -4.153203 | -6.239654 | -2.277196 | H                                    | 0.780784  | -0.031969 | -1.012924 |
| C | -2.969360 | -5.245254 | -0.739978 | C                                    | -1.052359 | 4.431762  | -1.882904 |
| H | -3.565114 | -5.645782 | 0.095684  | C                                    | -1.302212 | 3.282461  | -2.709120 |
| C | -1.886237 | -4.392008 | -0.473531 | C                                    | 0.190717  | 4.482269  | -1.178014 |
| H | -1.649304 | -4.132867 | 0.569091  | C                                    | 1.076233  | 3.402094  | -1.210143 |
| C | 1.186821  | -1.946650 | 3.050660  | C                                    | 0.761341  | 2.185656  | -1.916265 |
| C | 1.168632  | -1.034038 | 4.129454  | C                                    | -0.428379 | 2.210405  | -2.707768 |
| H | 1.466399  | 0.013559  | 3.974053  | C                                    | 3.483062  | 2.126210  | -0.842450 |
| C | 0.784846  | -1.451582 | 5.415800  | C                                    | 2.803971  | 1.029315  | -1.465487 |
| H | 0.778340  | -0.723370 | 6.242807  | C                                    | 4.834006  | 2.047437  | -0.490369 |
| C | 0.422258  | -2.790513 | 5.648551  | C                                    | 5.564393  | 0.834079  | -0.662019 |
| H | 0.125394  | -3.118530 | 6.657603  | C                                    | 4.887412  | -0.268985 | -1.291884 |
| C | 0.447954  | -3.708649 | 4.583536  | C                                    | 3.566689  | -0.154912 | -1.681826 |
| H | 0.171873  | -4.761987 | 4.752210  | N                                    | 1.493113  | 1.024560  | -1.884026 |
| C | 0.820890  | -3.290311 | 3.294466  | H                                    | 0.473801  | 5.385575  | -0.620030 |
| H | 0.812710  | -4.028323 | 2.479464  | H                                    | -2.197366 | 3.233384  | -3.342038 |
| C | 2.952325  | -0.192047 | 1.748969  | H                                    | -0.627334 | 1.341750  | -3.347132 |
| C | 2.664287  | 1.163274  | 2.001550  | H                                    | 5.308545  | 2.915593  | -0.014812 |
| H | 1.681980  | 1.571485  | 1.724258  | H                                    | 5.413631  | -1.214121 | -1.476768 |
| C | 3.628486  | 2.004978  | 2.582877  | H                                    | 3.062569  | -0.997099 | -2.173229 |
| H | 3.381444  | 3.060529  | 2.776214  | S                                    | 2.627481  | 3.603926  | -0.400379 |
| C | 4.903300  | 1.504729  | 2.893023  | N                                    | 6.855648  | 0.715331  | -0.230076 |
| H | 5.658662  | 2.161529  | 3.352723  | N                                    | -1.958062 | 5.450340  | -1.797777 |
| C | 5.217344  | 0.163632  | 2.599834  | C                                    | -1.704182 | 6.591261  | -0.923652 |
| H | 6.224142  | -0.228508 | 2.813695  | H                                    | -0.836394 | 7.193779  | -1.273033 |
| C | 4.247890  | -0.683938 | 2.039619  | H                                    | -2.595117 | 7.243696  | -0.908952 |
| H | 4.507378  | -1.735609 | 1.848146  | H                                    | -1.501551 | 6.259941  | 0.117525  |
| C | -3.277318 | -1.273159 | -1.771403 | C                                    | 7.550903  | 1.866322  | 0.336498  |
| H | -3.864446 | -0.780595 | -2.572949 | H                                    | 7.574864  | 2.715593  | -0.380573 |
| H | -2.848366 | -2.203978 | -2.185863 | H                                    | 7.063860  | 2.216667  | 1.272732  |
| C | -4.090399 | -1.564287 | -0.533762 | H                                    | 8.592327  | 1.584378  | 0.572059  |
| H | -3.494588 | -2.196741 | 0.148207  | C                                    | -3.182937 | 5.421333  | -2.594214 |
| H | -5.016148 | -2.129069 | -0.779437 | H                                    | -2.961980 | 5.436637  | -3.683873 |
| C | -5.356055 | 0.582594  | -0.567721 | H                                    | -3.789700 | 4.517450  | -2.373897 |
| H | -4.780520 | 0.912409  | -1.454431 | H                                    | -3.791378 | 6.310617  | -2.352574 |
| H | -5.522675 | 1.491683  | 0.036226  | C                                    | 7.543515  | -0.571218 | -0.302382 |
| C | -6.699328 | -0.012084 | -0.992173 | H                                    | 6.962233  | -1.367346 | 0.210566  |
| H | -7.258403 | 0.762341  | -1.556712 | H                                    | 7.718558  | -0.888655 | -1.354077 |
| H | -6.586220 | -0.890283 | -1.659424 | H                                    | 8.523718  | -0.485638 | 0.199222  |
| H | -7.325299 | -0.306171 | -0.125445 | TS-HT-c <sup>2+</sup> (acetonitrile) |           |           |           |
| C | -5.040450 | -0.775996 | 1.521808  | Ni                                   | -0.291277 | -1.129773 | 2.374457  |
| H | -5.961242 | -1.358817 | 1.301007  | Fe                                   | 0.228119  | -0.900767 | -0.279286 |
| H | -4.305823 | -1.482022 | 1.957718  | S                                    | 1.716221  | -0.627298 | 1.548340  |
| C | -5.342256 | 0.312553  | 2.541023  | S                                    | -0.026541 | -2.875526 | 1.051992  |
| H | -5.858617 | -0.180518 | 3.391052  | P                                    | -0.934556 | -1.602959 | -2.020725 |
| H | -6.069011 | 1.052782  | 2.147844  | P                                    | 2.028663  | -1.960966 | -1.403131 |
| C | -4.100882 | 0.984604  | 3.120287  | O                                    | -2.031709 | 0.686548  | 0.668447  |
| H | -3.420123 | 0.206459  | 3.522513  | N                                    | -0.198301 | 0.505977  | 3.545814  |
| H | -4.397212 | 1.642920  | 3.968002  | N                                    | -2.073047 | -1.863156 | 2.948775  |
| C | -4.064691 | 3.019995  | 1.721251  | C                                    | -1.105405 | -0.004756 | 0.396828  |
| H | -5.089874 | 2.694678  | 1.467459  | C                                    | -0.144851 | -3.165429 | -2.662358 |
| H | -4.156994 | 3.698236  | 2.600044  | H                                    | -0.300596 | -3.949304 | -1.892410 |
| C | -3.450222 | 3.744216  | 0.528666  | H                                    | -0.645568 | -3.482730 | -3.600298 |
| H | -4.050653 | 4.646858  | 0.296431  | C                                    | 1.338405  | -2.863720 | -2.889692 |
| H | -2.408545 | 4.069809  | 0.718301  | H                                    | 1.449128  | -2.190112 | -3.763225 |
| H | -3.433357 | 3.094142  | -0.370606 | H                                    | 1.933193  | -3.774264 | -3.102034 |
| C | -2.059185 | 2.280116  | 2.903662  | C                                    | -0.872121 | -0.556553 | -3.547507 |
| H | -2.309240 | 2.412594  | 3.978553  | C                                    | 0.272569  | 0.240558  | -3.774746 |
| H | -1.779528 | 3.274934  | 2.507164  | H                                    | 1.074800  | 0.272738  | -3.022279 |

|   |           |           |           |                             |           |           |           |
|---|-----------|-----------|-----------|-----------------------------|-----------|-----------|-----------|
| C | 0.369585  | 1.027916  | -4.933758 | H                           | -3.979274 | -1.353856 | 3.742695  |
| H | 1.264947  | 1.648611  | -5.096663 | C                           | -1.735664 | -2.824313 | 4.064223  |
| C | -0.681991 | 1.037302  | -5.868399 | H                           | -1.276144 | -2.220768 | 4.868746  |
| H | -0.614791 | 1.668057  | -6.769236 | H                           | -0.932043 | -3.488014 | 3.691932  |
| C | -1.822642 | 0.241239  | -5.649765 | C                           | -2.892129 | -3.654926 | 4.621570  |
| H | -2.647274 | 0.244578  | -6.380523 | H                           | -2.490246 | -4.316569 | 5.416304  |
| C | -1.916647 | -0.560498 | -4.498675 | H                           | -3.686212 | -3.031847 | 5.080098  |
| H | -2.814283 | -1.176911 | -4.332991 | H                           | -3.354451 | -4.305540 | 3.851859  |
| C | -2.721063 | -2.018114 | -1.837140 | C                           | -2.668118 | -2.559397 | 1.753031  |
| C | -3.622268 | -0.987857 | -1.482225 | H                           | -2.874291 | -1.777701 | 0.998544  |
| H | -3.262091 | 0.041960  | -1.365862 | H                           | -3.642813 | -3.019190 | 2.027871  |
| C | -4.982521 | -1.266190 | -1.277787 | C                           | -1.725270 | -3.583575 | 1.164859  |
| H | -5.667380 | -0.448217 | -1.001914 | H                           | -2.064932 | -3.891112 | 0.157357  |
| C | -5.463255 | -2.581509 | -1.419084 | H                           | -1.641169 | -4.498261 | 1.786843  |
| H | -6.529122 | -2.803754 | -1.251005 | H                           | 0.172140  | 0.776669  | -0.904617 |
| C | -4.576547 | -3.610096 | -1.783350 | C                           | -3.978669 | 3.408621  | -1.046484 |
| H | -4.945087 | -4.641095 | -1.905458 | C                           | -3.477692 | 2.539093  | -2.078636 |
| C | -3.213331 | -3.333395 | -1.997528 | C                           | -3.026664 | 3.964757  | -0.136705 |
| H | -2.545403 | -4.158099 | -2.286055 | C                           | -1.677338 | 3.610915  | -0.203046 |
| C | 3.487504  | -1.019623 | -2.039667 | C                           | -1.186893 | 2.668430  | -1.175035 |
| C | 4.212923  | -0.199045 | -1.144111 | C                           | -2.141742 | 2.190752  | -2.121017 |
| H | 3.850477  | -0.048399 | -0.115456 | C                           | 0.993133  | 3.896221  | 0.353056  |
| C | 5.390892  | 0.444164  | -1.560230 | C                           | 1.135391  | 2.866365  | -0.634051 |
| H | 5.959523  | 1.053625  | -0.840303 | C                           | 2.103447  | 4.540624  | 0.911735  |
| C | 5.834493  | 0.320141  | -2.888569 | C                           | 3.429160  | 4.182454  | 0.520781  |
| H | 6.751978  | 0.834073  | -3.216565 | C                           | 3.572019  | 3.149652  | -0.472052 |
| C | 5.097037  | -0.460981 | -3.796284 | C                           | 2.463977  | 2.522987  | -1.012531 |
| H | 5.430794  | -0.558999 | -4.841690 | N                           | 0.103806  | 2.198507  | -1.263593 |
| C | 3.939026  | -1.138184 | -3.374417 | H                           | -3.344253 | 4.695651  | 0.619673  |
| H | 3.400334  | -1.764454 | -4.100421 | H                           | -4.152582 | 2.125996  | -2.838961 |
| C | 2.846651  | -3.322502 | -0.432584 | H                           | -1.784240 | 1.511170  | -2.902441 |
| C | 3.901408  | -3.050042 | 0.468082  | H                           | 1.937906  | 5.332910  | 1.654658  |
| H | 4.325853  | -2.040179 | 0.546762  | H                           | 4.567423  | 2.842066  | -0.812546 |
| C | 4.438726  | -4.069531 | 1.273993  | H                           | 2.588566  | 1.730992  | -1.765825 |
| H | 5.264447  | -3.833878 | 1.964461  | S                           | -0.594694 | 4.385499  | 0.950653  |
| C | 3.932055  | -5.378819 | 1.196663  | N                           | 4.524081  | 4.793115  | 1.064913  |
| H | 4.354282  | -6.176747 | 1.828243  | N                           | -5.307303 | 3.704142  | -0.955378 |
| C | 2.884908  | -5.661253 | 0.301720  | C                           | -5.799285 | 4.568741  | 0.114781  |
| H | 2.479770  | -6.683108 | 0.225919  | H                           | -5.389476 | 5.599060  | 0.027395  |
| C | 2.342830  | -4.643099 | -0.501514 | H                           | -6.900312 | 4.627337  | 0.057888  |
| H | 1.515864  | -4.900992 | -1.178423 | H                           | -5.523167 | 4.168035  | 1.113955  |
| C | 1.901305  | 1.049674  | 2.289785  | C                           | 4.358331  | 5.819286  | 2.090319  |
| H | 2.639924  | 0.947730  | 3.111016  | H                           | 3.784068  | 6.690444  | 1.705166  |
| H | 2.330292  | 1.734001  | 1.535355  | H                           | 3.826594  | 5.419979  | 2.981844  |
| C | 0.559030  | 1.546646  | 2.768180  | H                           | 5.352407  | 6.176123  | 2.412174  |
| H | -0.070379 | 1.793766  | 1.895323  | C                           | -6.257533 | 3.159640  | -1.925048 |
| H | 0.664350  | 2.475993  | 3.370311  | H                           | -6.010363 | 3.479233  | -2.960162 |
| C | 0.551733  | 0.044560  | 4.772912  | H                           | -6.274070 | 2.048358  | -1.897208 |
| H | -0.079967 | -0.721101 | 5.261263  | H                           | -7.270165 | 3.527724  | -1.683560 |
| H | 1.454225  | -0.491590 | 4.420736  | C                           | 5.871198  | 4.414534  | 0.641657  |
| C | 0.940456  | 1.128694  | 5.779070  | H                           | 6.081153  | 3.344364  | 0.859156  |
| H | 1.473066  | 0.643035  | 6.622444  | H                           | 6.019795  | 4.584117  | -0.446693 |
| H | 1.627671  | 1.882073  | 5.343736  | H                           | 6.608025  | 5.028699  | 1.188871  |
| H | 0.061989  | 1.656176  | 6.202424  | TS-PTa <sup>+</sup> (water) |           |           |           |
| C | -1.520395 | 1.115433  | 3.890764  | Ni                          | -1.389627 | -1.683375 | 0.769501  |
| H | -1.349932 | 1.945282  | 4.609452  | Fe                          | 0.592844  | 0.072295  | -0.549952 |
| H | -1.902858 | 1.571175  | 2.957131  | S                           | 0.102162  | -0.358084 | 1.742989  |
| C | -2.568027 | 0.150982  | 4.433552  | S                           | 0.389365  | -2.259957 | -0.406277 |
| H | -3.440299 | 0.764099  | 4.742043  | P                           | 0.875602  | 2.273551  | -0.426829 |
| H | -2.226210 | -0.363071 | 5.355455  | P                           | 2.873451  | -0.031576 | -0.340040 |
| C | -3.066554 | -0.832943 | 3.382402  | O                           | 0.918356  | 0.022029  | -3.439000 |
| H | -3.352677 | -0.273036 | 2.471342  | N                           | -2.793908 | -0.974421 | 2.015473  |

|   |           |           |           |                             |           |           |           |
|---|-----------|-----------|-----------|-----------------------------|-----------|-----------|-----------|
| N | -2.479710 | -2.897918 | -0.365917 | H                           | -2.971779 | -1.843169 | 5.407037  |
| C | 0.812993  | 0.060543  | -2.273603 | H                           | -2.937098 | -0.161905 | 4.799529  |
| C | 2.496871  | 2.597265  | -1.281663 | H                           | -4.355002 | -1.216687 | 4.465399  |
| H | 2.360698  | 2.339375  | -2.352426 | C                           | -4.232776 | -1.105310 | 1.613769  |
| H | 2.765876  | 3.669939  | -1.204444 | H                           | -4.458604 | -0.271569 | 0.925178  |
| C | 3.550412  | 1.698228  | -0.618942 | H                           | -4.859605 | -0.943302 | 2.515387  |
| H | 3.811930  | 2.102047  | 0.379891  | C                           | -4.600613 | -2.421662 | 0.944846  |
| H | 4.487869  | 1.649259  | -1.207021 | H                           | -5.698278 | -2.408760 | 0.783048  |
| C | 1.118831  | 3.093659  | 1.211164  | H                           | -4.402033 | -3.292184 | 1.603877  |
| C | 1.837304  | 2.423375  | 2.228300  | C                           | -3.938174 | -2.574789 | -0.417438 |
| H | 2.195377  | 1.394050  | 2.080488  | H                           | -4.449294 | -3.357249 | -1.017427 |
| C | 2.076275  | 3.049857  | 3.461916  | H                           | -4.027611 | -1.619897 | -0.970486 |
| H | 2.633338  | 2.510451  | 4.243685  | C                           | -2.238091 | -4.277211 | 0.200202  |
| C | 1.597213  | 4.351131  | 3.697314  | H                           | -2.586441 | -4.248043 | 1.251230  |
| H | 1.775712  | 4.838961  | 4.668487  | H                           | -1.143205 | -4.425583 | 0.255234  |
| C | 0.887922  | 5.026654  | 2.688036  | C                           | -2.886167 | -5.440005 | -0.551195 |
| H | 0.512558  | 6.047186  | 2.863120  | H                           | -2.578015 | -6.384928 | -0.059011 |
| C | 0.651723  | 4.406076  | 1.448801  | H                           | -3.993537 | -5.400843 | -0.530366 |
| H | 0.098733  | 4.950267  | 0.668259  | H                           | -2.554633 | -5.492250 | -1.608131 |
| C | -0.434905 | 3.231369  | -1.262726 | C                           | -1.948571 | -2.721675 | -1.764939 |
| C | -0.270642 | 3.769717  | -2.556243 | H                           | -2.132957 | -1.664059 | -2.035452 |
| H | 0.698308  | 3.706762  | -3.074087 | H                           | -2.523565 | -3.359770 | -2.472486 |
| C | -1.360489 | 4.387347  | -3.196754 | C                           | -0.464807 | -3.012754 | -1.862159 |
| H | -1.230846 | 4.803470  | -4.208186 | H                           | -0.040414 | -2.588358 | -2.792741 |
| C | -2.609146 | 4.468346  | -2.554744 | H                           | -0.231977 | -4.096326 | -1.837704 |
| H | -3.462315 | 4.940074  | -3.066720 | H                           | -1.012835 | 0.226833  | -0.446952 |
| C | -2.773269 | 3.932102  | -1.263920 | C                           | -4.172425 | 1.468005  | -3.191581 |
| H | -3.755753 | 3.941773  | -0.767855 | H                           | -4.873188 | 2.121652  | -2.636450 |
| C | -1.692878 | 3.309692  | -0.622580 | H                           | -3.704328 | 2.025253  | -4.024886 |
| H | -1.830698 | 2.868297  | 0.377158  | H                           | -4.759129 | 0.625275  | -3.617111 |
| C | 3.653500  | -0.635294 | 1.217084  | C                           | -3.127036 | 0.889285  | -2.246580 |
| C | 3.097465  | -1.754233 | 1.879071  | O                           | -3.477306 | 0.627943  | -1.050977 |
| H | 2.209637  | -2.257989 | 1.468743  | O                           | -1.959995 | 0.648271  | -2.704115 |
| C | 3.675914  | -2.238199 | 3.064500  | H                           | -0.999425 | 0.331388  | -1.344602 |
| H | 3.231020  | -3.110806 | 3.567824  | O                           | -5.166997 | 2.160539  | 0.305649  |
| C | 4.809066  | -1.606732 | 3.606301  | H                           | -6.011029 | 2.081249  | -0.180626 |
| H | 5.257403  | -1.980982 | 4.540053  | H                           | -4.551498 | 1.594288  | -0.257124 |
| C | 5.370870  | -0.496672 | 2.949573  | TS-PTb <sup>+</sup> (water) |           |           |           |
| H | 6.263333  | -0.001494 | 3.363345  | Ni                          | 2.077231  | -0.984250 | -1.161331 |
| C | 4.801579  | -0.012826 | 1.759248  | Fe                          | -0.368970 | 0.128298  | -0.040124 |
| H | 5.266182  | 0.850287  | 1.259696  | S                           | 1.067889  | 0.849771  | -1.814686 |
| C | 3.626157  | -1.083732 | -1.653264 | S                           | 0.042397  | -1.814977 | -1.291850 |
| C | 3.755870  | -2.477866 | -1.458693 | P                           | -0.647426 | 2.106375  | 1.003349  |
| H | 3.506437  | -2.934768 | -0.489675 | P                           | -2.026084 | -0.700124 | 1.213767  |
| C | 4.217396  | -3.296050 | -2.504034 | O                           | 1.514282  | -0.814055 | 1.985988  |
| H | 4.318821  | -4.380312 | -2.339279 | N                           | 3.716211  | 0.091053  | -0.695726 |
| C | 4.552365  | -2.734700 | -3.749665 | N                           | 2.828578  | -2.849927 | -0.921666 |
| H | 4.914634  | -3.378109 | -4.566840 | C                           | 0.835127  | -0.401006 | 1.119812  |
| C | 4.425642  | -1.347817 | -3.946461 | C                           | -1.884677 | 1.858906  | 2.386916  |
| H | 4.687101  | -0.899368 | -4.917843 | H                           | -1.285687 | 1.617908  | 3.287287  |
| C | 3.961557  | -0.523693 | -2.906872 | H                           | -2.408063 | 2.813805  | 2.591583  |
| H | 3.850345  | 0.556198  | -3.088797 | C                           | -2.873257 | 0.738891  | 2.058020  |
| C | -1.090769 | 0.795313  | 2.560028  | H                           | -3.629865 | 1.078305  | 1.323179  |
| H | -0.946152 | 0.642620  | 3.648579  | H                           | -3.397677 | 0.374104  | 2.964091  |
| H | -0.820822 | 1.842642  | 2.325478  | C                           | -1.264605 | 3.529214  | 0.004694  |
| C | -2.504140 | 0.499231  | 2.106731  | C                           | -1.796643 | 4.669875  | 0.649433  |
| H | -3.240347 | 0.992253  | 2.780207  | H                           | -1.859987 | 4.714177  | 1.748284  |
| H | -2.664670 | 0.896532  | 1.086504  | C                           | -2.232943 | 5.768959  | -0.108891 |
| C | -2.541749 | -1.726771 | 3.302922  | H                           | -2.648279 | 6.652029  | 0.401755  |
| H | -1.448971 | -1.741848 | 3.477400  | C                           | -2.136926 | 5.743185  | -1.513108 |
| H | -2.831435 | -2.777160 | 3.101969  | H                           | -2.481477 | 6.605781  | -2.105117 |
| C | -3.250204 | -1.195982 | 4.550405  | C                           | -1.599028 | 4.614975  | -2.156802 |

|   |           |           |           |                             |           |           |           |
|---|-----------|-----------|-----------|-----------------------------|-----------|-----------|-----------|
| H | -1.521974 | 4.584689  | -3.254879 | H                           | 3.667353  | -3.205244 | -4.283290 |
| C | -1.164313 | 3.512727  | -1.401301 | H                           | 2.012867  | -3.269469 | -3.595690 |
| H | -0.758767 | 2.627609  | -1.912728 | H                           | 2.940203  | -1.737016 | -3.544756 |
| C | 0.824694  | 2.817328  | 1.864197  | C                           | 1.703552  | -3.861546 | -0.806753 |
| C | 1.474474  | 3.971010  | 1.371053  | H                           | 2.057569  | -4.729721 | -0.210039 |
| H | 1.047387  | 4.529121  | 0.523956  | H                           | 1.477324  | -4.234797 | -1.823681 |
| C | 2.675378  | 4.412497  | 1.953444  | C                           | 0.449152  | -3.260959 | -0.214084 |
| H | 3.175600  | 5.307533  | 1.551690  | H                           | 0.585100  | -2.931828 | 0.832272  |
| C | 3.233819  | 3.716772  | 3.039788  | H                           | -0.395542 | -3.976904 | -0.252822 |
| H | 4.177937  | 4.060489  | 3.490685  | H                           | -1.330919 | 0.367939  | -1.323309 |
| C | 2.575159  | 2.585474  | 3.556120  | C                           | -5.087493 | 0.693424  | -2.714244 |
| H | 2.996924  | 2.042663  | 4.416454  | H                           | -5.742881 | 0.451023  | -1.856553 |
| C | 1.378651  | 2.136614  | 2.974440  | H                           | -5.514768 | 1.559879  | -3.262731 |
| H | 0.889579  | 1.241493  | 3.385916  | H                           | -5.052886 | -0.161303 | -3.419010 |
| C | -1.540822 | -1.855668 | 2.562464  | C                           | -3.672021 | 1.038162  | -2.268779 |
| C | -1.647700 | -3.252690 | 2.380347  | O                           | -2.744645 | 1.026412  | -3.140183 |
| H | -2.091771 | -3.657121 | 1.457913  | O                           | -3.476026 | 1.322308  | -1.033914 |
| C | -1.188723 | -4.133454 | 3.374297  | H                           | -1.973972 | 0.782026  | -0.851264 |
| H | -1.277161 | -5.220324 | 3.219807  | O                           | -2.435095 | -1.378724 | -4.309438 |
| C | -0.622536 | -3.630095 | 4.559510  | H                           | -3.292562 | -1.817721 | -4.149758 |
| H | -0.263129 | -4.321651 | 5.337708  | H                           | -2.594834 | -0.463400 | -3.934858 |
| C | -0.519726 | -2.239713 | 4.748769  | TS-PTc <sup>+</sup> (water) |           |           |           |
| H | -0.081249 | -1.836991 | 5.675253  | Ni                          | -2.314095 | -0.818637 | 0.448563  |
| C | -0.971908 | -1.355052 | 3.755518  | Fe                          | 0.168445  | -0.012735 | -0.070132 |
| H | -0.869305 | -0.271864 | 3.916469  | S                           | -0.544793 | -2.133917 | 0.723772  |
| C | -3.410644 | -1.590700 | 0.387178  | S                           | -1.490203 | -0.727825 | -1.618604 |
| C | -3.417333 | -1.865875 | -0.994764 | P                           | 0.860003  | 1.850577  | -1.056127 |
| H | -2.591691 | -1.542904 | -1.644797 | P                           | 1.798827  | -1.032564 | -1.376412 |
| C | -4.510341 | -2.537869 | -1.569840 | O                           | -1.519736 | 1.765442  | 1.547632  |
| H | -4.508283 | -2.748984 | -2.650361 | N                           | -2.815323 | -1.181755 | 2.360739  |
| C | -5.603238 | -2.929915 | -0.778579 | N                           | -3.908840 | 0.230593  | -0.161263 |
| H | -6.457566 | -3.452912 | -1.236339 | C                           | -1.018130 | 0.923907  | 0.885376  |
| C | -5.603193 | -2.649833 | 0.600791  | C                           | 1.511913  | 1.383614  | -2.735864 |
| H | -6.456478 | -2.951581 | 1.228425  | H                           | 0.643994  | 1.053961  | -3.344234 |
| C | -4.510791 | -1.987690 | 1.183893  | H                           | 1.972089  | 2.269354  | -3.219805 |
| H | -4.512262 | -1.785920 | 2.267012  | C                           | 2.518792  | 0.248072  | -2.533370 |
| C | 2.344709  | 2.083484  | -1.329574 | H                           | 3.437182  | 0.629114  | -2.039604 |
| H | 2.886807  | 2.363447  | -2.255374 | H                           | 2.819021  | -0.224287 | -3.489406 |
| H | 1.845284  | 2.991417  | -0.942590 | C                           | 2.316636  | 2.705629  | -0.297478 |
| C | 3.240789  | 1.462592  | -0.285086 | C                           | 3.248763  | 1.990503  | 0.485995  |
| H | 2.676115  | 1.335777  | 0.656934  | H                           | 3.094331  | 0.928978  | 0.731336  |
| H | 4.111796  | 2.113340  | -0.055173 | C                           | 4.403421  | 2.626706  | 0.975000  |
| C | 4.583254  | 0.160341  | -1.928756 | H                           | 5.103931  | 2.035960  | 1.584622  |
| H | 3.930637  | 0.488098  | -2.760699 | C                           | 4.636513  | 3.983877  | 0.693803  |
| H | 4.884130  | -0.872271 | -2.175048 | H                           | 5.537163  | 4.482719  | 1.085350  |
| C | 5.821628  | 1.051718  | -1.838979 | C                           | 3.714752  | 4.702618  | -0.089803 |
| H | 6.371356  | 0.975525  | -2.799192 | H                           | 3.890915  | 5.765679  | -0.318303 |
| H | 5.567823  | 2.119816  | -1.686263 | C                           | 2.564076  | 4.068239  | -0.587495 |
| H | 6.514682  | 0.734294  | -1.033983 | H                           | 1.855501  | 4.640662  | -1.206276 |
| C | 4.427589  | -0.474298 | 0.494784  | C                           | -0.348169 | 3.202975  | -1.338054 |
| H | 5.327348  | 0.145941  | 0.696642  | C                           | -0.755029 | 3.990133  | -0.234800 |
| H | 3.744819  | -0.335254 | 1.353687  | H                           | -0.280132 | 3.847104  | 0.747308  |
| C | 4.823614  | -1.941227 | 0.402828  | C                           | -1.761910 | 4.955348  | -0.388014 |
| H | 5.370787  | -2.178160 | 1.339014  | H                           | -2.074504 | 5.558206  | 0.478917  |
| H | 5.556557  | -2.111304 | -0.412124 | C                           | -2.370176 | 5.149596  | -1.642780 |
| C | 3.656194  | -2.923632 | 0.326028  | H                           | -3.167185 | 5.900654  | -1.759571 |
| H | 2.965771  | -2.749647 | 1.175251  | C                           | -1.945701 | 4.394470  | -2.749740 |
| H | 4.047698  | -3.962009 | 0.414588  | H                           | -2.401648 | 4.555897  | -3.739024 |
| C | 3.650804  | -3.237268 | -2.124228 | C                           | -0.933428 | 3.429000  | -2.603033 |
| H | 4.644033  | -2.764777 | -2.027372 | H                           | -0.609067 | 2.856471  | -3.484414 |
| H | 3.823741  | -4.335574 | -2.071030 | C                           | 3.242853  | -1.805268 | -0.537049 |
| C | 3.025109  | -2.840025 | -3.456322 | C                           | 3.067172  | -2.428890 | 0.716697  |

|   |           |           |           |                    |           |           |           |
|---|-----------|-----------|-----------|--------------------|-----------|-----------|-----------|
| H | 2.089355  | -2.388942 | 1.215594  | O                  | 1.051604  | 1.171981  | 2.883230  |
| C | 4.137951  | -3.094655 | 1.335651  | H                  | 0.867685  | 0.421977  | 1.505854  |
| H | 3.987476  | -3.568020 | 2.318028  | O                  | 5.239976  | -0.235452 | 2.322818  |
| C | 5.395907  | -3.138530 | 0.710918  | H                  | 4.302722  | -0.321144 | 2.663085  |
| H | 6.238563  | -3.651635 | 1.200032  | H                  | 5.116925  | -0.380994 | 1.363686  |
| C | 5.580575  | -2.511093 | -0.535190 | CH3COOH_H2O        |           |           |           |
| H | 6.565704  | -2.536724 | -1.026930 | C                  | -0.319885 | 1.355116  | 0.036930  |
| C | 4.509903  | -1.850827 | -1.162924 | H                  | -0.599668 | 1.829579  | -0.926675 |
| H | 4.669779  | -1.381630 | -2.145774 | H                  | -0.857467 | 1.897896  | 0.840050  |
| C | 1.192499  | -2.396455 | -2.456841 | H                  | 0.772983  | 1.410757  | 0.182862  |
| C | 1.116360  | -3.710653 | -1.942315 | C                  | -0.742471 | -0.085975 | 0.015341  |
| H | 1.509071  | -3.939870 | -0.939888 | O                  | 0.023186  | -1.053247 | 0.040499  |
| C | 0.547903  | -4.740309 | -2.711970 | O                  | -2.082081 | -0.240440 | -0.048294 |
| H | 0.499421  | -5.761448 | -2.301981 | H                  | -2.275010 | -1.207441 | -0.075560 |
| C | 0.049807  | -4.470322 | -3.999735 | O                  | 2.668188  | -0.109180 | 0.061894  |
| H | -0.393588 | -5.278819 | -4.602098 | H                  | 2.683684  | 0.218833  | -0.859398 |
| C | 0.122888  | -3.163807 | -4.515712 | H                  | 1.775264  | -0.541528 | 0.092303  |
| H | -0.263596 | -2.943725 | -5.523375 | CH3COO_H2O         |           |           |           |
| C | 0.683867  | -2.128384 | -3.748244 | C                  | 0.357596  | 1.321237  | -0.000746 |
| H | 0.714634  | -1.111744 | -4.168072 | H                  | 0.178993  | 1.635408  | 1.051128  |
| C | -0.518349 | -2.192094 | 2.571963  | H                  | 1.113076  | 2.003746  | -0.437838 |
| H | -0.728430 | -3.244387 | 2.850807  | H                  | -0.610790 | 1.410164  | -0.531314 |
| H | 0.500880  | -1.928517 | 2.921381  | C                  | 0.851520  | -0.136903 | -0.000916 |
| C | -1.528340 | -1.216941 | 3.143981  | O                  | -0.046959 | -1.054970 | 0.078530  |
| H | -1.104309 | -0.196962 | 3.117789  | O                  | 2.094995  | -0.354518 | -0.046294 |
| H | -1.743911 | -1.452864 | 4.208934  | O                  | -2.524767 | -0.108172 | -0.117871 |
| C | -3.502273 | -2.527507 | 2.323741  | H                  | -2.532483 | 0.486705  | 0.657418  |
| H | -4.379729 | -2.417163 | 1.659211  | H                  | -1.589641 | -0.500739 | -0.044340 |
| H | -2.821190 | -3.227631 | 1.804652  | H2                 |           |           |           |
| C | -3.928030 | -3.107878 | 3.671504  | H                  | 0.000000  | 0.000000  | 0.383859  |
| H | -4.377683 | -4.105026 | 3.488531  | H                  | 0.000000  | 0.000000  | -0.383859 |
| H | -3.069825 | -3.251721 | 4.358517  | H2O                |           |           |           |
| H | -4.691482 | -2.488674 | 4.183186  | O                  | 0.000000  | -0.000000 | 0.123841  |
| C | -3.680971 | -0.133945 | 2.984938  | H                  | 0.000000  | 0.756806  | -0.495363 |
| H | -3.972303 | -0.478979 | 3.999342  | H                  | -0.000000 | -0.756806 | -0.495363 |
| H | -3.045155 | 0.760788  | 3.121535  | MBH (acetonitrile) |           |           |           |
| C | -4.917488 | 0.253124  | 2.181694  | C                  | -3.752436 | -0.053209 | 0.216629  |
| H | -5.516727 | 0.932590  | 2.822123  | C                  | -3.609085 | 1.364847  | 0.283251  |
| H | -5.571709 | -0.619638 | 1.979055  | C                  | -2.592285 | -0.802464 | -0.146806 |
| C | -4.585247 | 1.025469  | 0.909888  | C                  | -1.372608 | -0.165700 | -0.430813 |
| H | -3.903650 | 1.860519  | 1.159086  | C                  | -1.230451 | 1.242201  | -0.338329 |
| H | -5.504423 | 1.478144  | 0.482084  | C                  | -2.373940 | 1.981666  | 0.033459  |
| C | -4.826219 | -0.820367 | -0.744538 | C                  | 1.376779  | -0.163751 | -0.460634 |
| H | -5.090114 | -1.504227 | 0.083563  | C                  | 1.233987  | 1.243548  | -0.361215 |
| H | -4.227256 | -1.425383 | -1.451208 | C                  | 2.601643  | -0.799515 | -0.196545 |
| C | -6.091961 | -0.308997 | -1.431760 | C                  | 3.770810  | -0.048295 | 0.131423  |
| H | -6.645571 | -1.185591 | -1.825479 | C                  | 3.619695  | 1.366849  | 0.232155  |
| H | -6.770257 | 0.227312  | -0.738588 | C                  | 2.379714  | 1.982532  | 0.004743  |
| H | -5.866112 | 0.354304  | -2.290893 | N                  | -0.000880 | 1.868700  | -0.608097 |
| C | -3.422747 | 1.207797  | -1.201007 | H                  | -2.635640 | -1.897780 | -0.223684 |
| H | -2.761849 | 1.929496  | -0.685374 | H                  | -4.462851 | 2.002397  | 0.549988  |
| H | -4.281070 | 1.785821  | -1.607194 | H                  | -2.291552 | 3.078424  | 0.117384  |
| C | -2.660731 | 0.518938  | -2.310813 | H                  | 2.642746  | -1.895245 | -0.268237 |
| H | -2.096205 | 1.254233  | -2.913843 | H                  | 4.472904  | 2.003461  | 0.502874  |
| H | -3.323381 | -0.044995 | -2.998436 | H                  | 2.293324  | 3.077188  | 0.109365  |
| H | 1.373579  | -0.100474 | 0.900117  | S                  | -0.003153 | -1.154565 | -1.036215 |
| C | 2.948125  | 1.703127  | 4.249827  | N                  | 4.993408  | -0.672001 | 0.344651  |
| H | 3.496434  | 2.406248  | 3.586977  | N                  | -4.958881 | -0.681326 | 0.492679  |
| H | 2.268579  | 2.304998  | 4.884780  | C                  | -5.085910 | -2.117046 | 0.305011  |
| H | 3.684127  | 1.163635  | 4.875410  | H                  | -4.368144 | -2.682623 | 0.941553  |
| C | 2.162365  | 0.744416  | 3.367064  | H                  | -6.105714 | -2.434906 | 0.591174  |
| O | 2.645143  | -0.399302 | 3.103137  | H                  | -4.913323 | -2.429959 | -0.753146 |

|                     |           |           |           |
|---------------------|-----------|-----------|-----------|
| C                   | 5.063799  | -2.123588 | 0.384861  |
| H                   | 4.719055  | -2.578254 | -0.570781 |
| H                   | 6.113776  | -2.434880 | 0.539118  |
| H                   | 4.449337  | -2.564601 | 1.207191  |
| C                   | -6.147397 | 0.117970  | 0.741569  |
| H                   | -6.017173 | 0.790413  | 1.619582  |
| H                   | -6.427078 | 0.756695  | -0.130809 |
| H                   | -6.999604 | -0.552176 | 0.960259  |
| C                   | 6.121318  | 0.106810  | 0.830122  |
| H                   | 6.382378  | 0.931716  | 0.130162  |
| H                   | 5.932769  | 0.563841  | 1.832015  |
| H                   | 7.008103  | -0.548693 | 0.915685  |
| H                   | -0.000188 | 2.883293  | -0.468156 |
| MB (acetonitrile)   |           |           |           |
| C                   | -3.822505 | -0.004499 | 0.000019  |
| C                   | -3.637542 | 1.430432  | -0.000110 |
| C                   | -2.654073 | -0.834021 | 0.000169  |
| C                   | -1.380941 | -0.269366 | 0.000235  |
| C                   | -1.184583 | 1.169309  | 0.000148  |
| C                   | -2.374549 | 1.976586  | -0.000042 |
| C                   | 1.380939  | -0.269357 | 0.000200  |
| C                   | 1.184545  | 1.169332  | 0.000237  |
| C                   | 2.654087  | -0.833968 | -0.000000 |
| C                   | 3.822512  | -0.004439 | -0.000106 |
| C                   | 3.637517  | 1.430503  | 0.000057  |
| C                   | 2.374508  | 1.976616  | 0.000198  |
| N                   | -0.000019 | 1.803623  | 0.000216  |
| H                   | -2.754145 | -1.928069 | 0.000269  |
| H                   | -4.507682 | 2.099165  | -0.000245 |
| H                   | -2.232582 | 3.068379  | -0.000133 |
| H                   | 2.754153  | -1.928010 | -0.000033 |
| H                   | 4.507551  | 2.099379  | 0.000096  |
| H                   | 2.232510  | 3.068405  | 0.000285  |
| S                   | 0.000030  | -1.358963 | 0.000662  |
| N                   | 5.068792  | -0.545261 | -0.000267 |
| N                   | -5.068795 | -0.545285 | -0.000062 |
| C                   | -5.249718 | -1.997880 | -0.000247 |
| H                   | -4.792008 | -2.458918 | 0.900928  |
| H                   | -6.329118 | -2.228098 | 0.000296  |
| H                   | -4.792963 | -2.458600 | -0.902088 |
| C                   | 5.249675  | -1.997890 | -0.000343 |
| H                   | 4.792521  | -2.458765 | 0.901179  |
| H                   | 4.792422  | -2.458725 | -0.901865 |
| H                   | 6.329083  | -2.228100 | -0.000531 |
| C                   | -6.257524 | 0.311311  | -0.000613 |
| H                   | -6.287709 | 0.958953  | 0.901083  |
| H                   | -6.287433 | 0.958209  | -0.902860 |
| H                   | -7.157860 | -0.326818 | -0.000476 |
| C                   | 6.257618  | 0.311231  | -0.000486 |
| H                   | 6.287496  | 0.958384  | -0.902536 |
| H                   | 6.287734  | 0.958655  | 0.901380  |
| H                   | 7.157892  | -0.326962 | -0.000451 |
| MeCN (acetonitrile) |           |           |           |
| C                   | -0.274598 | 0.000083  | 0.000025  |
| N                   | -1.446994 | -0.000025 | -0.000010 |
| C                   | 1.181571  | 0.000029  | 0.000006  |
| H                   | 1.562639  | 1.014033  | -0.239298 |
| H                   | 1.562136  | -0.714501 | -0.758596 |
| H                   | 1.562339  | -0.300030 | 0.997776  |
